# Supplementary material for: Synthetic Rhizosphere Communities as Scalable Enhancers of Fertilizer Efficiency for Climate-Smart Agriculture
Source: Research Square preprint supplement (doi:10.21203/rs.3.rs-7942996/v1), 2025-10-31
Supplement: Supplementary file 1 [file 89eda3ad320af2a2df50740c.pdf]

**ASINAGRO**  
AGRONOMIC ADVICE AND RESEARCH

TEST WITH ADDITIVE FOR FERTILIZERS HUMUS - RICE

*Second section – Thirty-Three - Uruguay*

2023-2024 HARVEST

## INTRODUCTION

The essay is based on a little-known topic for rice cultivation in our country: the use of the fertilizer additive Humus from the Paraguayan company Tiróleo .

The bioactivation of fertilizers, with additives such as humus, aims to optimize their assimilation in order to reduce their consumption, maximizing the use of nutrients and minimizing losses that affect the environment and the producers' economy.

Agricultural activities today face challenges in finding ways to ensure the preservation of natural resources for future generations, minimize environmental impacts, help mitigate climate change, and produce food of proven safety and quality.

In this context, there are various strategies and visions regarding the paths to be taken. In our case, we see a priority in advancing paths that promote gradual changes in inputs, management, and processes, reducing the environmental footprint and maintaining or improving the productivity and quality of the rice produced.

The incorporation of bioinputs , such as the additive Humus de Tyróleo , is a key tool to generate valid alternatives to a traditional sustainable and high-productivity management system.

In response to this challenge, an exact basal fertilization trial using the Humus additive from the company Tiróleo was installed in the second section of the Treinta y Tres department, on a farm with a long history of cultivation.

Starting with the NPK fertilizer dosage recommended by a technical expert based on soil analysis, two doses of humus were tested, both in addition to and in place of the fertilizer, and compared with a commercial control (fertilizer alone). Furthermore, all treatments were applied in duplicate, incorporated into the row or broadcast as a cover crop, to compare the effectiveness of both localization methods.

This report presents data on the test setup, materials and methods, results, statistical analysis of performance, and final comments. Illustrative photographs are also included.

## GOALS

- To evaluate the effectiveness of the fertilizer additive Humus in rice cultivation.
- Contrast between online application and random coverage.
- Adjust the application of Humus in relation to replacement or addition with NPK fertilizer.
- Quantify its impact on crop yield.

## MATERIALS AND METHODS

**Product evaluated:** fertilizer additive

### Humus

Bioactivating additive with the same physical characteristics as a granulated fertilizer, making it suitable for mixing prior to application.

It is obtained from plant remains that go through a fermentation process where a set of microorganisms – Microbiome – are incorporated, which interact with each other , in balance and conditioned by the soil and the chemical processes that direct them.

Nutrient release depends on the existing microbiology in the soil, but the use of the additive increases this dynamic because the incorporated microbiome favors the processes that make nutrients available to plants.

**Treatments:** (Dose kg/ha)

| TRT | Humus | NPK (1) | Location             | Relationship<br>Humus: NPK |
|-----|-------|---------|----------------------|----------------------------|
| 1-  | 0     | 150     | Line                 | Control                    |
| 2-  | 0     | 150     | Broadcast<br>seeding | Control                    |
| 3-  | 50    | 150     | Line                 | Additive                   |
| 4-  | 50    | 150     | Broadcast<br>seeding | Additive                   |
| 5-  | 50    | 100     | Line                 | Replacement<br>(2)         |
| 6-  | 50    | 100     | Broadcast<br>seeding | Replacement<br>(2)         |
| 7-  | 20    | 150     | Line                 | Additive                   |
| 8-  | 20    | 150     | Broadcast<br>seeding | Additive                   |
| 9-  | 20    | 100     | Line                 | Replacement<br>(3)         |
| 10- | 20    | 100     | Broadcast<br>seeding | Replacement<br>(3)         |

(1) NPK base fertilizer: 0 – 20/20 – 30

(2) Complete 1:1 replacement with a 33% reduction in NPK dosage

(3) Partial replacement 0.4:1 with 33% reduction in NPK dosage

## Design

Random blocks with three repetitions  
Plots of 20 m<sup>2</sup> (4 m wide by 5 m long).

**Distribution of treatments:**

|    |   |   |   |    |
|----|---|---|---|----|
| 5  | 6 | 4 | 7 | 3  |
| 10 | 1 | 9 | 2 | 8  |
| 1  | 3 | 5 | 7 | 9  |
| 2  | 4 | 6 | 8 | 10 |
| 10 | 9 | 8 | 7 | 6  |
| 1  | 2 | 3 | 4 | 5  |

## Test facility

| Locality       | Producer        | Planting date | Cultivate  |
|----------------|-----------------|---------------|------------|
| The Charqueada | Hernán Zorrilla | October 16    | INIA Merín |

Representative location of the traditional rice-growing basin of Laguna Merín. The area near the town of La Charqueada in the department of Treinta y Tres corresponds to the unit of the same name on the Uruguayan Soil Survey Chart, scale 1:1,000,000, and the dominant soil where the

trial was conducted is a Planosol. Subeutric Ocher with silty loam texture , with Solods Associated ochrics .

### Soil analysis -

Predecessor: legume meadow

Management: Spring glyphosate – pre-tillage (disk and leveling)

|                        |      |
|------------------------|------|
| pH (H <sub>2</sub> O)  | 5.9  |
| MO (%)                 | 2.1  |
| P – citric acid (ppm)  | 5    |
| K ( meq /100 gr soil)  | 0.17 |
| Mg ( meq /100 gr soil) | 2.1  |
| Mg/K ratio             | 12.3 |

### Recommended Dose

The recommendation for fertilizing rice with phosphorus and potassium is determined by the information contained in INIA Technical Sheet No. 46, based on chemical analysis of the soil.

For phosphorus adjustment, the soil analysis data was considered (range between 3 - 5 ppm), in a medium soil (30 - 50% clay) and taking as a fertilization strategy the criterion of “sufficiency”, which consists of adding nutrients up to a critical level, above which the probability of finding a yield response is low.

For the potassium adjustment, the soil analysis data (0.14 – 0.17 meq / 100 gr soil) was considered with ammonium acetate extraction, with a Mg / K ratio (< 15) and taking the “sufficiency” criterion as a fertilization strategy.

According to the tables, the fertilization recommendation would be:

- P<sub>2</sub>O<sub>5</sub> = 42 units / ha
- K<sub>2</sub>O = 50 units / ha

For the commercial Control NPK (0 - 20/20 - 30) it is adjusted to 150 kg/ ha (treatment 1).

### Description of the environment

The trial was installed in a rice crop, planted on a Planosol Subeutric Ocher with a silty loam texture , associated with a Solods Ocrico belonging to the La Charqueada unit.

The sowing date of the farm corresponds to mid-October with the INIA Merín cultivar of Indica genotype, long cycle and resistant to *Pyricularia oryzae* . When planted at the recommended time, this high-yield variety, with adequate P and K adjustments, has shown a strong response to nitrogen fertilization. Since its release in 2015, its area has been increasing, currently positioning itself as the one with the largest planted area, reaching 50% of the rice area in the last harvest.



**Crop management:**

Sowing:

Date: 16-10-23

Sowing conditions: Good sowing preparation

Soil with low humidity

Sowing type: row – seeder: John Deere pneumatic Cultivar: INIA Merín / Sowing density: 140 kg/ ha

Basal fertilization:

Date: 5-11-23 with the crop emerged (rice 1 leaf)

Dosage: according to treatments

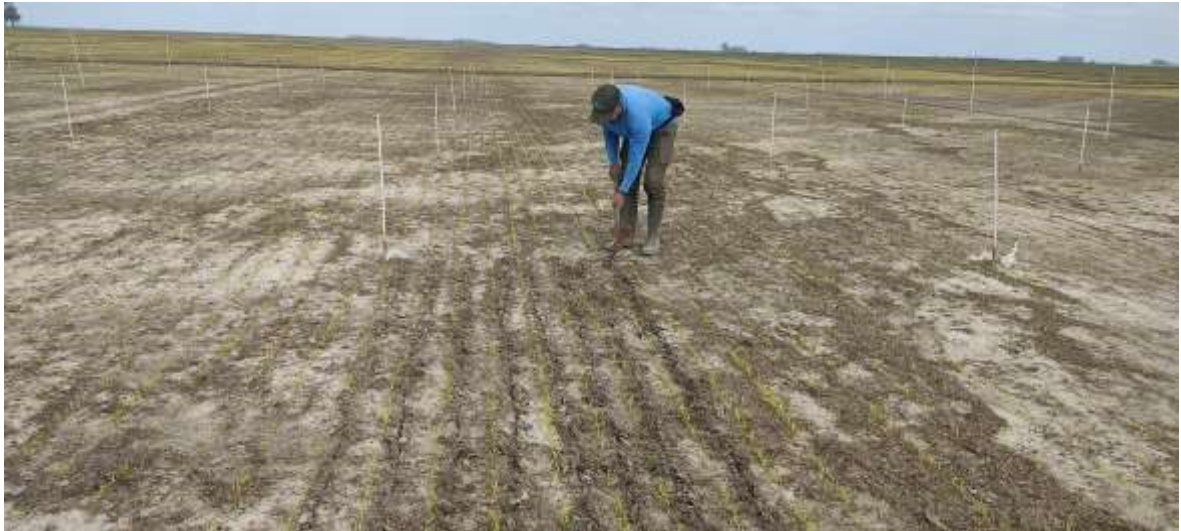

Photo 1 – State of the trial at the time of installation, marking the lines for manual fertilization in the furrow.

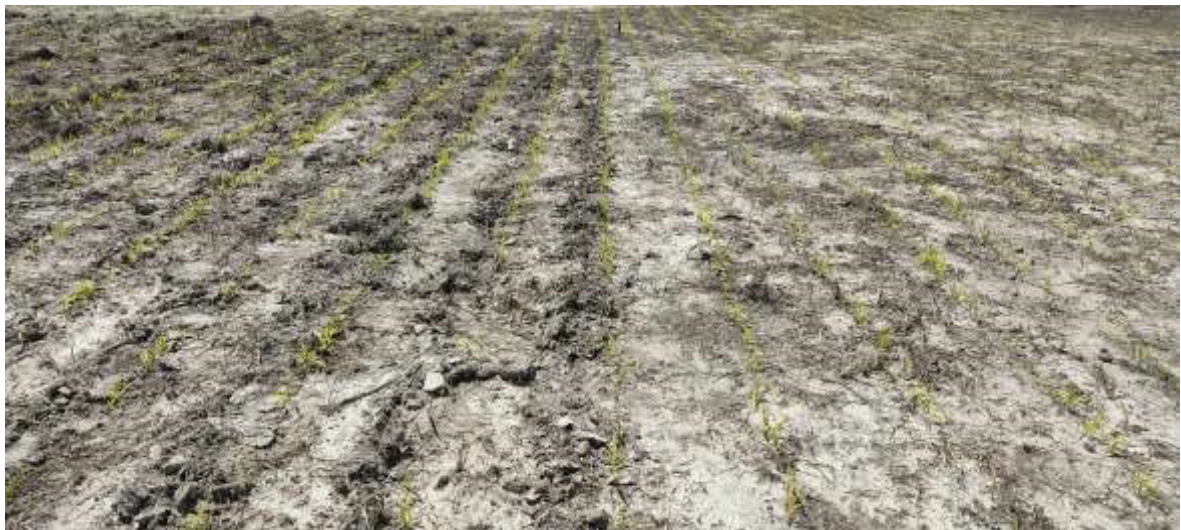

Photo 2 – Left: Fertilization treatments in the row. Right: Fertilization treatment at Broadcast seeding in coverage.

30 - 11 - 2023: first coverage with urea (46-0/0-0): 150 kg/ ha at the beginning of tillering

03 - 12 - 2023: start of permanent flooding

26 - 12 - 2023: second coverage with urea (46-0/0-0): 50 kg/ha at primordium

Climatic characterization of the harvest determining the yield potential

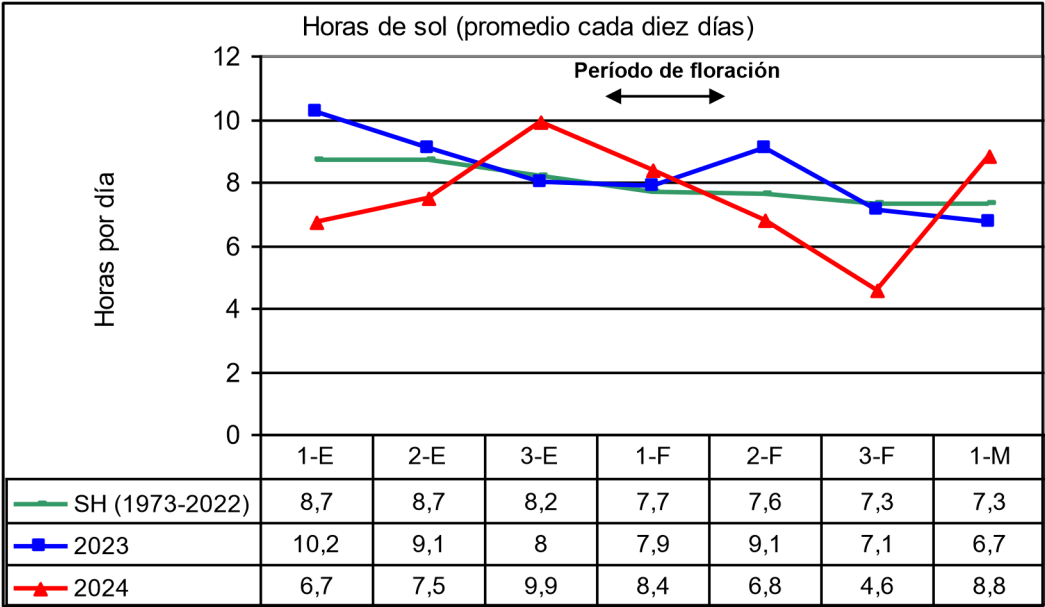

Chart I – Average sunshine hours per decade

Source: Agroclimatology Bulletin – Inia Treinta y Tres Laguna Pass Station

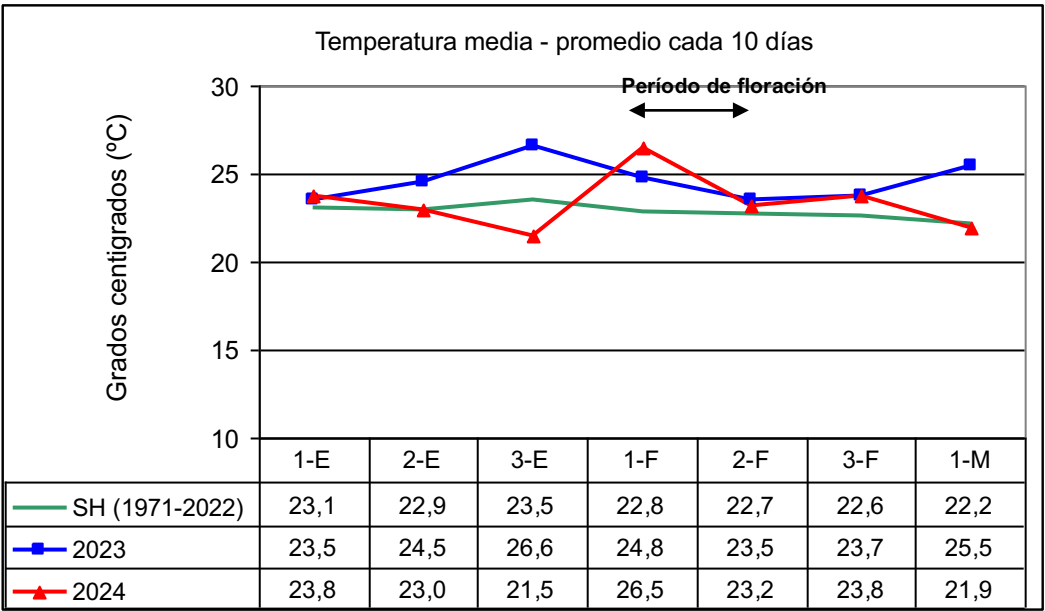

Graph II – Average temperature per decade

Source: Agroclimatology Bulletin – Inia Treinta y Tres Laguna Pass Station

This harvest showed lower luminosity, 3.6% lower than the historical series and 7.5% below the previous one, in the critical period defined by Stansel , J (1975), which covers the 21 days before and 21 days after flowering, where sunlight hours have the greatest impact on yields. On the other hand, the average temperature, except in the last decade of January, was higher than the historical series during the reproductive stage, which is the most sensitive time to determine grain sterility due to the incidence of low temperatures. This factor is identified as one of the main causes that explain the instability of yields in the eastern part of our country.

For the October planting season, climatic factors showed similar results to the historical series, but with strong fluctuations, mainly in sunlight hours. Therefore, yields with high variability between fields could be expected, in response to the technological management employed by the producer.

### **PERFORMANCES**

Kg/ ha corrected to 13% humidity

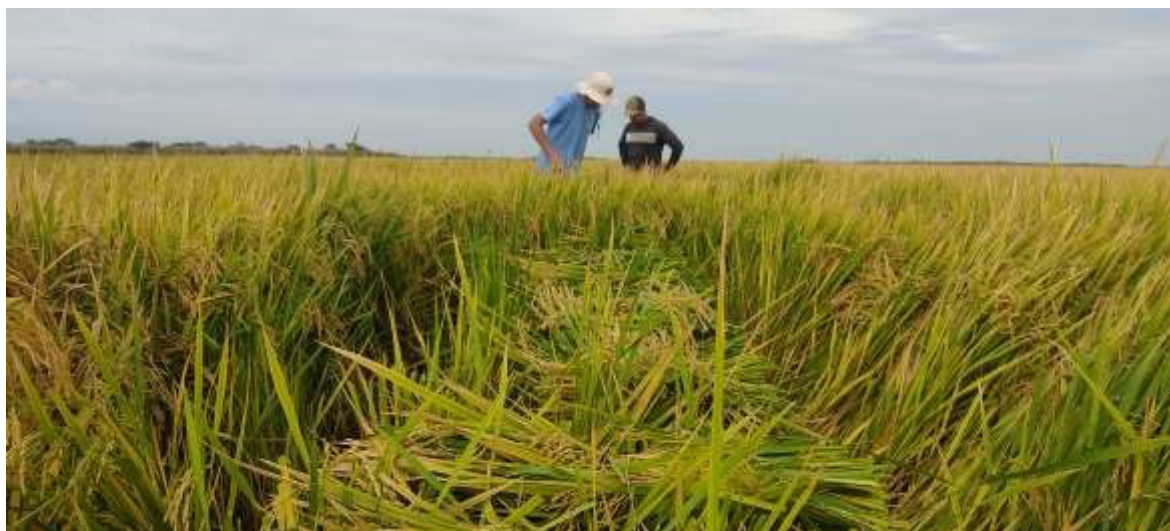

| Treatments | Yo    | II    | III   | Average |
|------------|-------|-------|-------|---------|
| 1          | 9851  | 9403  | 9537  | 9597    |
| 2          | 10299 | 9627  | 10030 | 9985    |
| 3          | 10612 | 10746 | 10254 | 10537   |
| 4          | 10164 | 9851  | 10791 | 10269   |
| 5          | 10701 | 10881 | 11060 | 10881   |
| 6          | 10567 | 10343 | 10030 | 10313   |
| 7          | 10254 | 10612 | 10746 | 10537   |
| 8          | 11194 | 10030 | 10343 | 10522   |
| 9          | 10075 | 10522 | 10299 | 10299   |
| 10         | 10254 | 9896  | 9627  | 9925    |

- Overall average of the test: 10287 kg/ ha (206 dry bags/ ha )

| TRT | Humus | NPK | Location          |
|-----|-------|-----|-------------------|
| 1-  | 0     | 150 | Line              |
| 2-  | 0     | 150 | Broadcast seeding |
| 3-  | 50    | 150 | Line              |
| 4-  | 50    | 150 | Broadcast seeding |
| 5-  | 50    | 100 | Line              |
| 6-  | 50    | 100 | Broadcast seeding |
| 7-  | 20    | 150 | Line              |

|     |    |     |                   |
|-----|----|-----|-------------------|
| 8-  | 20 | 150 | Broadcast seeding |
| 9-  | 20 | 100 | Line              |
| 10- | 20 | 100 | Broadcast seeding |

### STATISTICAL ANALYSIS

| FV         | gl | SC      | CM     | F      |
|------------|----|---------|--------|--------|
| Blocks     | 2  | 215460  | 107730 |        |
| Treatments | 9  | 3696770 | 410752 | 3.57 * |
| Mistake    | 18 | 2070127 | 115007 |        |
| Total      | 29 | 5982357 |        |        |

CV: 3.30%

With a general average of the test of 10287 kg/ ha , statistically significant differences were found at 5%, due to the treatments.

| Treatments | Average Yield (kg/ ha ) |    |  |
|------------|-------------------------|----|--|
| 5          | 10881                   | to |  |
| 3          | 10537                   | ab |  |
| 7          | 10537                   | ab |  |
| 8          | 10522                   | ab |  |
| 6          | 10313                   | bc |  |
| 9          | 10299                   | bc |  |
| 4          | 10269                   | bc |  |
| 2          | 9985                    | CD |  |
| 10         | 9925                    | CD |  |
| 1          | 9597                    | d  |  |

DMS = 411 kg/ ha

Means with a common letter are not significantly different ( $p > 0.05$ )

| TRT | Humus | NPK | Location          |
|-----|-------|-----|-------------------|
| 1-  | 0     | 150 | Line              |
| 2-  | 0     | 150 | Broadcast seeding |
| 3-  | 50    | 150 | Line              |
| 4-  | 50    | 150 | Broadcast seeding |
| 5-  | 50    | 100 | Line              |

|     |    |     |                   |
|-----|----|-----|-------------------|
| 6-  | 50 | 100 | Broadcast seeding |
| 7-  | 20 | 150 | Line              |
| 8-  | 20 | 150 | Broadcast seeding |
| 9-  | 20 | 100 | Line              |
| 10- | 20 | 100 | Broadcast seeding |

#### Average yield per treatment

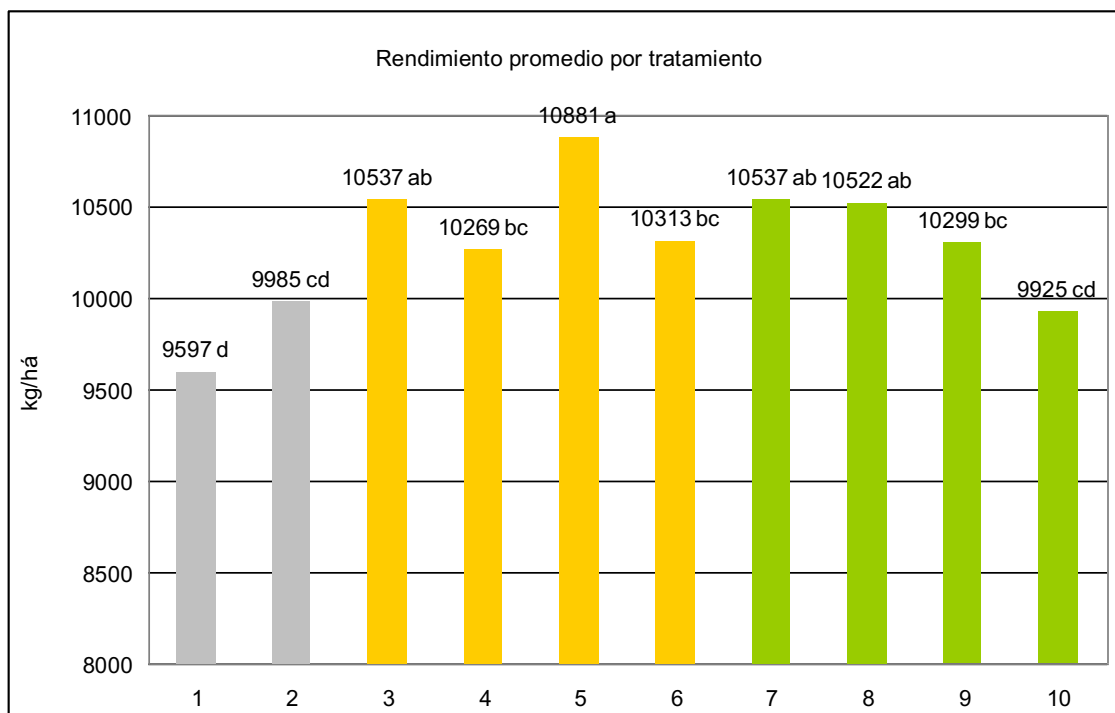

Chart No. 1 - Average yield (kg/ ha ) per treatment. With separation of averages.

Means with a common letter are not significantly different ( $p > 0.05$ )

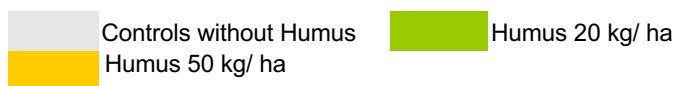

| TRT | Humus | NPK | Location          |
|-----|-------|-----|-------------------|
| 1-  | 0     | 150 | Line              |
| 2-  | 0     | 150 | Broadcast seeding |
| 3-  | 50    | 150 | Line              |
| 4-  | 50    | 150 | Broadcast seeding |
| 5-  | 50    | 100 | Line              |
| 6-  | 50    | 100 | Broadcast seeding |
| 7-  | 20    | 150 | Line              |
| 8-  | 20    | 150 | Broadcast seeding |
| 9-  | 20    | 100 | Line              |
| 10- | 20    | 100 | Broadcast seeding |

#### Ordered decreasing average yield and productive response

| Treatments | Rend Average ( kg/ ha ) | Rend Prom ( bls / ha ) (1) | Productive response ( % ) (2) |
|------------|-------------------------|----------------------------|-------------------------------|
| 5          | 10881                   | 218                        | 113                           |
| 3          | 10537                   | 211                        | 110                           |
| 7          | 10537                   | 211                        | 110                           |
| 8          | 10522                   | 210                        | 110                           |
| 6          | 10313                   | 206                        | 107                           |
| 9          | 10299                   | 206                        | 107                           |
| 4          | 10269                   | 205                        | 107                           |
| 2          | 9985                    | 200                        | 104                           |
| 10         | 9925                    | 199                        | 103                           |
| 1          | 9597                    | 192                        | 100                           |

(1) Average yield: in dry bags of 50 kg/ ha

(2) Productive response on the commercial Control (treatment 1)\_ Base = 100%

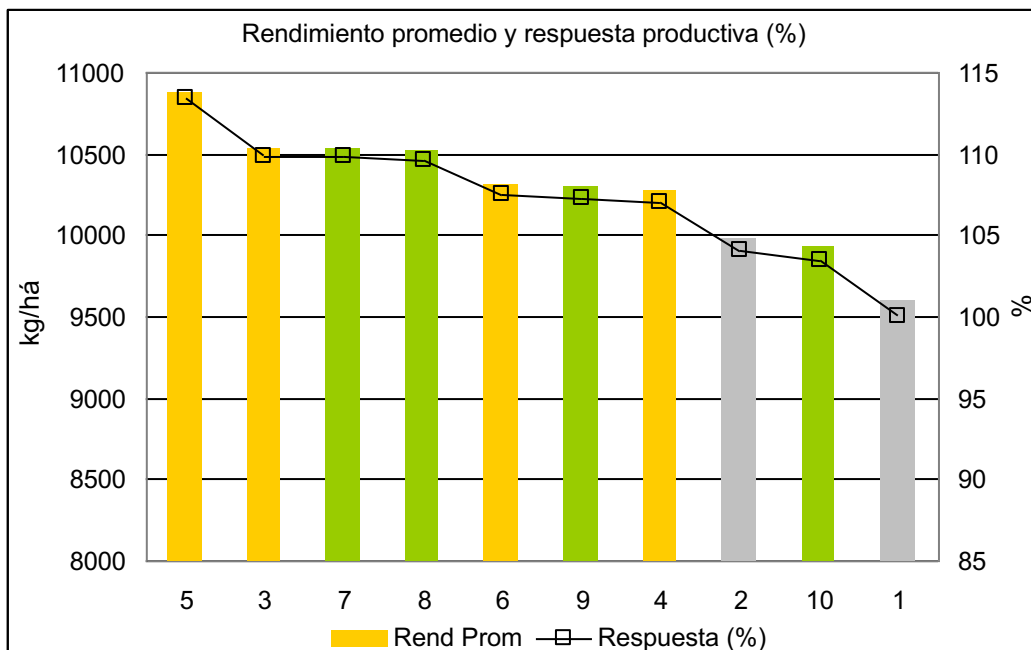

Graph No. 2 - Average yield ordered decreasing (kg/ ha ) and productive response (%)

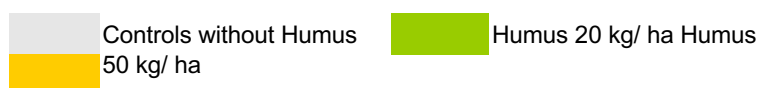

| TRT | Humus | NPK | Location          |
|-----|-------|-----|-------------------|
| 1-  | 0     | 150 | Line              |
| 2-  | 0     | 150 | Broadcast seeding |
| 3-  | 50    | 150 | Line              |
| 4-  | 50    | 150 | Broadcast seeding |
| 5-  | 50    | 100 | Line              |
| 6-  | 50    | 100 | Broadcast seeding |
| 7-  | 20    | 150 | Line              |
| 8-  | 20    | 150 | Broadcast seeding |
| 9-  | 20    | 100 | Line              |
| 10- | 20    | 100 | Broadcast seeding |

**Average yields (kg/ ha ) grouped by:**

**1- Dose of Humus and NPK fertilizer 2- Location method**

| Dose (kg/ ha ) (1) | Line  | Broadcast seeding | Average |
|--------------------|-------|-------------------|---------|
| 0 + 150            | 9597  | 9985              | 9791    |
| 20 + 100           | 10299 | 9925              | 10112   |
| 50 + 100           | 10881 | 10313             | 10597   |
| 20 + 150           | 10537 | 10522             | 10530   |



|          |       |       |       |
|----------|-------|-------|-------|
| 50 + 150 | 10537 | 10269 | 10403 |
| Average  | 10370 | 10203 |       |

(1): Humus + Fertilizer

Grouping yields by location method, the overall average for in-line applications showed a 1.6% increase compared to the average for broadcast treatments applied to the cover crop.

The doses of 50 + 100 and 20 + 150, of Humus + NPK fertilizer, recorded the highest average yield, considering all the dose combinations evaluated.

### Yields (kg/ha) depending on the response to doses of Humus + NPK fertilizer

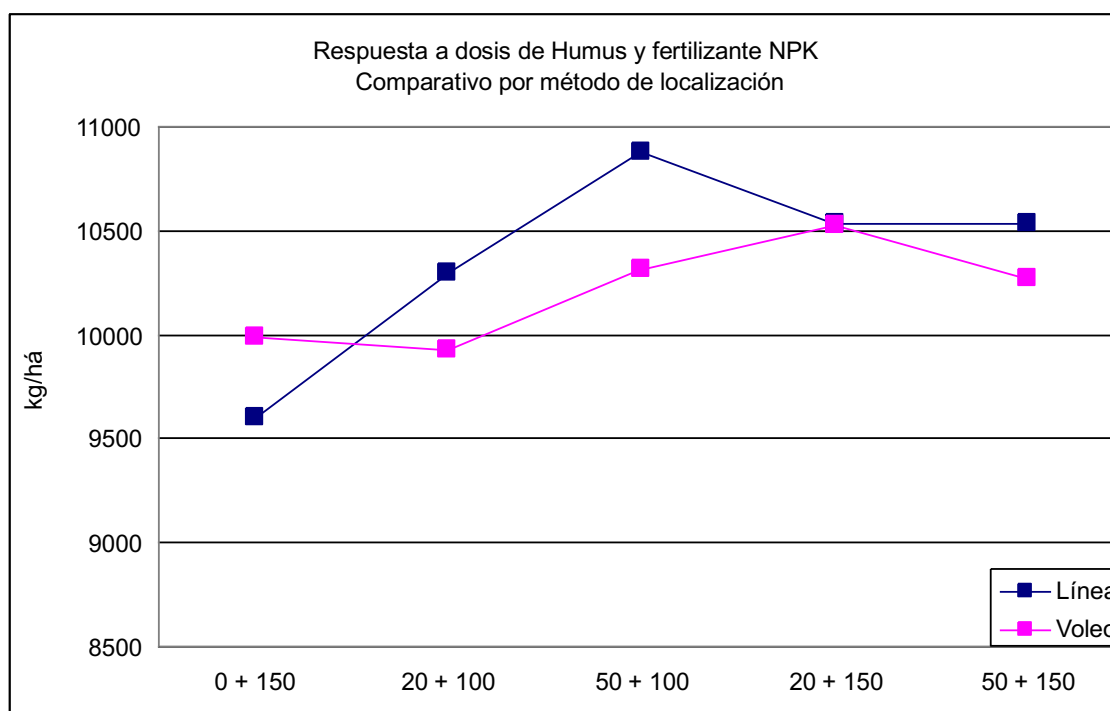

Chart 3 - Response to doses of humus + NPK fertilizer. Comparison of different localization methods.



### Yields grouped by dose of Humus and NPK fertilizer

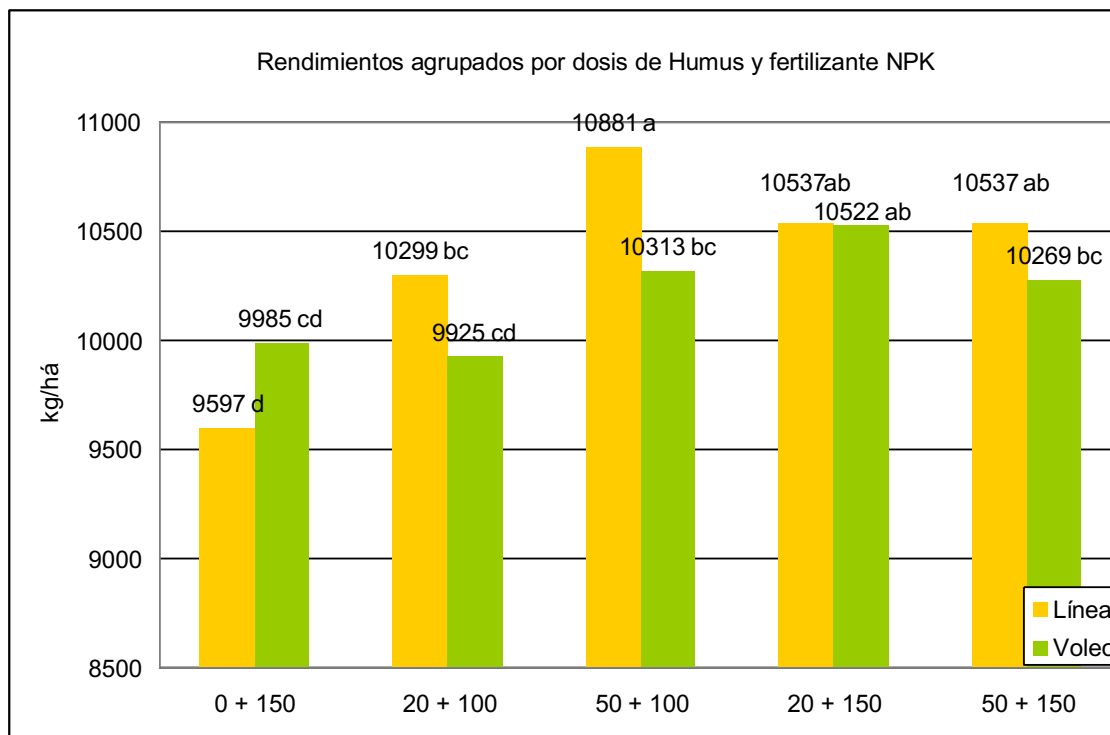

Chart 4 - Yields grouped by dose of humus and NPK fertilizer. With separation of averages.

Means with a common letter are not significantly different ( $p > 0.05$ )

- ❑ With the dose of Humus 50 + NPK 100, the localization treatment on the line significantly exceeded that of broadcast application on the cover.
- ❑ In the remaining dose combinations, no statistically significant differences were found by location method.
- ❑ In most cases, a trend of higher yield was observed for treatments applied in the line compared to broadcast treatments, except in the case of fertilization with NPK alone, where the trend was the opposite.

### Yields grouped by location method

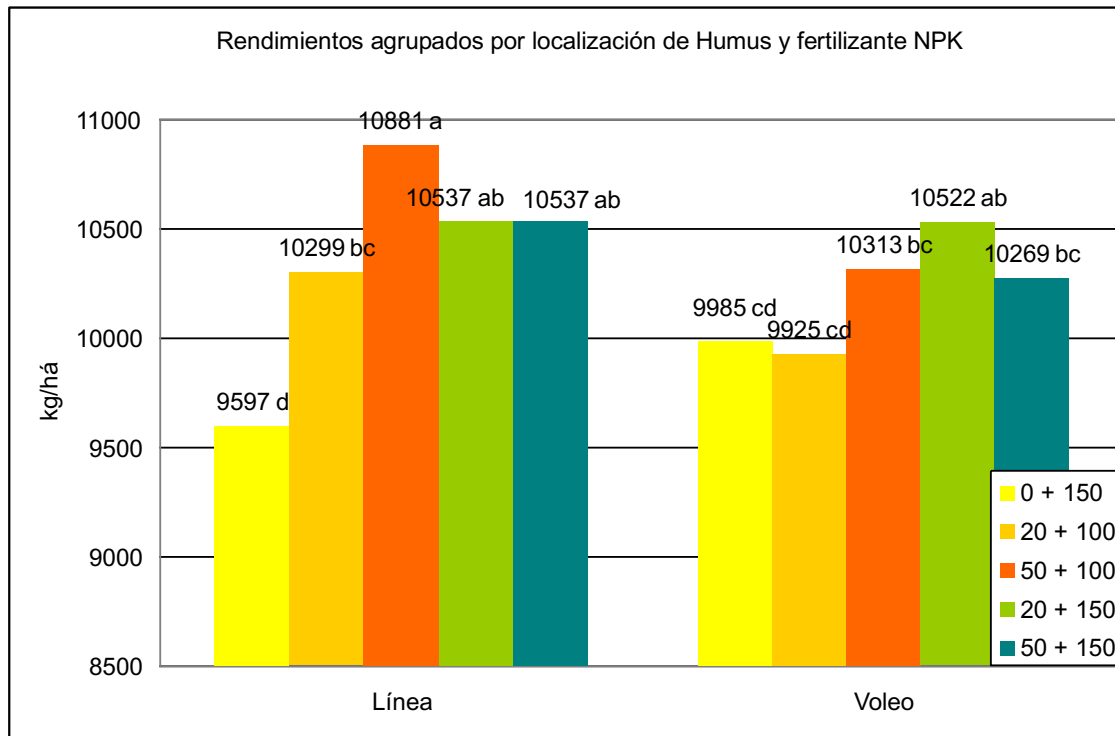

Chart 5 - Yields grouped by location method. With mean separation.

Means with a common letter are not significantly different ( $p > 0.05$ )

- ❑ By applying Humus and NPK fertilizer to the line, all treatments with the bioactivator significantly outperformed the commercial control (NPK fertilizer only).
- ❑ With this application method, the treatment with Humus 50 + NPK 100 stood out, being positioned in a first step of performance, but did not differ statistically from the treatments of 20 + 150 and 50 + 150, of Humus and NPK respectively.
- ❑ When applying humus and NPK fertilizer broadcast on the cover crop, only the treatment with Humus 20 + NPK 150 significantly outperformed the commercial control (NPK fertilizer only). The other combinations did not differ statistically from the control.
- ❑ In general terms, four combinations of Humus and NPK fertilizer achieved significant productive response over the best commercial control (only NPK fertilizer broadcast), three of them were applied in line and one broadcast.
- ❑ The responses were variable, in one case the addition of Humus replacing the NPK fertilizer dose 1:1 caused a significant increase in yield and in the three remaining cases the response was achieved by adding the bioactivator to the NPK control dose.

Photo 3: In the foreground, the commercial NPK 150 control applied in-line. It presented the lowest test performance, not differing statistically from only two treatments and being significantly outperformed by the rest.

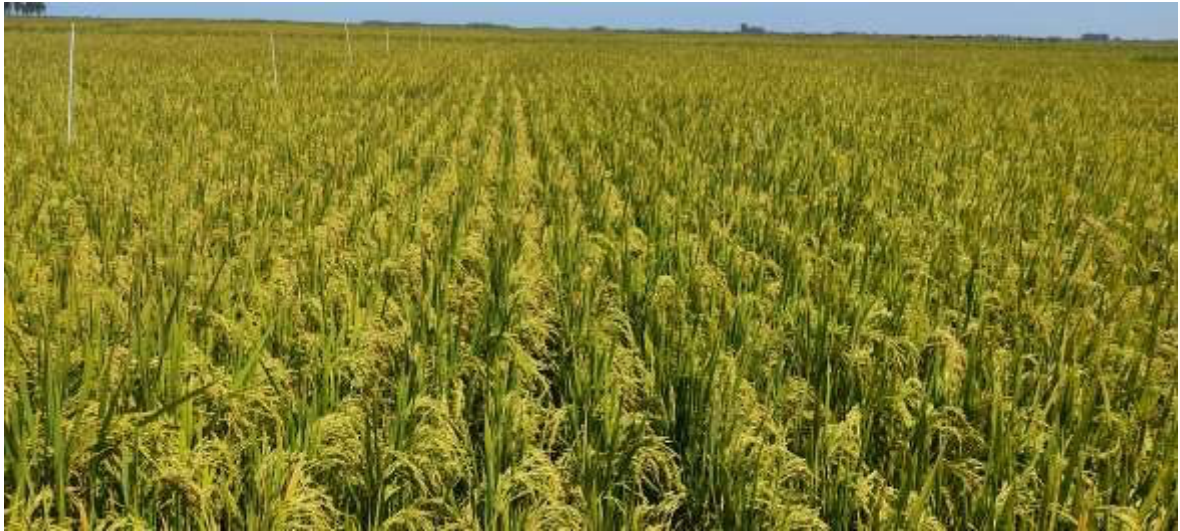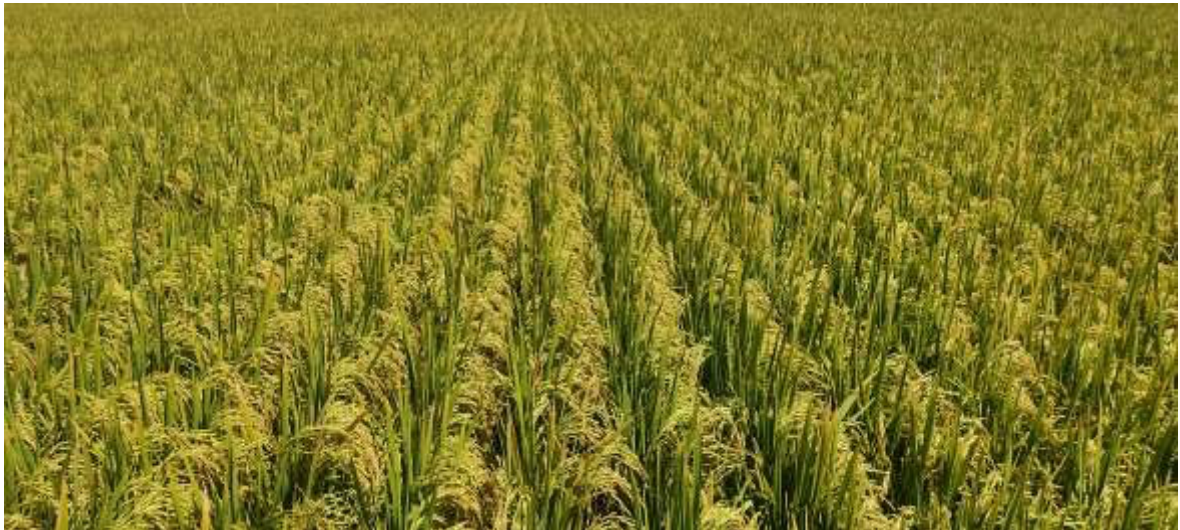

Photo 4: The commercial Control NPK 150 applied by broadcasting was significantly surpassed by four combinations of Humus + fertilizer, three of them in line and one broadcast.



Photo 5: Treatment 3 (Humus 50 + NPK 150 applied in line) was the best in terms of yields step and significantly outperformed the best commercial Control (fertilizer NPK lone).

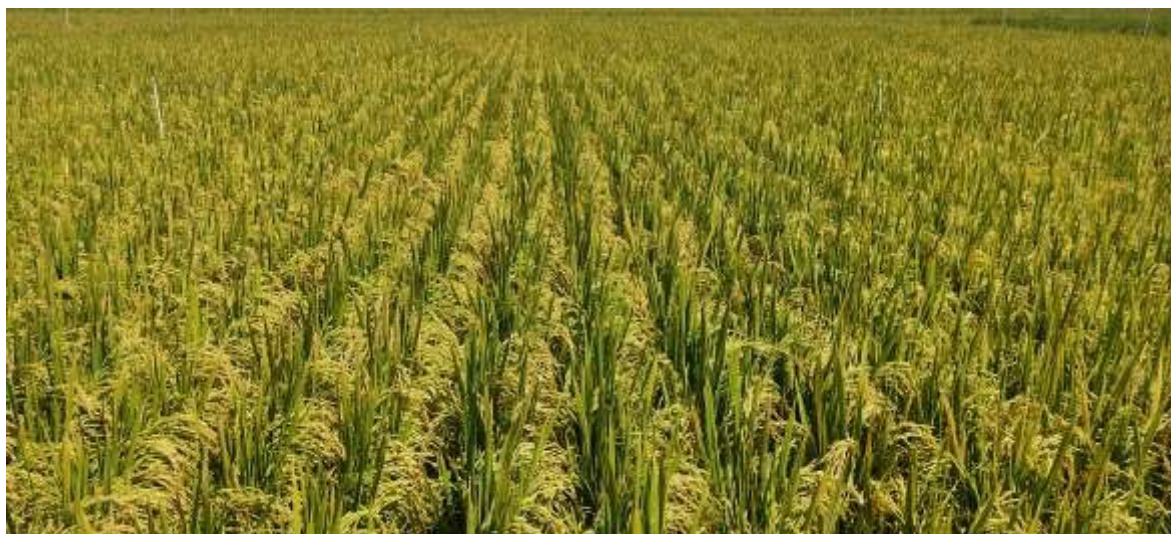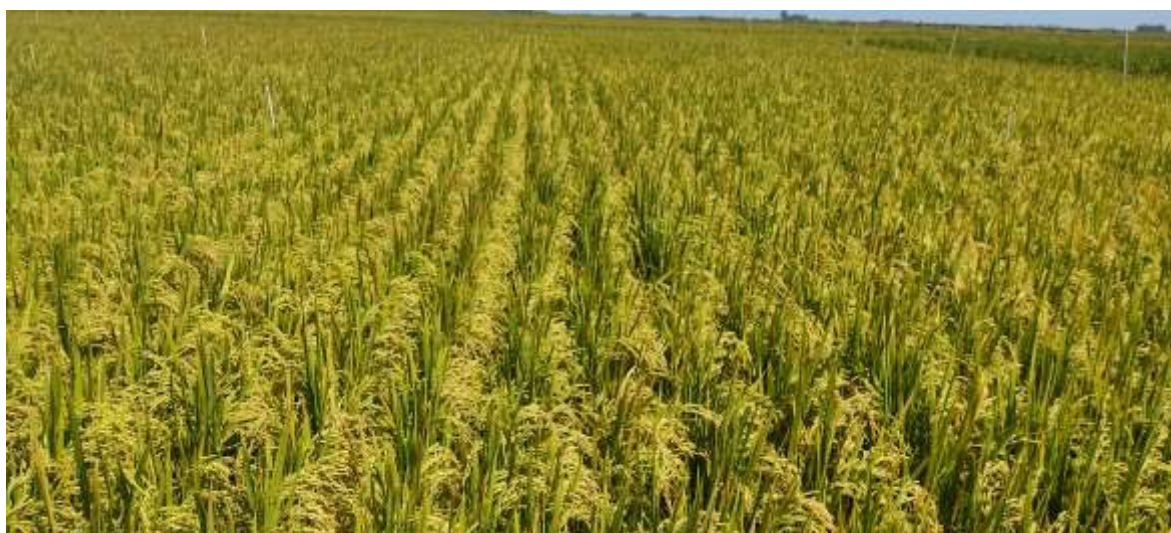

Photo 6: Treatment 4 (Humus 50 + NPK 150 applied by broadcasting) did not differ statistically from best commercial Control (only fertilizer) and NPK by Broadcast seeding).

## FINAL COMMENTS

The essay is based on a little-known topic for rice cultivation in our country: the use of the fertilizer additive Humus from the Paraguayan company Tiróleo .

Starting with the NPK fertilizer dosage recommended by a technical expert based on soil analysis, two doses of humus were tested, both in addition to and in place of the fertilizer, and compared with a commercial control (fertilizer alone). Furthermore, all treatments were applied in duplicate, incorporated into the row or broadcast as a cover crop, to compare the effectiveness of both localization methods.

The trial was installed in a commercial farm of the INIA Merín variety, which occupies 50% of the rice area, in the second section of the department of Treinta y Tres, on Planosol soils . Subeutrics Ocrícos with a silty loam texture , associated with Solods Ocrícos belonging to the La Charqueada unit.

## CONCLUSIONS

### Performance

With a general average of the test of 10287 kg/ ha , statistically significant differences were found at 5%, due to the treatments.

Treatment 5 (Humus 50 + NPK 100 applied to the line) was at the top of the yields, not differing statistically from three treatments, but significantly surpassing the rest (see graph No. 1).

The other treatments that were positioned in that first performance step were 3 (Humus 50 + NPK 150 applied in line) and 7 and 8 (Humus 20 + NPK 150 applied in line and broadcast respectively).

These four top-performing treatments achieved significant productive response over the best commercial control (only broadcast NPK fertilizer), highlighting that three of them were applied in line and one broadcast.

Grouping yields by location method, the overall average for application in the row showed a 1.6% increase compared to the average for broadcast topdressing treatments. Furthermore, the 50 + 100 and 20 + 150 doses of humus + NPK fertilizer recorded the highest average yields among all dose combinations evaluated.

Observing the different productive responses by grouping treatments by additive and fertilizer dose allows us to compare the effectiveness achieved based on the application method. The most eloquent result was recorded with the Humus 50 + NPK 100 dose, where the in-row application significantly outperformed the broadcast application. On the other hand, with the remaining dose combinations, no statistically significant differences were found based on the application method. However, in most cases, a trend of higher yield was observed for the in-row treatments compared to the broadcast treatments, except in the case of NPK fertilization alone, where the trend was the opposite (see graph 4).

Grouping the results by the location method (see graph No. 5) allows us to highlight the main conclusions drawn from this test:

- I) By applying Humus and NPK fertilizer to the line, all treatments with the bioactivator significantly outperformed the commercial control (only NPK fertilizer), with the treatment with Humus 50 + NPK 100 standing out, which was positioned at the first level of performance, but did not differ statistically from the treatments of 20 + 150 and 50 + 150, of Humus and NPK respectively.

II) When applying humus and NPK fertilizer broadcast on the cover crop, only the treatment with Humus 20 + NPK 150 significantly outperformed the commercial control (NPK fertilizer only). The other combinations did not differ statistically from the control.

In summary, four combinations of humus and NPK fertilizer achieved significant yield responses compared to the best commercial control (only broadcast NPK fertilizer). Three of these were applied in-row and one broadcast. The responses varied; in one case, the addition of humus, replacing the NPK fertilizer dose 1:1, led to a significant increase in yield, and in the remaining three cases, the response was achieved by adding the bioactivator to the NPK control dose.

*The results with the Humus fertilizer additive are promising and generate good prospects for commercial adoption. However, the technological changes it entails in terms of adjusting the base fertilizer dosage and the location method require further research and validation to generate solidly supported technical recommendations.*

**ASINAGRO**  
**AGRONOMIC ADVICE AND RESEARCH**

**TEST WITH ADDITIVE FOR FERTILIZERS HUMUS - SOYBEANS**

*Third section – Thirty-Three - Uruguay*

**2023-2024 HARVEST**

*Agricultural Engineer Hernán Zorrilla*

*Agricultural Engineer Emiliano Ferreira*

## INTRODUCTION

The essay is based on a little-known topic for soybean cultivation in our country: the use of the fertilizer additive Humus from the Paraguayan company Tiróleo .

The bioactivation of fertilizers, with additives such as humus, aims to optimize their assimilation in order to reduce their consumption, maximizing the use of nutrients and minimizing losses that affect the environment and the producers' economy.

Agricultural activities today face challenges in finding ways to ensure the preservation of natural resources for future generations, minimize environmental impacts, help mitigate climate change, and produce food of proven safety and quality.

In this context, there are various strategies and visions regarding the paths to be taken. In our case, we see a priority in advancing paths that promote gradual changes in inputs, management, and processes, reducing the environmental footprint and maintaining or improving the productivity and quality of the rice produced.

The incorporation of bioinputs , such as the additive Humus de Tyróleo , is a key tool to generate valid alternatives to a traditional sustainable and high-productivity management system.

In response to this challenge, an exact basal fertilization test using the Humus additive from the company Tiróleo was installed in the third section of the department of Treinta y Tres, on a farm where the rice-soybean rotation is carried out.

Starting with the NPK fertilizer dosage recommended by a technical expert based on soil analysis, two doses of humus were tested, both in addition to and in place of the fertilizer, and compared with a commercial control (fertilizer alone). Furthermore, all treatments were applied in duplicate, incorporated into the row or broadcast as a cover crop, to compare the effectiveness of both localization methods.

This report presents data on the test setup, materials and methods, results, statistical analysis of performance, and final comments. Illustrative photographs are also included.

## GOALS

- To evaluate the effectiveness of the fertilizer additive Humus in soybean cultivation.
- Contrast between online application and random coverage.
- Adjust the application of Humus in relation to replacement or addition with NPK fertilizer.
- Quantify its impact on crop yield.

## MATERIALS AND METHODS

**Product evaluated:** fertilizer additive

### Humus

Bioactivating additive with the same physical characteristics as a granulated fertilizer, making it suitable for mixing prior to application.

It is obtained from plant remains that go through a fermentation process where a set of microorganisms – Microbiome – are incorporated, which interact with each other , in balance and conditioned by the soil and the chemical processes that direct them.

Nutrient release depends on the existing microbiology in the soil, but the use of the additive increases this dynamic because the incorporated microbiome favors the processes that make nutrients available to plants.

**Treatments:** (Dose kg/ ha )



| TRT | Humus | NPK (1) | Location             | Relationship<br>Humus: NPK |
|-----|-------|---------|----------------------|----------------------------|
| 1-  | 0     | 200     | Line                 | Control                    |
| 2-  | 0     | 200     | Broadcast<br>seeding | Control                    |
| 3-  | 50    | 200     | Line                 | Additive                   |
| 4-  | 50    | 200     | Broadcast<br>seeding | Additive                   |
| 5-  | 50    | 150     | Line                 | Replacement<br>(2)         |
| 6-  | 50    | 150     | Broadcast<br>seeding | Replacement<br>(2)         |
| 7-  | 20    | 200     | Line                 | Additive                   |
| 8-  | 20    | 200     | Broadcast<br>seeding | Additive                   |
| 9-  | 20    | 150     | Line                 | Replacement<br>(3)         |
| 10- | 20    | 150     | Broadcast<br>seeding | Replacement<br>(3)         |

(1) NPK base fertilizer: 0 – 20/20 – 30

(2) Complete 1:1 replacement with 25% reduction in NPK dosage

(3) Partial replacement 0.4:1 with 25% reduction in NPK dosage

## Design

Random blocks with three repetitions

Plots of 20 m<sup>2</sup> (4 m wide by 5 m long).

### Distribution of treatments:

|    |   |   |    |    |
|----|---|---|----|----|
|    |   |   |    | 6  |
|    |   | 5 | 7  | 4  |
| 3  | 9 | 2 | 10 | 1  |
| 1  | 3 | 5 | 7  | 9  |
| 2  | 4 | 6 | 8  | 10 |
| 10 | 9 | 8 | 7  | 6  |
| 1  | 2 | 3 | 4  | 5  |

## Test facility

| Locality | Producer        | Planting date | Cultivate |
|----------|-----------------|---------------|-----------|
| Vergara  | Hernán Zorrilla | December 1st  | DM 60i62  |

Representative location of the traditional rice-growing basin of Laguna Merín, the area included in the third section of the department of Treinta y Tres corresponds to the "Rincón de Ramírez"

unit of the Soil Recognition Chart of Uruguay, scale 1:1,000,000, and the soil where the test was installed is a Planosol Distric Ocher with a silty loam texture.

### Soil analysis -

Predecessor: rice stubble

Management: Spring glyphosate – pre-tillage (disk and leveling)

|                       |      |
|-----------------------|------|
| pH (H <sub>2</sub> O) | 5.5  |
| MO (%)                | 1.8  |
| P – citric acid (ppm) | 6    |
| K ( meq /100 gr soil) | 0.21 |

### Recommended Dose

The recommendation for phosphorus and potassium fertilization for soybeans is determined based on soil chemical analysis and the production system that alternates soybeans with rice in a 1:1 rotation.

- P<sub>2</sub>O<sub>5</sub> = 40 units / ha
- K<sub>2</sub>O = 60 units / ha

For the commercial Control NPK (0 - 20/20 - 30) it is adjusted to 200 kg/ ha (treatment 1).

### Description of the environment

The trial was installed in a rice crop, planted on a Planosol Distric Ochric with a silty loam texture belonging to the Rincón de Ramírez unit.

The planting date for the farm is early December, with the Don Mario genetic variety, DM 60i62 IPRO , with a short sixth cycle and indeterminate growth habit. Its main characteristics include its excellent adaptation to medium-yield environments and rice plain soils.

**Crop management:**

Sowing:

Date: 1st-12-2023

Sowing conditions: Good sowing preparation

Soil with good humidity

Planting type: row – seeder: John Deere planter

Variety: DM 60i62 IPRO / Sowing density: 13 seeds/m linear

Basal fertilization:

Date: 6-12-23 with the germinated culture

Dosage: according to treatments

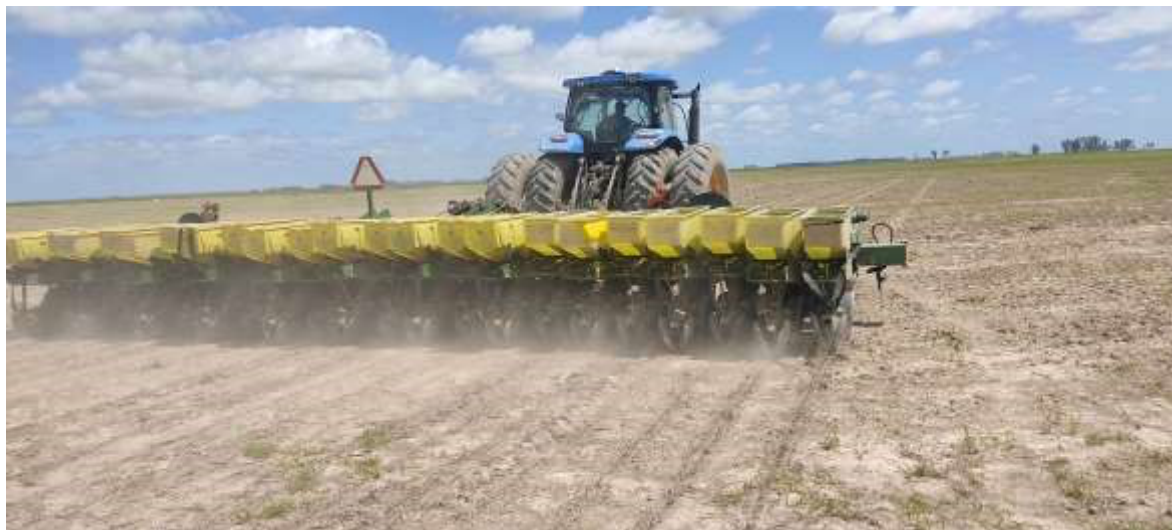

Photo 1 – Sowing the test.

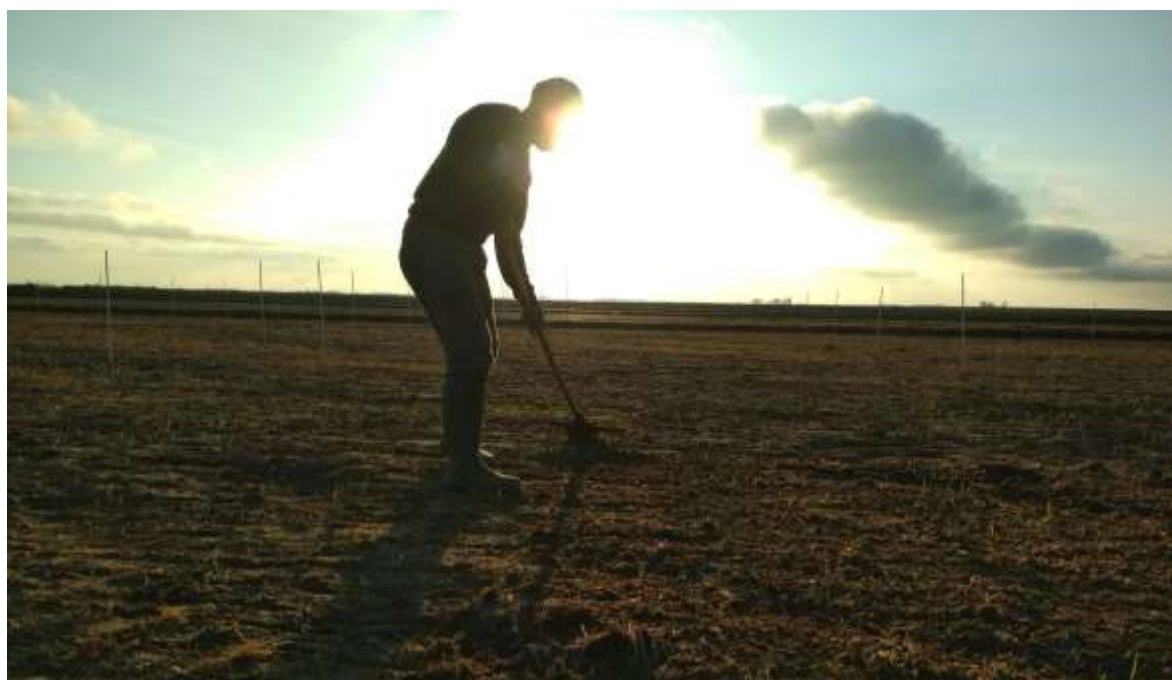

Photo 2 – Installation of the test with location of Humus and NPK fertilizer in the furrow for treatments

Climatic characterization of the harvest determining the yield potential

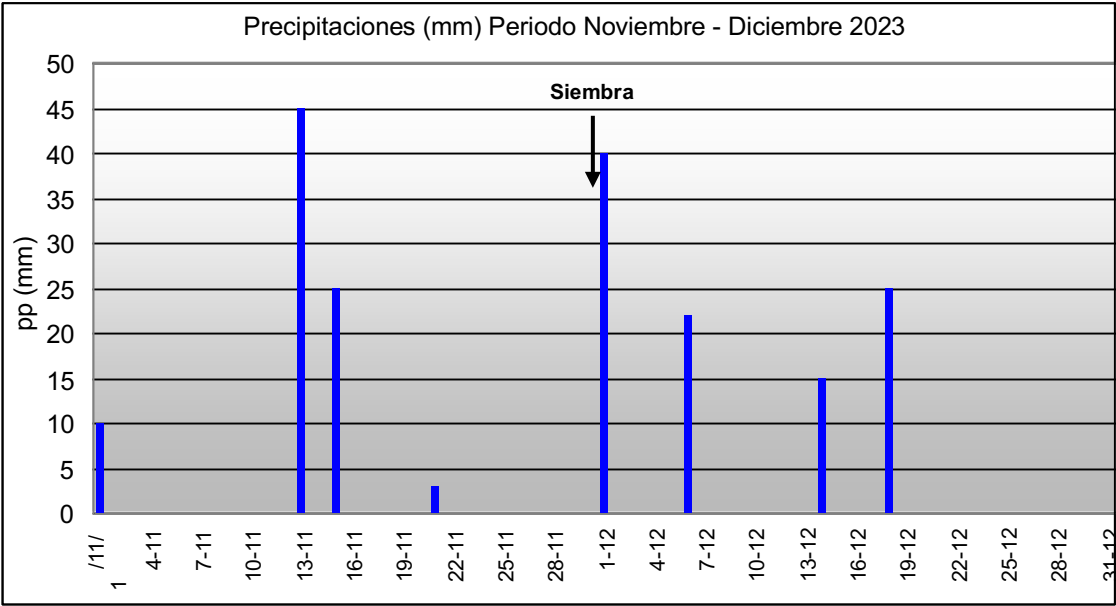

Chart I – Daily rainfall (mm) – Period November – December 2023 Source: Producer's own data.

Immediately after sowing, rainfall occurred which, due to its volume, could affect the establishment of the crop on soils with flat topography and poor drainage. However, in the trial, a good recovery of plants was achieved, achieving a population of 280,000 plants/ ha .

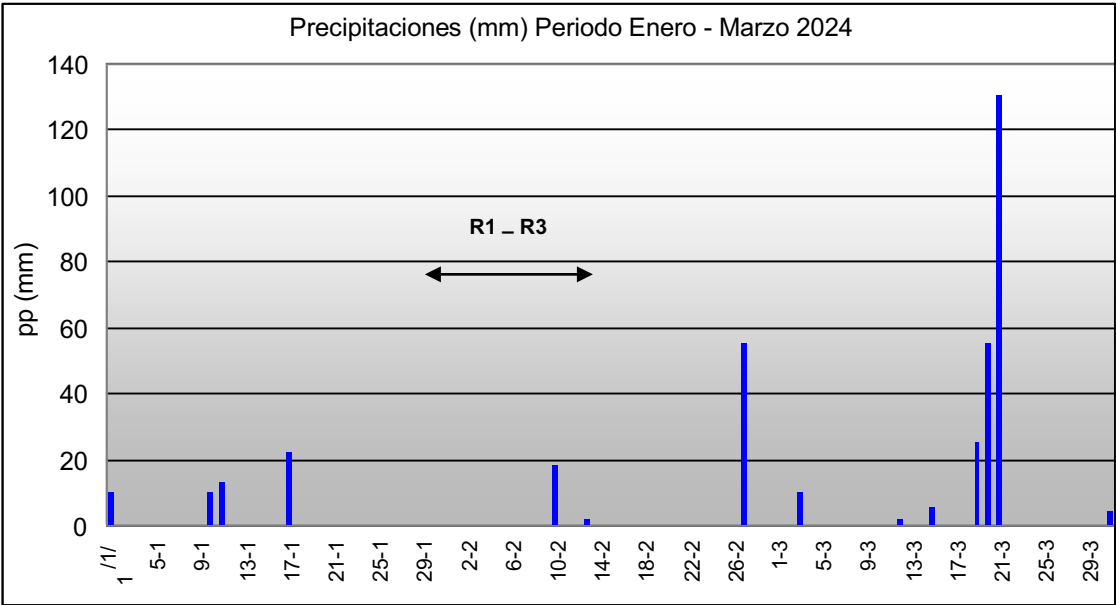

Graph II – Daily rainfall (mm) – Period January – March 2024 Source: Producer's own data.

Prior to and during the critical yield-generating stage, between R1 and R3, there was no significant rainfall, but the crop nevertheless showed acceptable development and realized very good yield potential, favored by timely rainfall during grain filling.



## EVALUATIONS

### Plant development – 35 days after emergence –

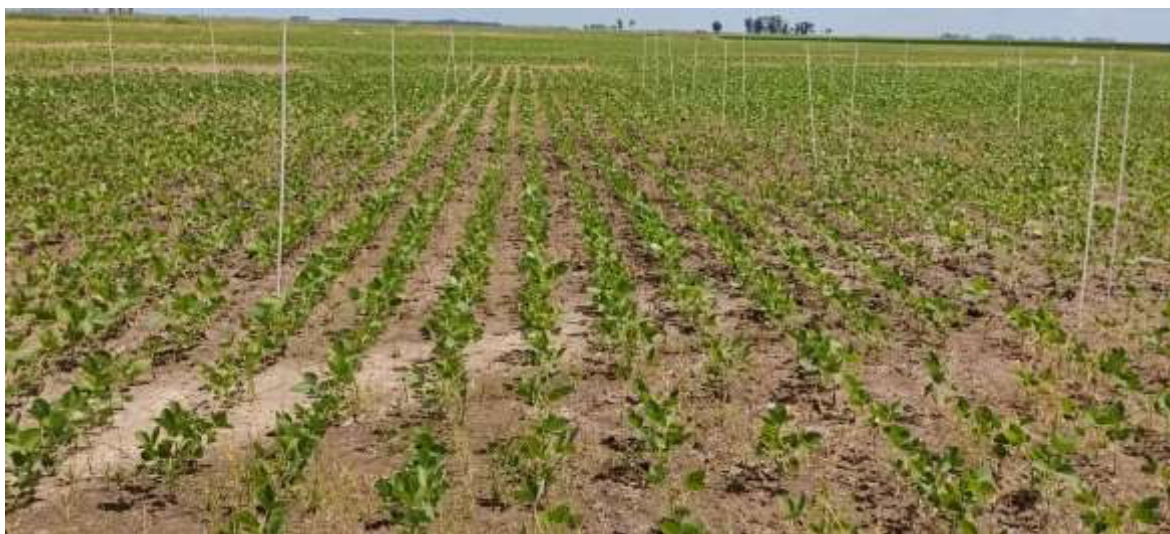

Photo 3: In the foreground, treatment 10 (Humus 20 + NPK 150 applied broadcast). In the background, treatment 9 (same dose but placed in a row) was seen to have developed more than the treatment mentioned above, 35 days after emergence.

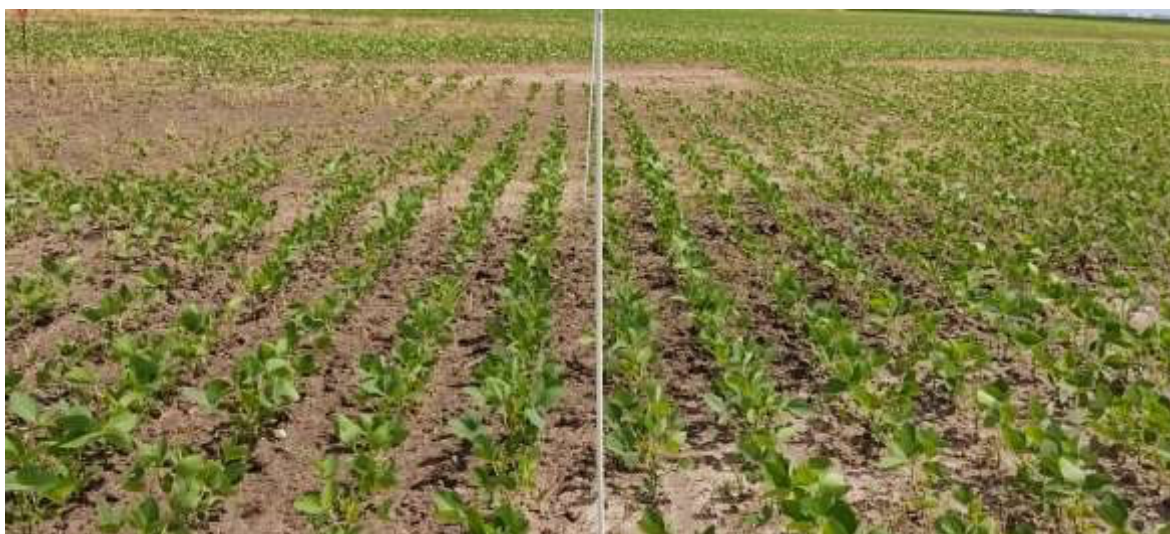

Photo 4: On the left, treatment 5 (Humus 50 + NPK 150 applied in the row). On the right Treatment 7 (20 + 200). They presented similar plant development in the first evaluation.

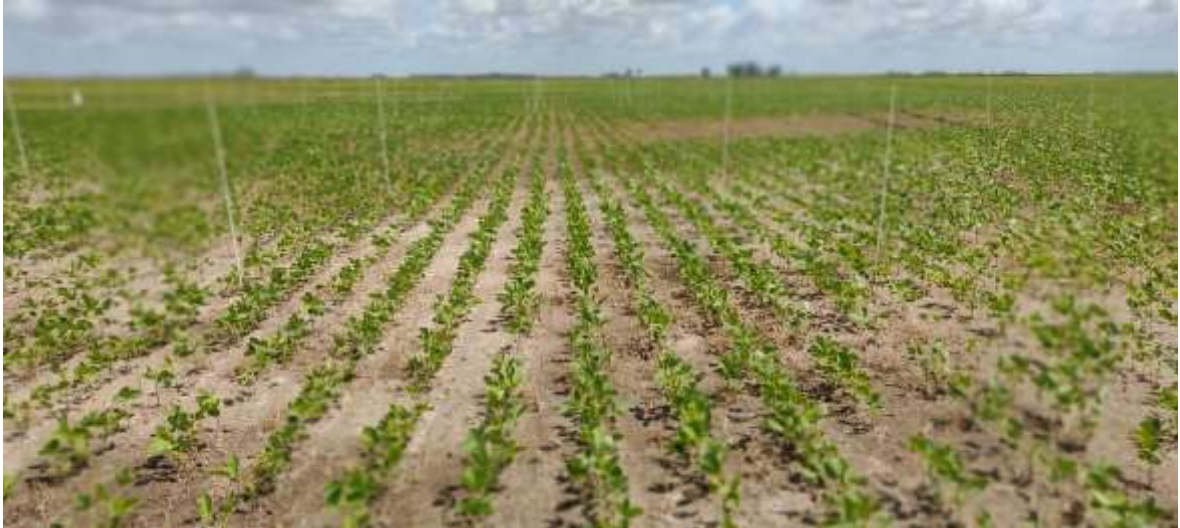

Photo 5: Treatment 5 in the foreground (Humus 50 + NPK 150 located on the line). In the background Treatment 6 (same dose but applied randomly). They showed a similar development of plants, 35 days after emergence.



**Plant development – 55 days after emergence –**

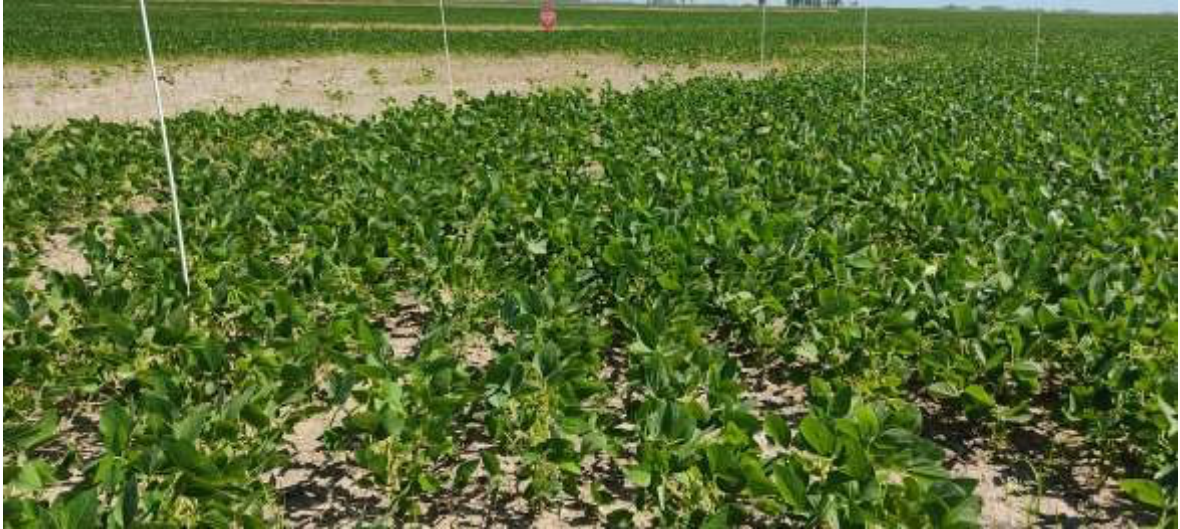

Photo 6: In the foreground is the commercial control (NPK 200 applied in line). In the background is located the treatment 3 (Humus 50 + NPK 200 in line) with greater plant development and inter-row coverage than the Control, 55 days after the emergency.

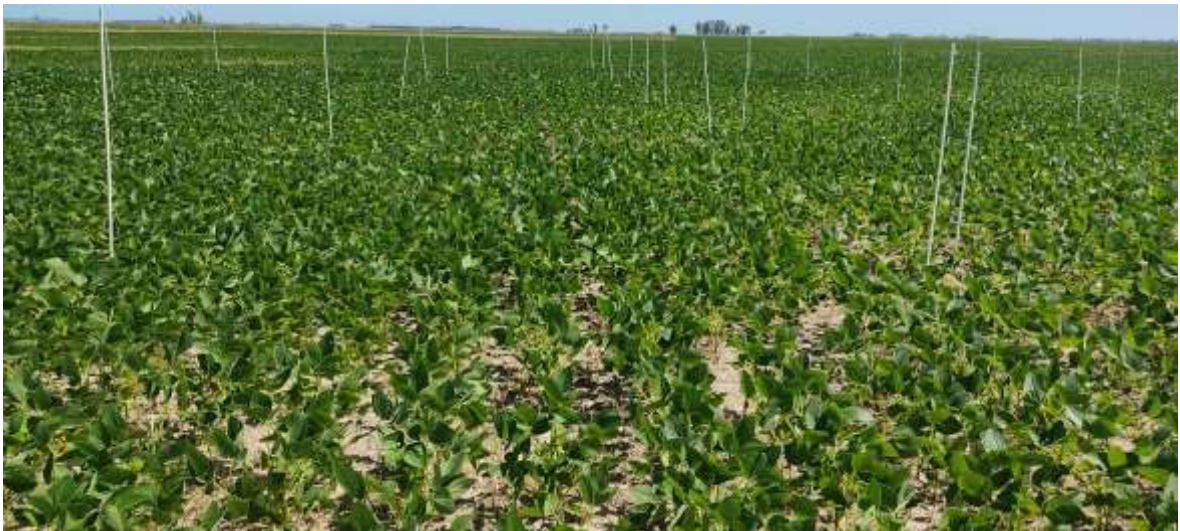

Photo 7: In the foreground, treatment 10 (Humus 20 + NPK 150 applied broadcast). In the background, treatment 9 (same dose but placed in a row) was seen to have developed more than the treatment mentioned above, 55 days after emergence.

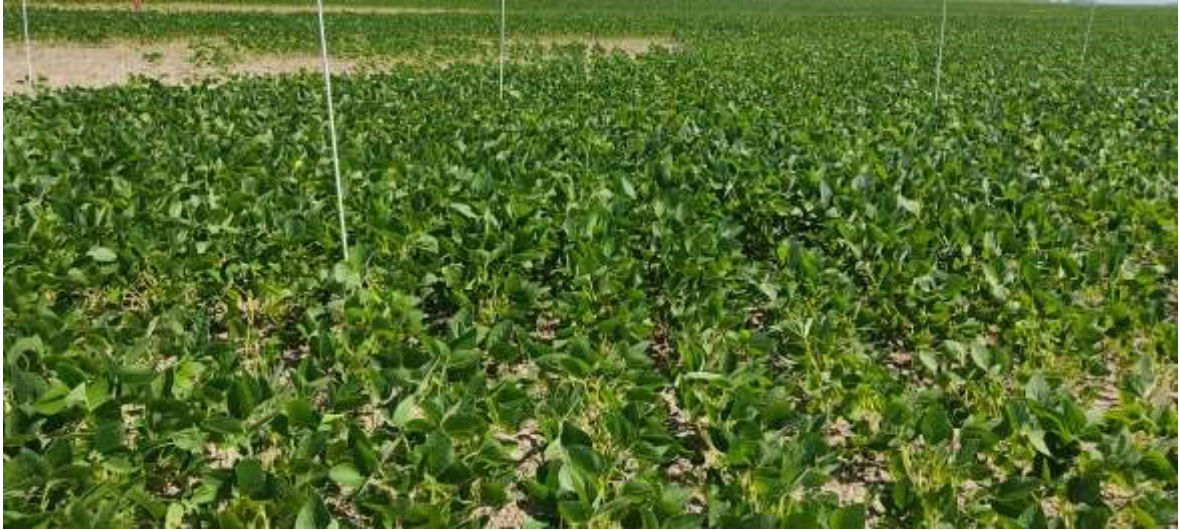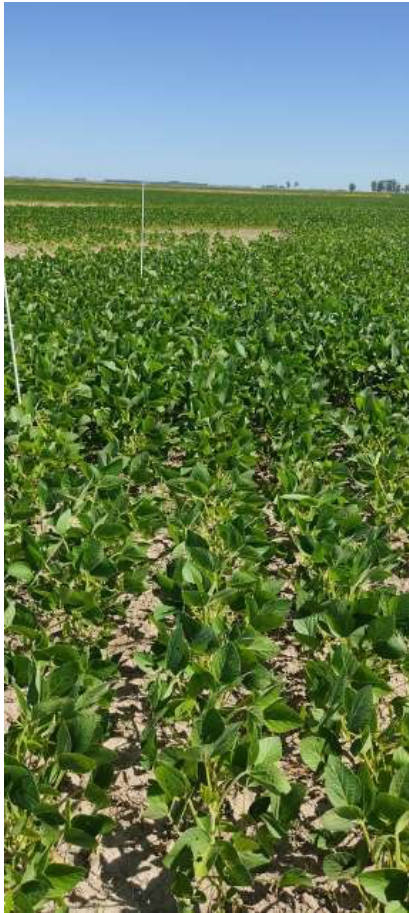

Photos 8 and 9: In the foreground, the commercial control (NPK 200 applied broadcast). In the background, treatment 7 (Humus 20 + NPK 200 applied in the row) with a notable response in plant development and inter-row coverage, 55 days after emergence.



**Root development – 65 days after emergence –**

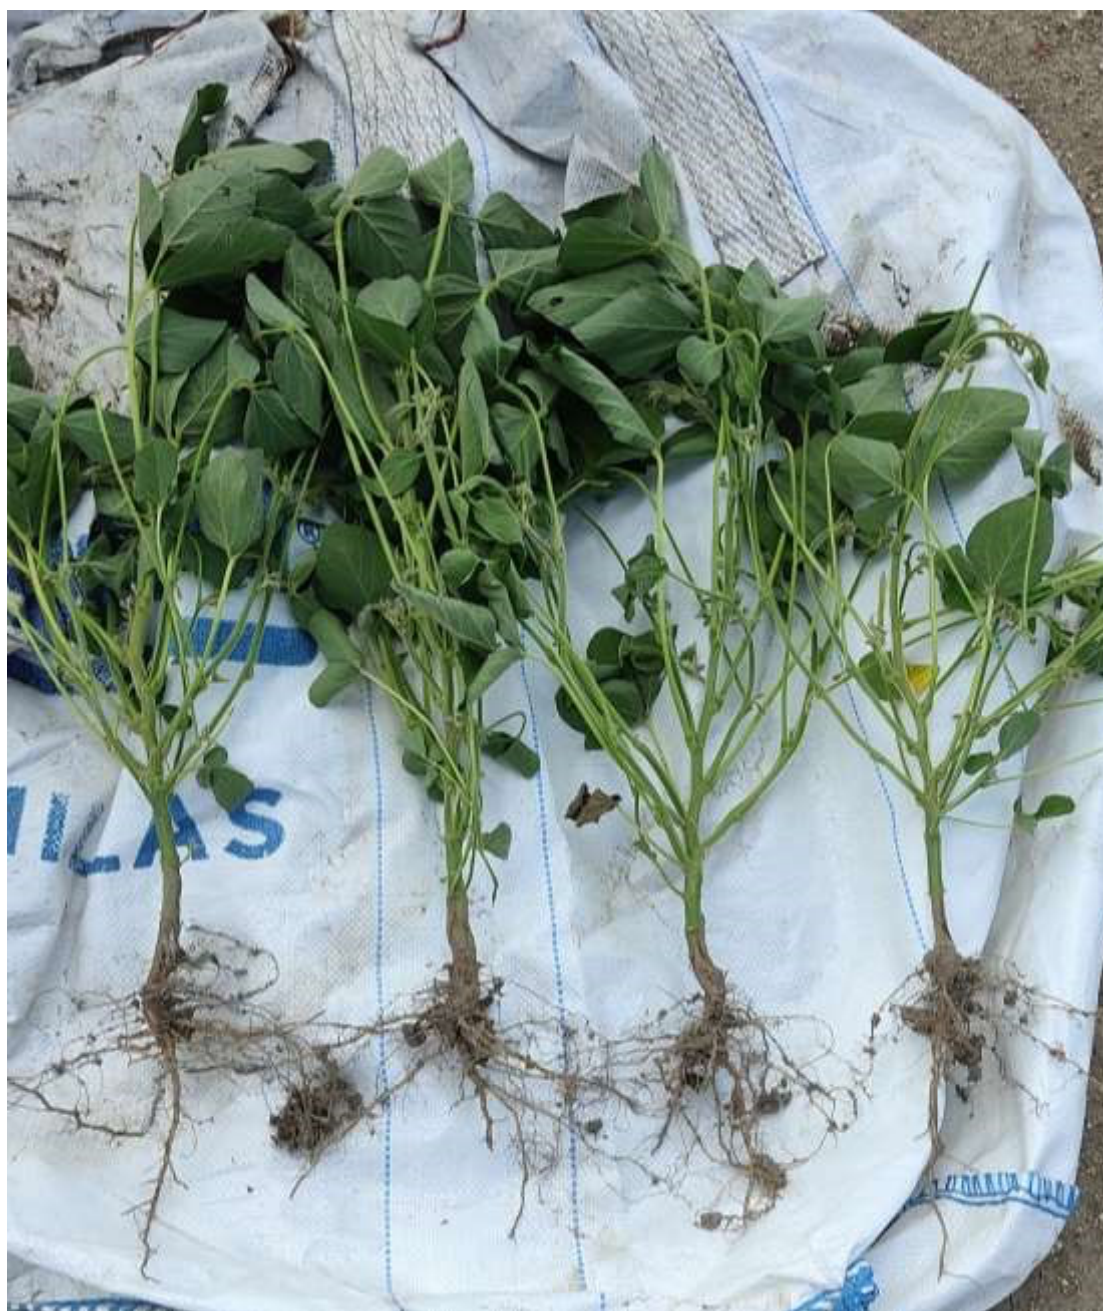

TRT. 3 (50 + 200 line) / TRT. 4 (50 + 200 broadcast seeding) / TRT. 7 (20 + 200 line) / TRT. 8 (20 + 200 broadcast seeding)

Small differences in root size were observed in favor of treatments with higher doses of humus, regardless of the location method. The superior root development was reflected in the aerial parts of the crop, with greater plant development.

### Plant development – 85 days after emergence –

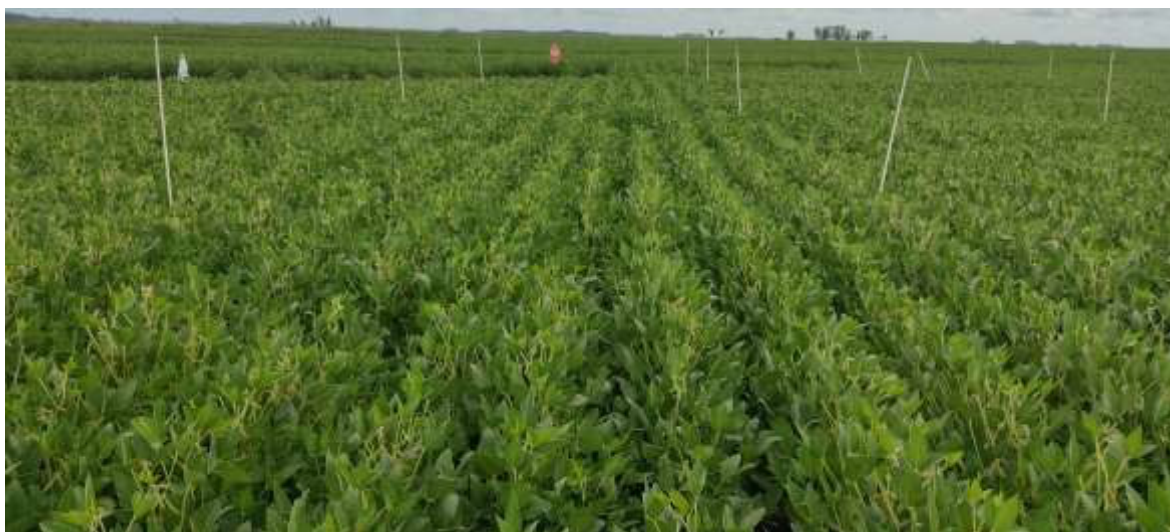

Photo 11: in the foreground the commercial Control (NPK 200 applied broadcast) and in the background the Control commercial applied in the line. The first mentioned showed a slightly higher development of plants , 85 days after emergence.

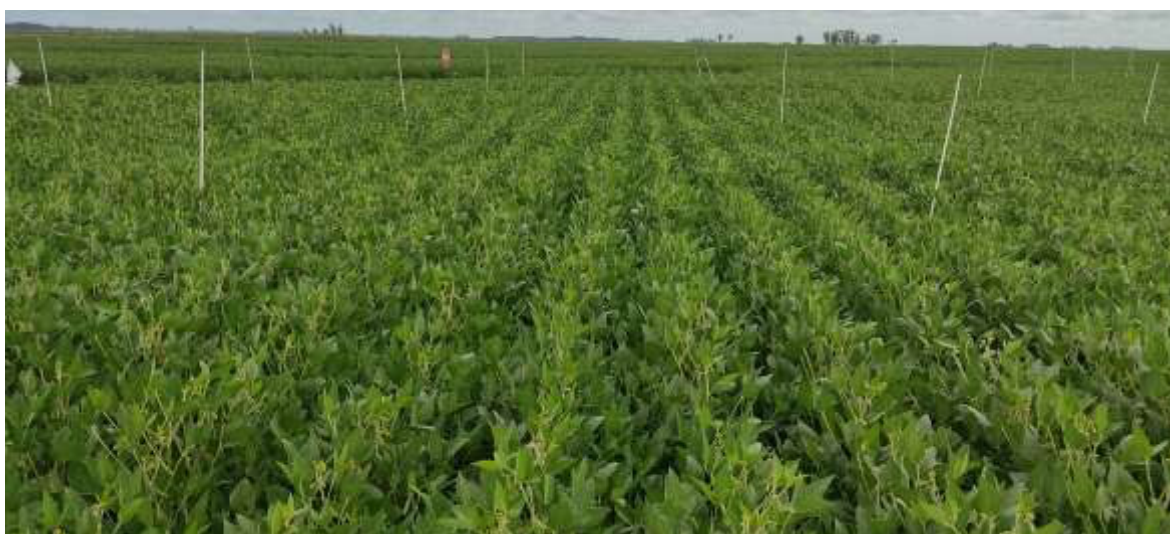

Photo 12: in the foreground treatment 4 (Humus 20 + NPK 150 applied by broadcasting) and in the background the Treatment 3 (same dose but located online), did not record significant differences in the **plant** development , 85 days after emergence.



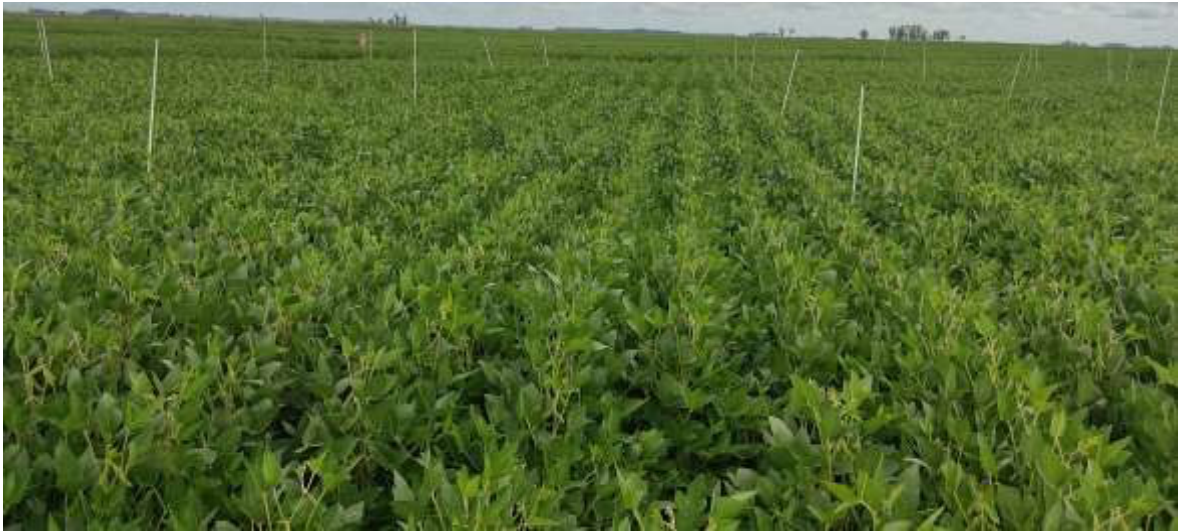

Photo 13: in the foreground treatment 6 (Humus 20 + NPK 150 applied by broadcasting) and in the background the Treatment 5 (same dose but located online). The first one was highlighted by a superior plant development, 85 days after emergence.

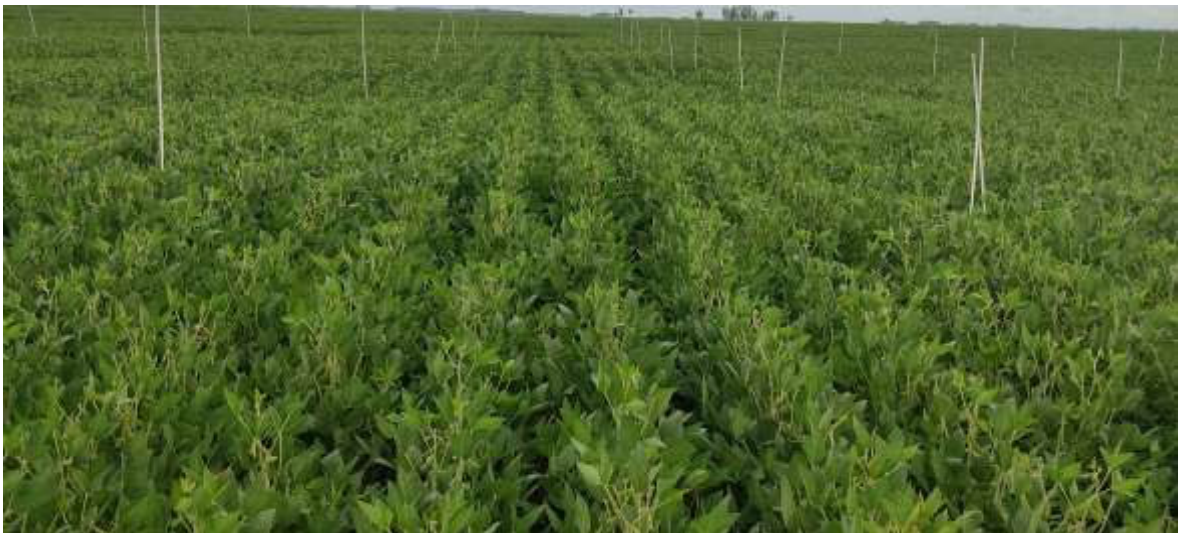

Photo 14: in the foreground treatment 10 (Humus 20 + NPK 150 applied by broadcasting) and in the background Treatment 9 (same dose but located online). As in the evaluations Previously , the latter was observed with greater plant development than the former.

## **PERFORMANCES**

Kg/ ha corrected to 12% humidity

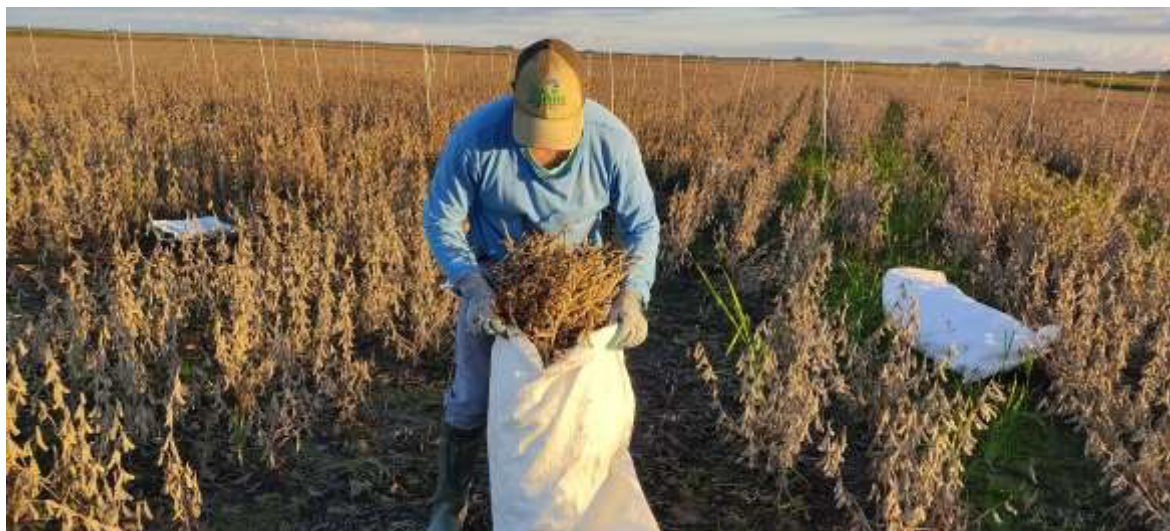

| Treatments | Yo   | II   | III  | Average |
|------------|------|------|------|---------|
| 1          | 3400 | 3225 | 3550 | 3392    |
| 2          | 3250 | 3400 | 3600 | 3417    |
| 3          | 4000 | 3700 | 3800 | 3833    |
| 4          | 3450 | 3675 | 3775 | 3633    |
| 5          | 3875 | 3975 | 4025 | 3958    |
| 6          | 4075 | 4350 | 4300 | 4242    |
| 7          | 4200 | 4125 | 3925 | 4083    |
| 8          | 3775 | 4000 | 3525 | 3767    |
| 9          | 3375 | 3650 | 3500 | 3508    |
| 10         | 3325 | 3675 | 3275 | 3425    |

□ Overall average of the test: 3726 kg/ ha

| TRT | Humus | NPK | Location          |
|-----|-------|-----|-------------------|
| 1-  | 0     | 200 | Line              |
| 2-  | 0     | 200 | Broadcast seeding |
| 3-  | 50    | 200 | Line              |
| 4-  | 50    | 200 | Broadcast seeding |
| 5-  | 50    | 150 | Line              |
| 6-  | 50    | 150 | Broadcast seeding |
| 7-  | 20    | 200 | Line              |
| 8-  | 20    | 200 | Broadcast seeding |
| 9-  | 20    | 150 | Line              |
| 10- | 20    | 150 | Broadcast seeding |

### STATISTICAL ANALYSIS

| FV         | gl | SC      | CM     | F      |
|------------|----|---------|--------|--------|
| Blocks     | 2  | 55167   | 27583  |        |
| Treatments | 9  | 2444354 | 271595 | 9.73 * |
| Mistake    | 18 | 502333  | 27907  |        |
| Total      | 29 | 3001854 |        |        |

CV: 4.48%

With a general average of the test of 3726 kg/ ha , statistically significant differences were found at 5%, due to the treatments.

| Treatments | Average Yield (kg/ ha ) |
|------------|-------------------------|
| 6          | 4242 to                 |
| 7          | 4083 ab                 |
| 5          | 3958 bc                 |
| 3          | 3833 CD                 |
| 8          | 3767 CD                 |
| 4          | 3633 of                 |
| 9          | 3508 ef                 |
| 10         | 3425 F                  |
| 2          | 3417 F                  |
| 1          | 3392 F                  |

DMS = 203 kg/ ha

Means with a common letter are not significantly different ( $p > 0.05$ )

| TRT | Humus | NPK | Location          |
|-----|-------|-----|-------------------|
| 1-  | 0     | 200 | Line              |
| 2-  | 0     | 200 | Broadcast seeding |
| 3-  | 50    | 200 | Line              |
| 4-  | 50    | 200 | Broadcast seeding |
| 5-  | 50    | 150 | Line              |
| 6-  | 50    | 150 | Broadcast seeding |
| 7-  | 20    | 200 | Line              |
| 8-  | 20    | 200 | Broadcast seeding |
| 9-  | 20    | 150 | Line              |
| 10- | 20    | 150 | Broadcast seeding |

## Average yield per treatment

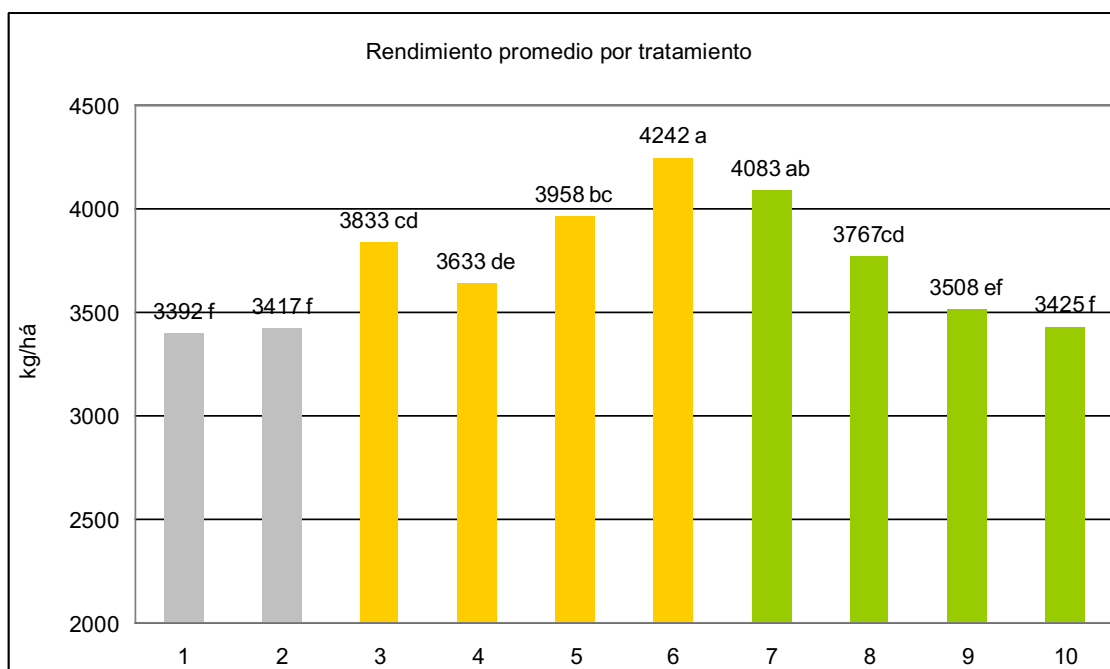

Chart No. 1 - Average yield (kg/ ha ) per treatment. With separation of averages.

Means with a common letter are not significantly different ( $p > 0.05$ )

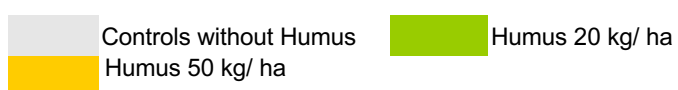

| TRT | Humus | NPK | Location          |
|-----|-------|-----|-------------------|
| 1-  | 0     | 200 | Line              |
| 2-  | 0     | 200 | Broadcast seeding |
| 3-  | 50    | 200 | Line              |
| 4-  | 50    | 200 | Broadcast seeding |
| 5-  | 50    | 150 | Line              |
| 6-  | 50    | 150 | Broadcast seeding |
| 7-  | 20    | 200 | Line              |
| 8-  | 20    | 200 | Broadcast seeding |
| 9-  | 20    | 150 | Line              |
| 10- | 20    | 150 | Broadcast seeding |

### Ordered decreasing average yield and productive response

| Treatments | Rend Average ( kg/ ha ) | Productive response ( % ) (1) |
|------------|-------------------------|-------------------------------|
| 6          | 4242                    | 125                           |
| 7          | 4083                    | 120                           |
| 5          | 3958                    | 117                           |
| 3          | 3833                    | 113                           |
| 8          | 3767                    | 111                           |
| 4          | 3633                    | 107                           |
| 9          | 3508                    | 103                           |
| 10         | 3425                    | 101                           |
| 2          | 3417                    | 101                           |
| 1          | 3392                    | 100                           |

(1) Productive response on the commercial Control (treatment 1)\_ Base = 100%

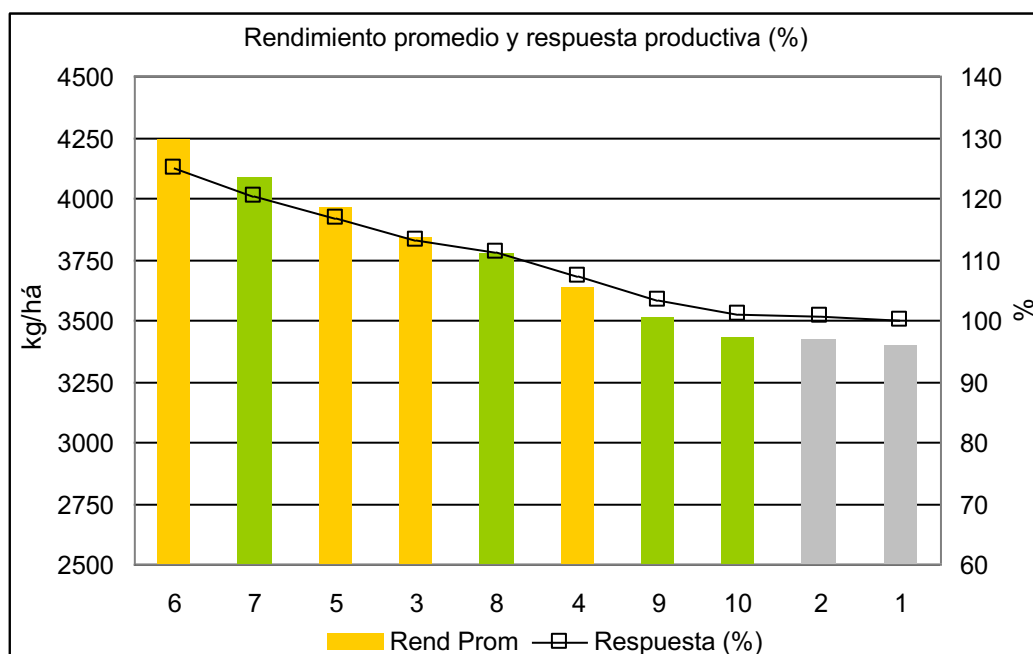

Graph No. 2 - Average yield ordered decreasing (kg/ ha ) and productive response (%)

Controls without Humus  
 50 kg/ ha  
 Humus 20 kg/ ha

| TRT | Humus | NPK | Location          |
|-----|-------|-----|-------------------|
| 1-  | 0     | 200 | Line              |
| 2-  | 0     | 200 | Broadcast seeding |
| 3-  | 50    | 200 | Line              |
| 4-  | 50    | 200 | Broadcast seeding |
| 5-  | 50    | 150 | Line              |
| 6-  | 50    | 150 | Broadcast seeding |

|     |    |     |                   |
|-----|----|-----|-------------------|
| 7-  | 20 | 200 | Line              |
| 8-  | 20 | 200 | Broadcast seeding |
| 9-  | 20 | 150 | Line              |
| 10- | 20 | 150 | Broadcast seeding |

Average yields (kg/ ha ) grouped by:

- 1- Humus and NPK fertilizer dosage
- 2- Localization method

| Dose (kg/ ha ) (1) | Line | Broadcast seeding | Average |
|--------------------|------|-------------------|---------|
| 0 + 200            | 3392 | 3417              | 3405    |
| 20 + 150           | 3508 | 3425              | 3467    |
| 50 + 150           | 3958 | 4242              | 4100    |
| 20 + 200           | 4083 | 3767              | 3925    |
| 50 + 200           | 3833 | 3633              | 3733    |
| Average            | 3755 | 3697              |         |

(1): Humus + Fertilizer

Grouping yields by location method, the overall average for in-line applications showed a 1.6% increase compared to the average for broadcast treatments applied to the cover crop.

The doses of 50 + 150 and 20 + 200, of Humus + NPK fertilizer, recorded the highest average yield, considering all the dose combinations evaluated.

**Yields (kg/ ha ) depending on the response to doses of Humus + NPK fertilizer**

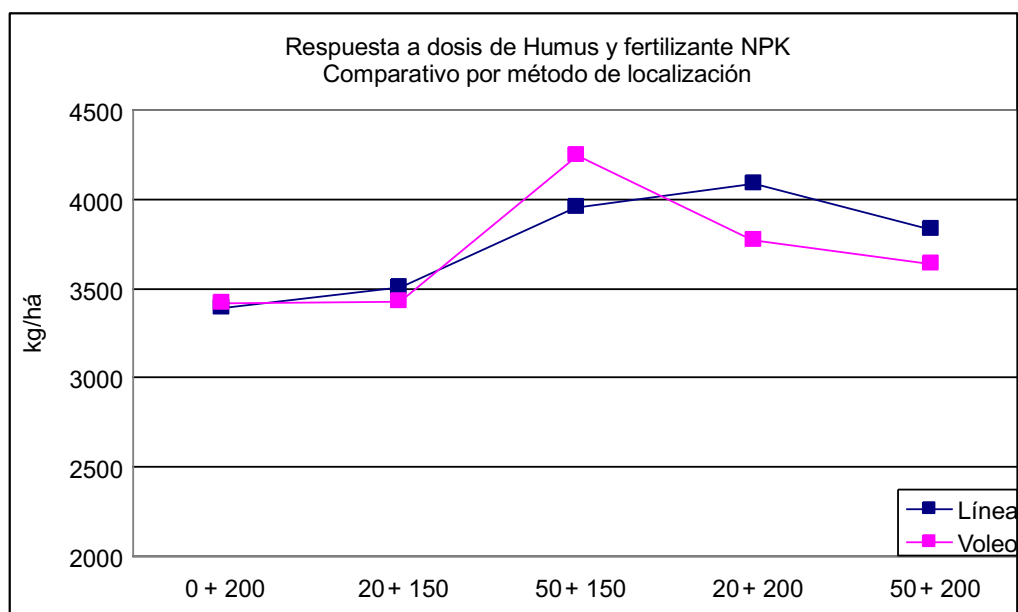

Chart 3 - Response to doses of humus + NPK fertilizer. Comparison of different localization methods.



### Yields grouped by dose of Humus and NPK fertilizer

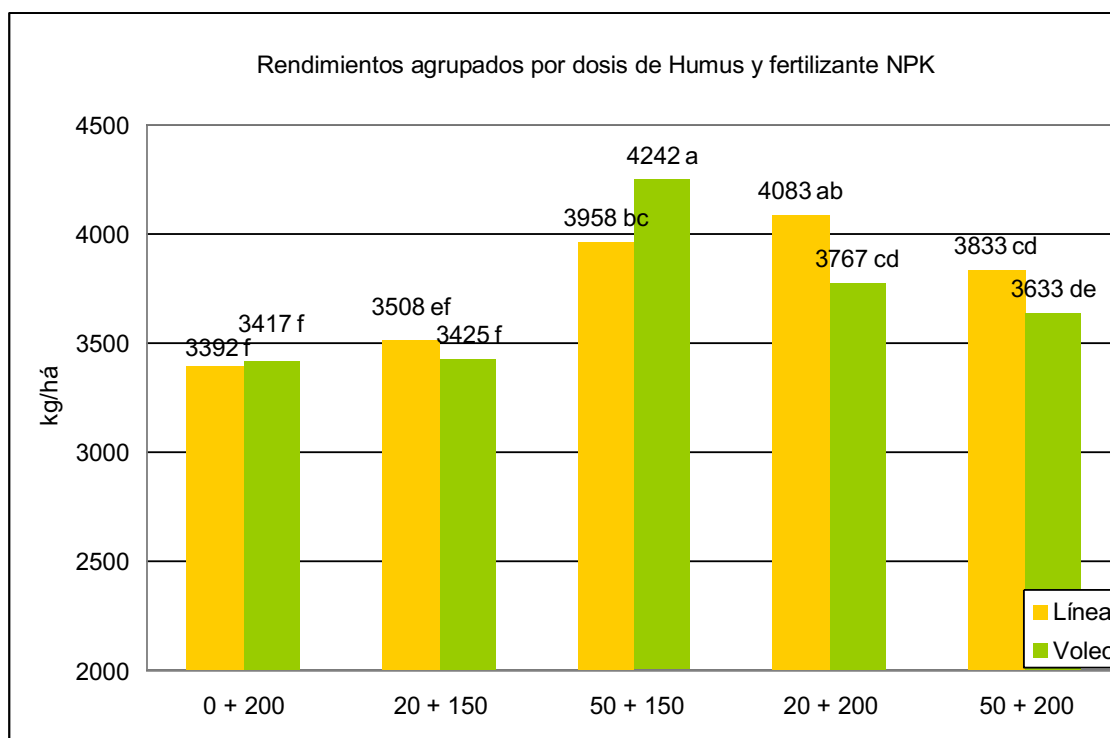

Chart 4 - Yields grouped by dose of humus and NPK fertilizer. With separation of averages.

Means with a common letter are not significantly different ( $p > 0.05$ )

- ❑ With the Humus 50 + NPK 150 dose, broadcast application significantly outperformed the on-row application. On the other hand, with the Humus 20 + NPK 200 dose, the result was the opposite, with the on-row application significantly more effective.
- ❑ In the remaining dose combinations, including commercial controls, no statistically significant differences were found by location method.

### Yields grouped by location method

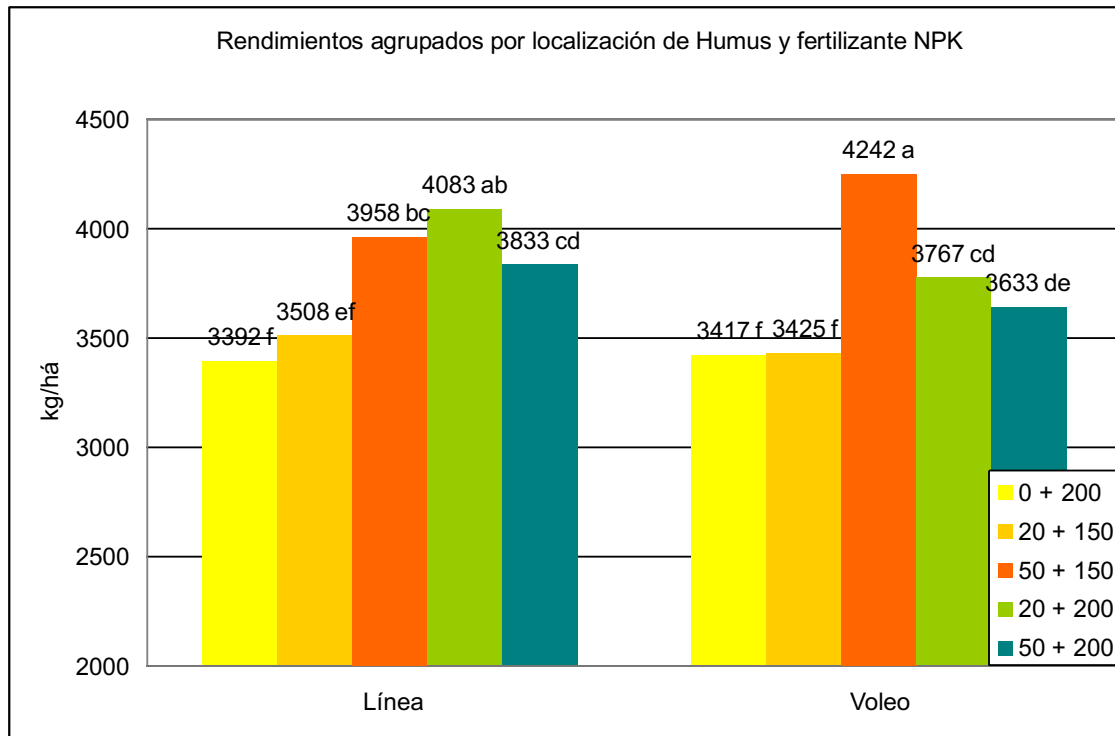

Chart 5 - Yields grouped by location method. With mean separation.

Means with a common letter are not significantly different ( $p > 0.05$ )

- ❑ For both online and broadcast location, all treatments with Humus + NPK fertilizer, except those with the lowest dose (20 + 150), significantly outperformed the commercial controls (only NPK fertilizer).
- ❑ With the application in the line, the treatment with Humus 20 + NPK 200 stood out, positioning itself in a first step of performance, but did not differ statistically from the treatment of 50 + 150.
- ❑ Broadcast application of the Humus 50 + NPK 150 treatment resulted in the highest yield, significantly surpassing the rest.
- ❑ In general terms, six combinations of Humus and NPK fertilizer achieved significant productive response over commercial controls (only NPK fertilizer), three of them were applied in line and the other three broadcast.
- ❑ The responses were variable, but in the line the most notable treatment was adding Humus to the NPK fertilizer and in the case of broadcast application the addition of Humus replacing the NPK fertilizer dose 1:1 caused a significant increase in yield.

Photo of the same dose but located on line 15: in the foreground the commercial Control. They were located at the last performance step, NPK 200 applied by broadcasting and in the background the Control with

being significantly surpassed by most treatments applied with Humus + NPK fertilizer.

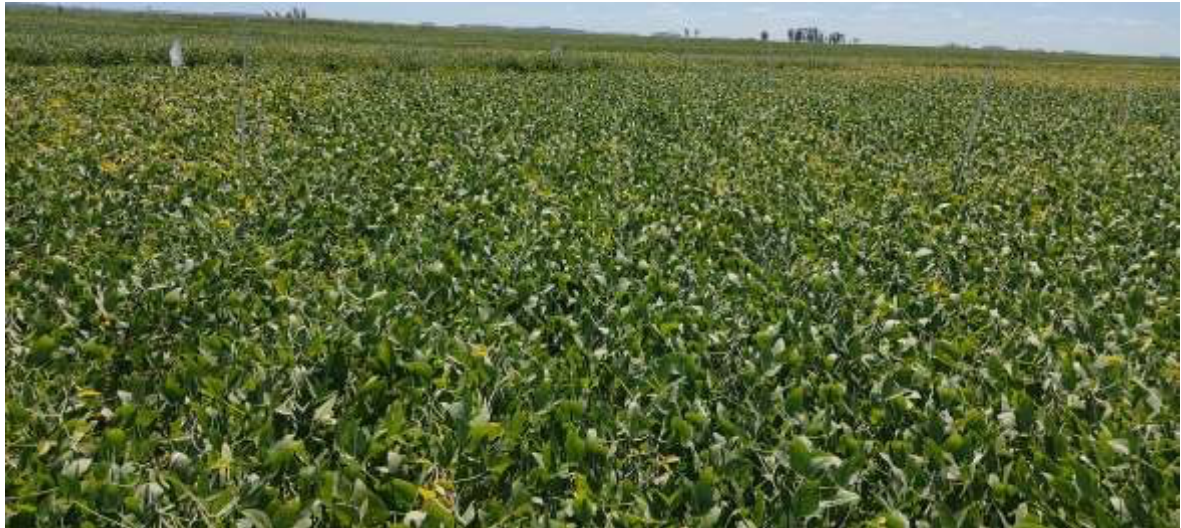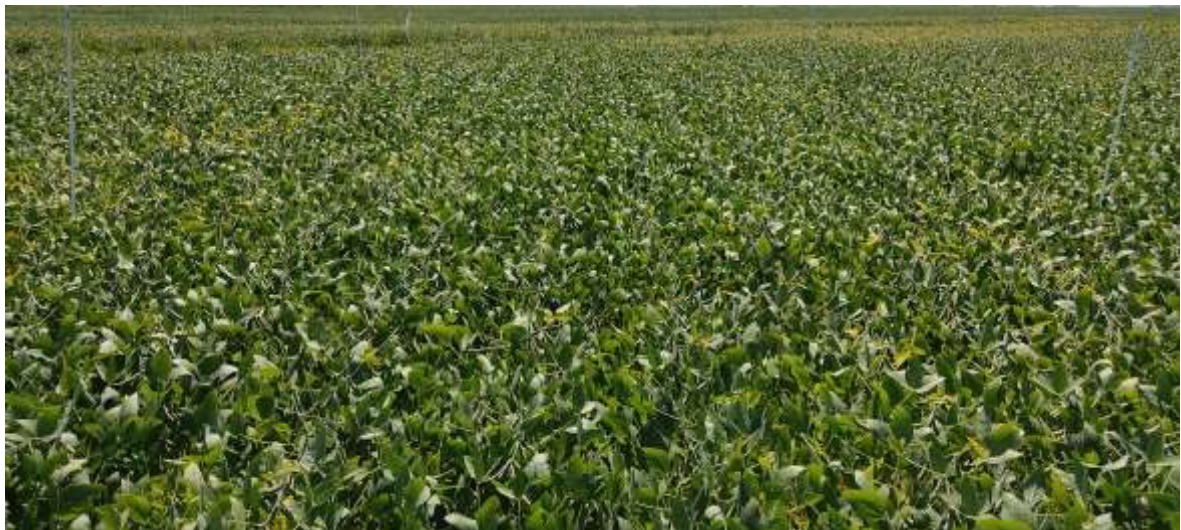

Photo 16: in the foreground treatment 4 (Humus 50 + NPK 200 applied by broadcasting), in the background the Treatment 3 (same dose but located on the line). They did not differ statistically from each other , but significantly outperformed commercial controls (NPK fertilizer only).

## **FINAL COMMENTS**

The essay is based on a little-known topic for soybean cultivation in our country: the use of the fertilizer additive Humus from the Paraguayan company Tiróleo .

Starting with the NPK fertilizer dosage recommended by a technical expert based on soil analysis, two doses of humus were tested, both in addition to and in place of the fertilizer, and compared with a commercial control (fertilizer alone). Furthermore, all treatments were applied in duplicate, incorporated into the row or broadcast as a cover crop, to compare the effectiveness of both localization methods.

The trial was installed in a commercial field of the DM 60i62 IPRO variety, which reached a population of 280,000 plants/ ha and was located in the third section of the Treinta y Tres department, on Planosol soils. Dystrics Ochrics with a silty loam texture belonging to the Rincón de Ramírez unit.

## **CONCLUSIONS**

### **Performance**

With a general average of the test of 3726 kg/ ha , statistically significant differences were found at 5%, due to the treatments.

Treatment 6 (Humus 50 + NPK 150 applied broadcast) was at the top of the yields, not differing statistically from treatment 7 (Humus 20 + NPK 200 applied in the line), but significantly surpassing the rest (see graph No. 1).

These higher performance treatments achieved significant productive response between 20 and 25% over commercial controls (NPK fertilizer only) (see graph No. 2).

Grouping yields by location method, the overall average for application in the row showed a 1.6% increase compared to the average for broadcast topdressing treatments. Furthermore, the 50 + 150 and 20 + 200 doses of humus + NPK fertilizer recorded the highest average yields among all dose combinations evaluated.

Observing the different productive responses grouping treatments by additive and fertilizer dose allows us to compare the effectiveness achieved based on the location method. The most eloquent results were recorded with the Humus 50 + NPK 150 dose, where the broadcast application treatment significantly exceeded the in-row location treatment. With the Humus 20 + NPK 200 dose, the result was the opposite, with the in-row location being significantly more prominent. On the other hand, with the remaining dose combinations, including the commercial controls, no statistically significant differences were found based on the location method (see graph 4).

Grouping the results by the location method (see graph No. 5) allows us to highlight the main conclusions drawn from this test:

- I) For both in-line and broadcast application, all treatments with Humus + NPK fertilizer, except those with the lowest dose (20 + 150), significantly outperformed the commercial controls (only NPK fertilizer).
- II) With the application in the line, the treatment with Humus 20 + NPK 200 stood out, positioning itself in a first step of performance, but did not differ statistically from the treatment of 50 + 150. Applying broadcast in coverage, the treatment with Humus 50 + NPK 150 was placed at the top of the yields, significantly surpassing the rest.

In summary, six combinations of humus and NPK fertilizer achieved significant yield responses compared to commercial controls (NPK fertilizer alone). Three of these were applied in rows and the other three were broadcast. Responses varied, but in rows, the most notable treatment was adding humus to the NPK fertilizer. In the case of broadcast application, the addition of humus, replacing the NPK fertilizer dose 1:1, led to a significant increase in yield.

*The results with the Humus fertilizer additive are promising and generate good prospects for commercial adoption. However, the technological changes it entails in terms of adjusting the base fertilizer dosage and the location method require further research and validation to generate solidly supported technical recommendations.*

**ASINAGRO**  
**AGRONOMIC ADVICE AND RESEARCH**

**TEST WITH ADDITIVE FOR FERTILIZERS HUMUS - SOYBEANS**

*Third section – Thirty-Three - Uruguay*

**2024-2025 HARVEST**

*Agricultural Engineer Hernán Zorrilla*

*Agricultural Engineer Emiliano Ferreira*

## INTRODUCTION

The trial is based on a little-known topic for soybean cultivation in our country: the use of the fertilizer additive MO Humus from the Paraguayan company Tiróleo. The bioactivation of fertilizers, with additives such as MO Humus, aims to optimize their assimilation in order to reduce consumption, maximizing nutrient utilization, and minimizing losses that affect the environment and the producers' finances.

Agricultural activities today face challenges in finding ways to ensure the preservation of natural resources for future generations, minimize environmental impacts, help mitigate climate change, and produce food of proven safety and quality.

In this context, there are various strategies and visions regarding the paths to be taken. In our case, we see a priority in advancing paths that promote gradual changes in inputs, management, and processes, reducing the environmental footprint and maintaining or improving the productivity and quality of the rice produced.

The incorporation of bioinputs, such as the MO Humus additive from Tyróleo, is a key tool for generating valid alternatives to a traditional, sustainable, and highly productive management system.

In response to this challenge, for the second consecutive year, an accurate basal fertilization trial using the MO Humus additive from the company Tiróleo was installed in the third section of the Treinta y Tres department, on a farm where the rice-soybean rotation is carried out.

Starting with the NPK fertilizer dosage recommended by a technical expert based on soil analysis, two doses of OM humus were tested, both in addition to and in place of the fertilizer, and compared with a commercial control (fertilizer alone). Furthermore, all treatments were applied in duplicate, incorporated into the row or broadcast as a cover crop, to compare the effectiveness of both localization methods.

This report presents data on the test setup, materials and methods, results, statistical analysis of performance, and final comments. Illustrative photographs are also included.

## GOALS

- To evaluate the effectiveness of the fertilizer additive MO Humus in soybean cultivation.
- Contrast between online application and random coverage.
- Adjust the application of MO Humus in relation to replacement or addition with NPK fertilizer.
- Quantify its impact on crop yield.

## MATERIALS AND METHODS

**Product evaluated:** fertilizer additive MO Humus

Bioactivating additive with the same physical characteristics as a granulated fertilizer, making it suitable for mixing prior to application.

It is obtained from plant materials, subjected to the microaerophilic batch fermentation process under physicochemical and biological conditions that promote and enrich the natural microbiome of plant extracts.



Nutrient release depends on the existing microbiology in the soil, but the use of the MO Humus additive increases this dynamic because the product's natural microbiome favors the processes that make nutrients available to plants.

**Treatments:** (Dose kg/ha)

| TRT | Humus | NPK (1) | Location            | Relationship<br>Humus: NPK |
|-----|-------|---------|---------------------|----------------------------|
| 1-  | 0     | 200     | Line                | Control                    |
| 2-  | 0     | 200     | Broadcast<br>seeind | Control                    |
| 3-  | 50    | 200     | Line                | Additive                   |
| 4-  | 50    | 200     | Broadcast<br>seeind | Additive                   |
| 5-  | 50    | 150     | Line                | Replacement<br>(2)         |
| 6-  | 50    | 150     | Broadcast<br>seeind | Replacement<br>(2)         |
| 7-  | 20    | 200     | Line                | Additive                   |
| 8-  | 20    | 200     | Broadcast<br>seeind | Additive                   |
| 9-  | 20    | 150     | Line                | Replacement<br>(3)         |
| 10- | 20    | 150     | Broadcast<br>seeind | Replacement<br>(3)         |

(1) NPK base fertilizer: 0 – 20/20 – 30

(2) Complete 1:1 replacement with 25% reduction in NPK dosage

(3) Partial replacement 0.4:1 with 25% reduction in NPK dosage

## Design

Random blocks with three repetitions

Plots of 20 m<sup>2</sup> (4 m wide by 5 m long).

**Distribution of treatments:**

|    |   |   |   |    |
|----|---|---|---|----|
| 6  | 5 | 4 | 7 | 3  |
| 10 | 1 | 9 | 2 | 8  |
| 1  | 3 | 5 | 7 | 9  |
| 2  | 4 | 6 | 8 | 10 |
| 10 | 9 | 8 | 6 | 7  |
| 1  | 2 | 3 | 4 | 5  |

## Test facility

| Locality | Producer        | Planting date | Cultivate         |
|----------|-----------------|---------------|-------------------|
| Vergara  | Hernán Zorrilla | November 13   | DM Garra IPRO STS |

Representative location of the traditional rice-growing basin of Laguna Merín, the area included in the third section of the department of Treinta y Tres corresponds to the “Rincón de Ramírez” unit of the Soil Recognition Chart of Uruguay, scale 1:1,000,000, and the soil where the test was installed is an Ochric Dystric Planosol with a silty loam texture.

#### **Soil analysis -**

Predecessor: rice stubble

Management: Spring glyphosate – pre-tillage (disk and leveling)

|                       |      |
|-----------------------|------|
| pH (H <sub>2</sub> O) | 5.3  |
| MO (%)                | 1.9  |
| P – citric acid (ppm) | 8    |
| K (meq/100 gr soil)   | 0.19 |

#### **Recommended Dose**

The recommendation for phosphorus and potassium fertilization for soybeans is determined based on soil chemical analysis and the production system that alternates soybeans with rice in a 1:1 rotation.

- P<sub>2</sub>O<sub>5</sub> = 40 units / ha
- K<sub>2</sub>O = 60 units / ha

For the commercial Control NPK (0 - 20/20 - 30) it is adjusted to 200 kg/ha (treatment 1).

#### **Description of the environment**

The trial was installed in a soybean crop, planted on a Dystric Ochric Planosol with a silty loam texture belonging to the Rincón de Ramírez unit.

The planting date for the farm is mid-November, with the Don Mario genetic variety, Garra IPRO STS , a long-cycle VI crop with an indeterminate growth habit. Its main characteristics include its excellent adaptation to medium-to-low productivity environments and rice plain soils.

**Crop management:**

Sowing:

Date: 13-11-24

Sowing conditions: Good sowing preparation

Soil with low humidity

Planting type: row – seeder: John Deere planter

Variety: DM Garra IPRO STS / Sowing density: 17 seeds/m linear

Basal fertilization:

Date: 20-11-24 with the germinated culture

Dosage: according to treatments

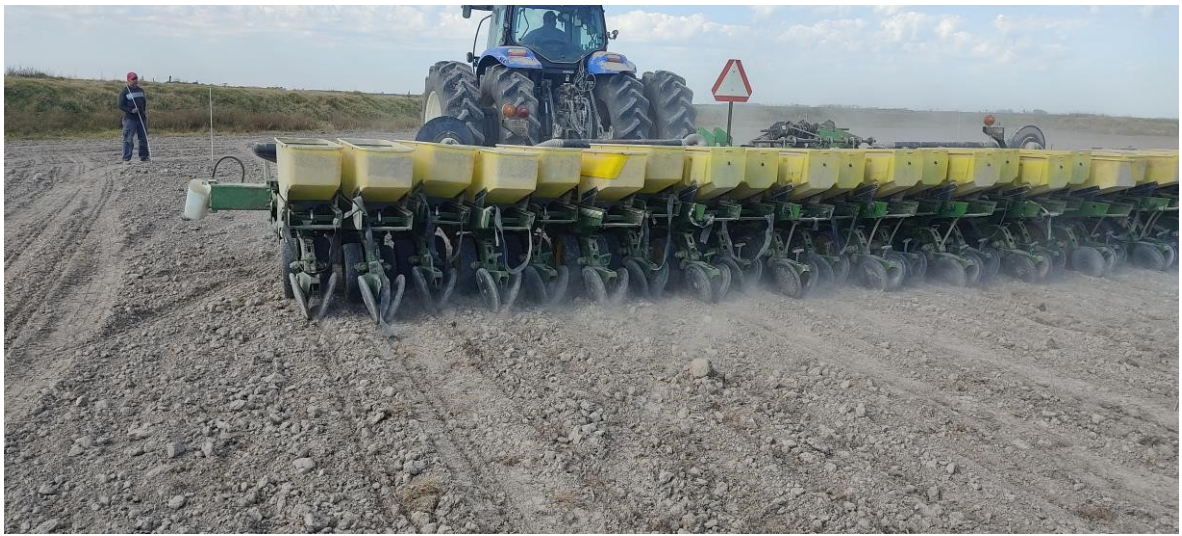

Photo 1 – Sowing the test.

**Climatic characterization of the harvest determining the yield potential**

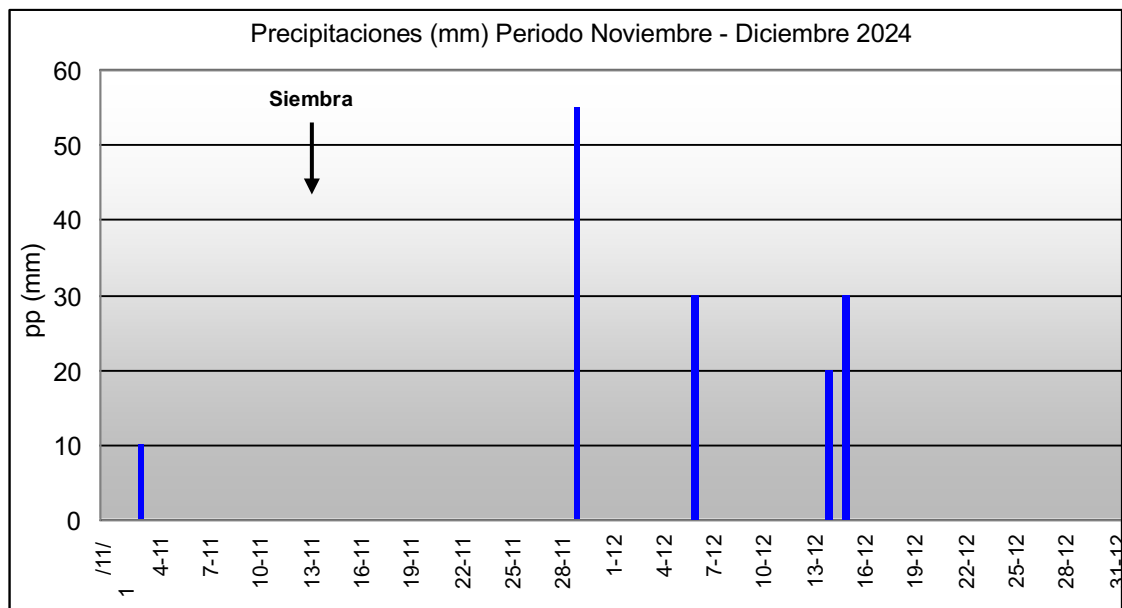

Chart I – Daily rainfall (mm) – Period November – December 2024 Source: Producer's own data.

Planting was carried out immediately after a low rainfall event, but due to the quality of the rainfall, determined by a good seeder, excellent plant recovery was achieved, achieving a population of 320,000 plants/ha.

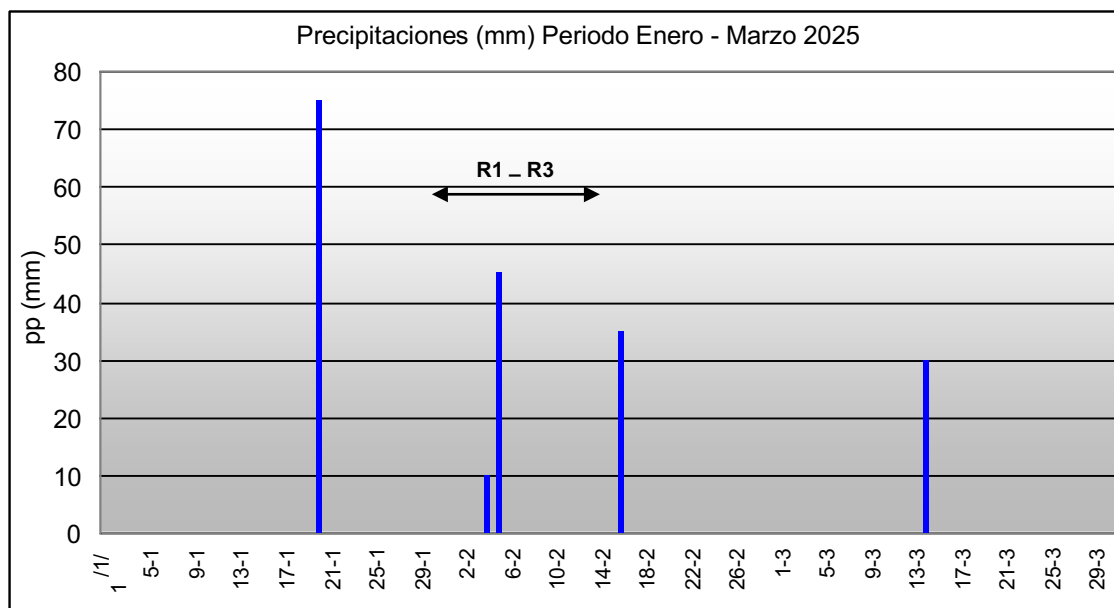

Graph II – Daily rainfall (mm) – Period January – March 2025 Source: Producer's own data.

Prior to and during the critical stage for yield generation, between R1 and R3, significant rainfall occurred that favored the generation of very good yield potential, finally materialized by timely rainfall during grain filling.

## EVALUATIONS

Plant development – 37 days after emergence –



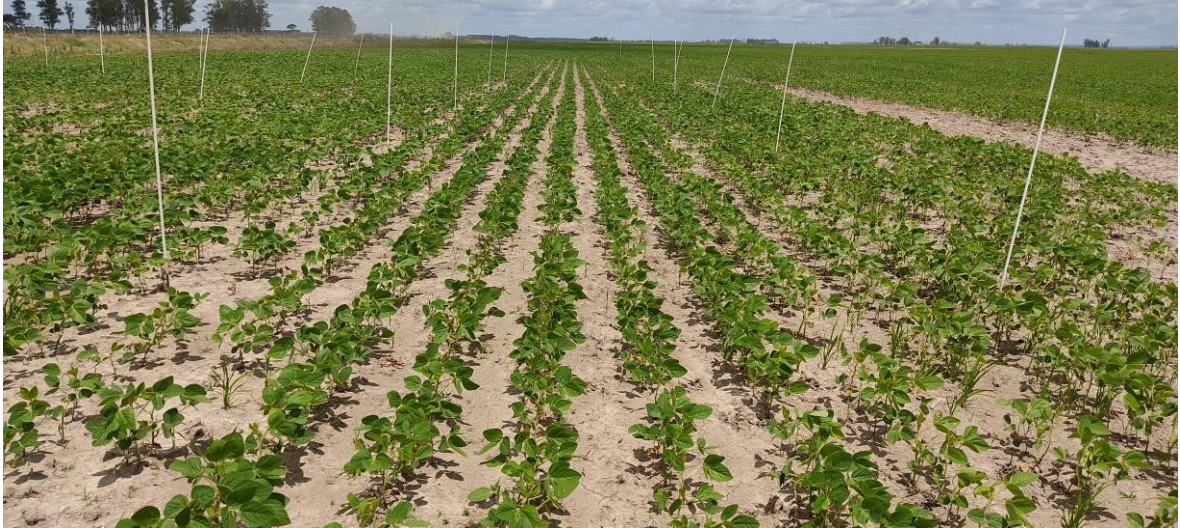

Photo 2: Treatment 7 (Humus 20 + NPK 200 located in the row) in the foreground, and Treatment 8 (same dose but applied broadcast) in the background. They showed similar plant development in the initial evaluation.

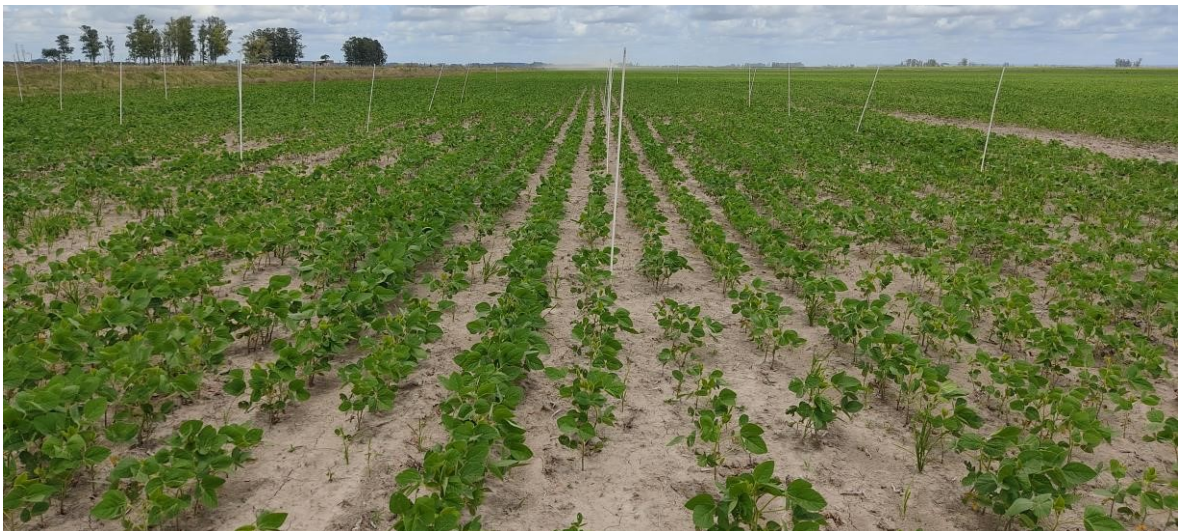

Photo 3: on the left, treatment 6 (Humus 50 + NPK 150 applied by broadcasting) and on the right, treatment 7 (20 + 200). The treatment mentioned in the previous section was observed to have greater plant development. First term, 37 days after the emergency.

Photo 4: in the foreground treatment 10 (Humus 20 + NPK 150) and in the background treatment 6 (50 + 150) both applied broadcast. They showed similar plant development 37 days later. of the emergency.



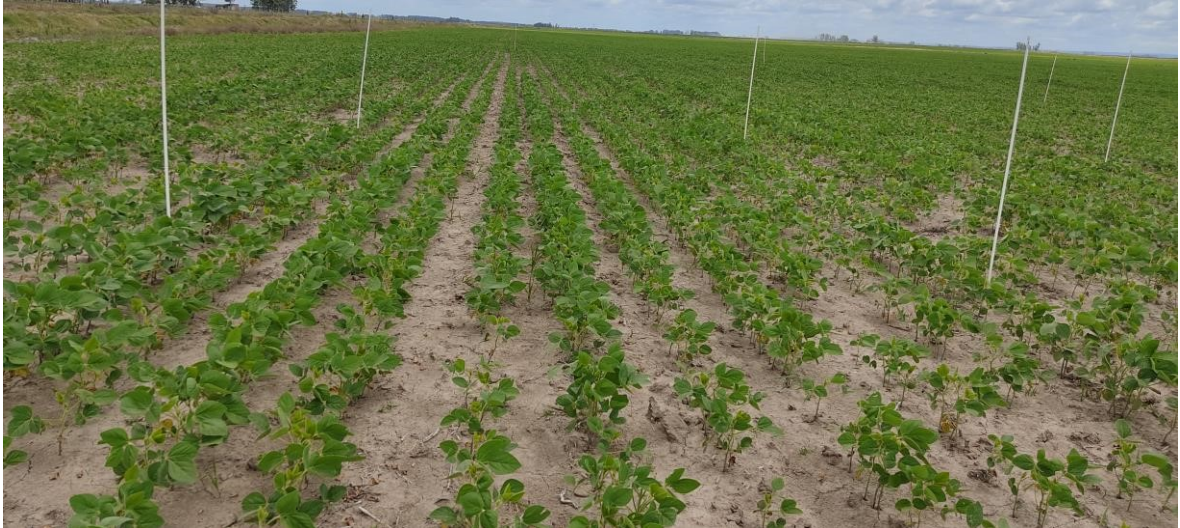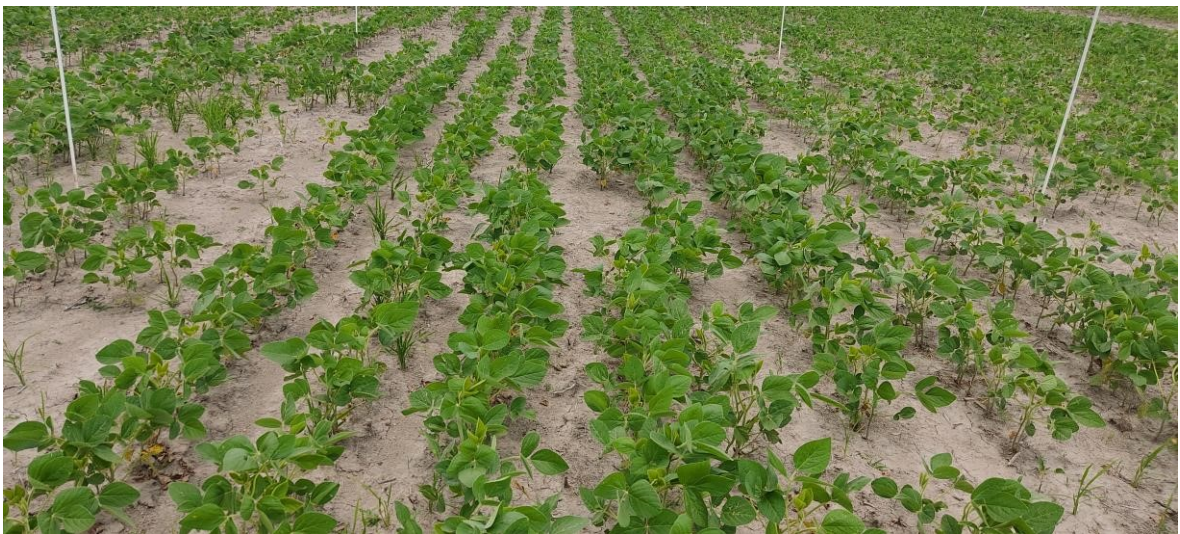

Photo 5: in the foreground treatment 10 (Humus 20 + NPK 150) and in the background the commercial control (NPK 200) both applied by broadcasting. The first mentioned showed a greater development of plants than the Control, at the time of the first evaluation.

**Plant development – 85 days after emergence –**



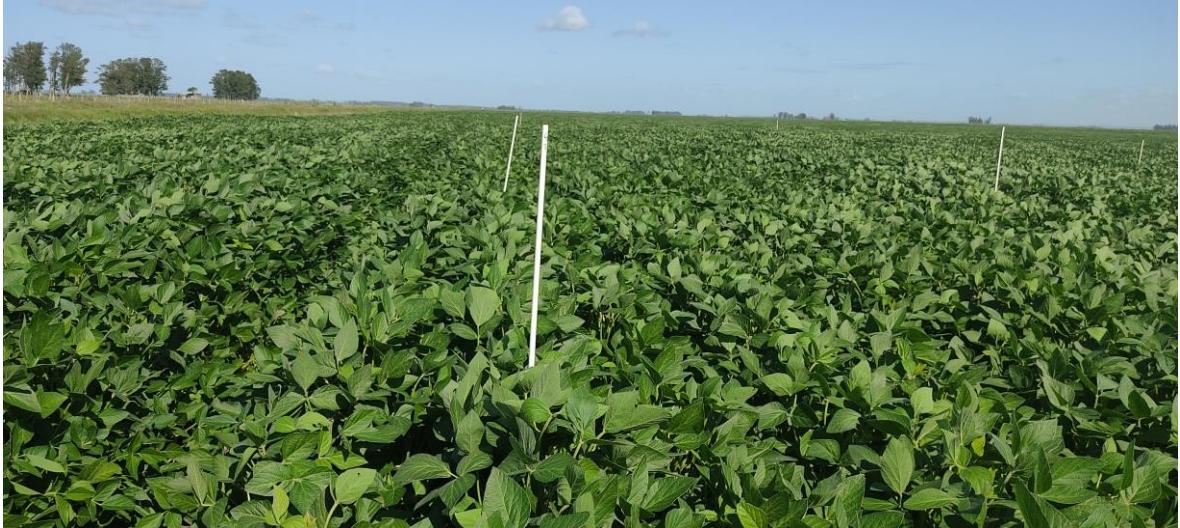

Photo 6: on the left, treatment 5 (Humus 50 + NPK 150 located on the line) and on the right treatment 4 (50 + 200 applied by broadcasting) showed similar plant development, 85 days after the emergency.

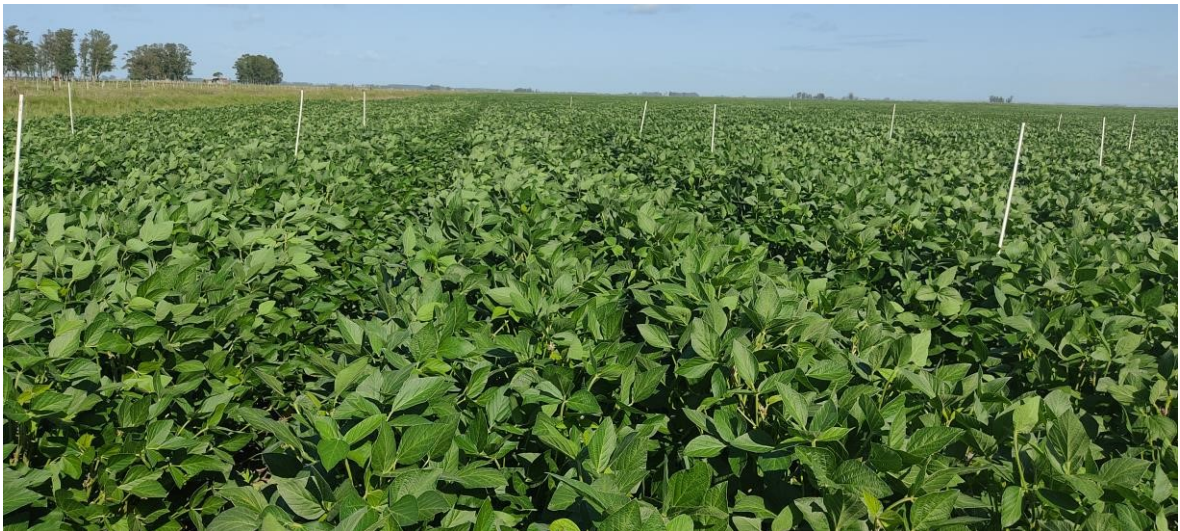

Photo 7: Treatment 3 (Humus 50 + NPK 200) in the foreground, and the commercial control (NPK 200) in the background, both located in a row. The former showed greater plant development at the time of the second evaluation.

Photo 8: Treatment 4 (Humus 50 + NPK 200 applied broadcast on the cover) in the foreground, and Treatment 3 (50 + NPK 200 applied on the row) in the background. The latter showed greater plant development 85 days after emergence.



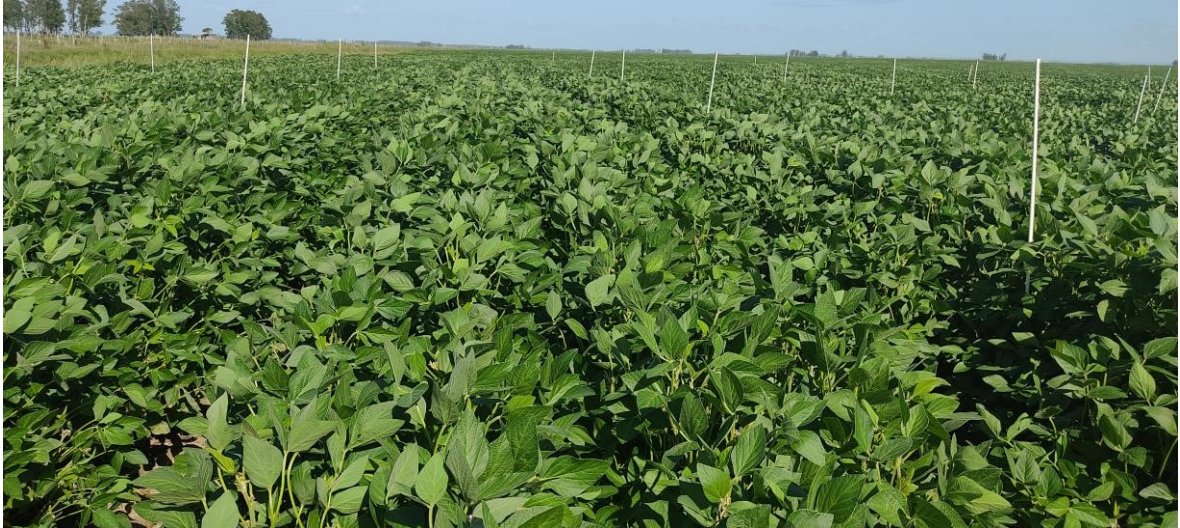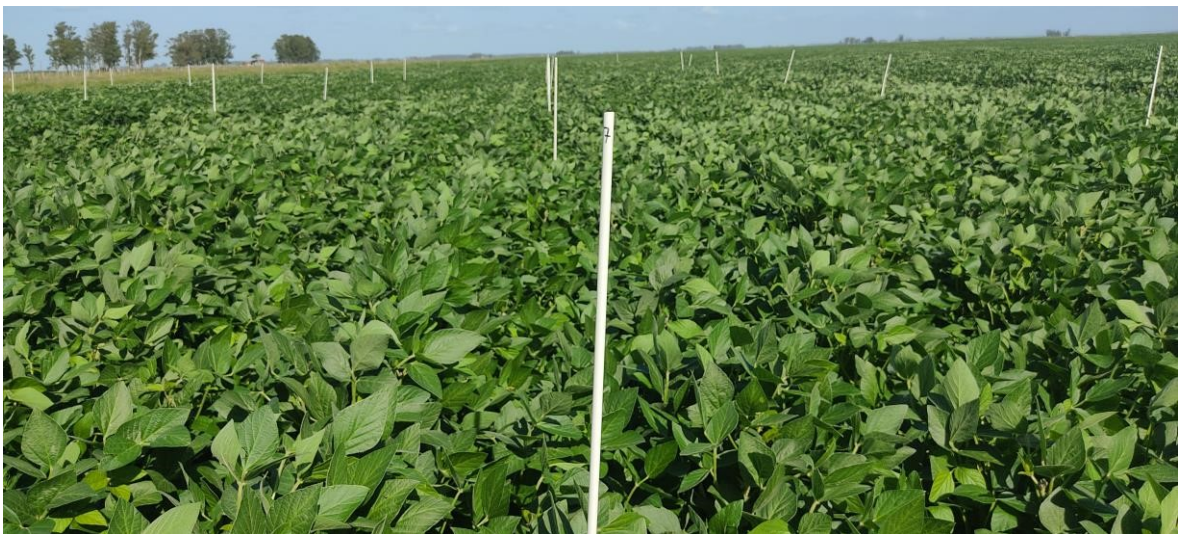

Photo 9: on the left, treatment 6 (Humus 50 + NPK 150 applied by broadcasting in coverage) On the right, treatment 7 (20 + 200 located on the line). The first one presented a noticeable greater development of plants at the time of the second evaluation.

***PERFORMANCES***  
**Kg/ha corrected to 12% humidity**

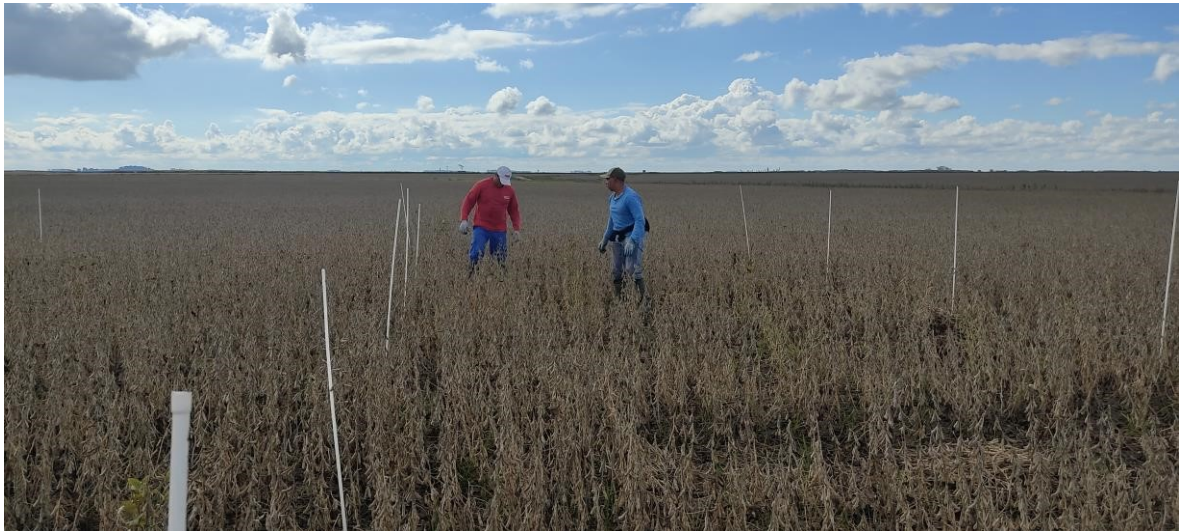

| Treatments | Yo   | II   | III  | Average |
|------------|------|------|------|---------|
| 1-         | 3450 | 3675 | 3750 | 3625    |
| 2-         | 3775 | 3525 | 3400 | 3567    |
| 3-         | 4225 | 4350 | 4125 | 4233    |
| 4-         | 3800 | 4000 | 3950 | 3917    |
| 5-         | 3575 | 3675 | 3925 | 3725    |
| 6-         | 3900 | 3825 | 4050 | 3925    |
| 7-         | 3700 | 3525 | 3450 | 3558    |
| 8-         | 4025 | 3775 | 3700 | 3833    |
| 9-         | 3875 | 3725 | 3950 | 3850    |
| 10-        | 3850 | 4125 | 4000 | 3992    |

□ Overall average of the test: 3823 kg/ha

| TRT | Humus | NPK | Location            |
|-----|-------|-----|---------------------|
| 1-  | 0     | 200 | Line                |
| 2-  | 0     | 200 | Broadcast<br>seeind |
| 3-  | 50    | 200 | Line                |
| 4-  | 50    | 200 | Broadcast<br>seeind |
| 5-  | 50    | 150 | Line                |
| 6-  | 50    | 150 | Broadcast<br>seeind |
| 7-  | 20    | 200 | Line                |
| 8-  | 20    | 200 | Broadcast<br>seeind |
| 9-  | 20    | 150 | Line                |
| 10- | 20    | 150 | Broadcast<br>seeind |

### STATISTICAL ANALYSIS

Test: Tukey; Alpha = 0.05

| FV         | gl | SC      | CM     | F      |
|------------|----|---------|--------|--------|
| Blocks     | 2  | 875     | 438    |        |
| Treatments | 9  | 1204188 | 133799 | 5.82 * |
| Mistake    | 18 | 414125  | 23007  |        |
| Total      | 29 | 1619188 |        |        |

CV: 3.97%

With an overall trial average of 3823 kg/ha, statistically significant differences were found at 5%, due to the treatments.

| Treatments | Average Yield (kg/ha) |
|------------|-----------------------|
| 3-         | 4233 to               |
| 10-        | 3992 b                |
| 6-         | 3925 b                |
| 4-         | 3917 b                |
| 9-         | 3850 bc               |
| 8-         | 3833 bc               |
| 5-         | 3725 CD               |
| 1-         | 3625 d                |
| 2-         | 3567 d                |
| 7-         | 3558 d                |

DMS = 184 kg/ha

Means with a common letter are not significantly different ( $p > 0.05$ )

| TRT | Humus | NPK | Location          |
|-----|-------|-----|-------------------|
| 1-  | 0     | 200 | Line              |
| 2-  | 0     | 200 | Broadcast<br>seed |
| 3-  | 50    | 200 | Line              |
| 4-  | 50    | 200 | Broadcast<br>seed |
| 5-  | 50    | 150 | Line              |
| 6-  | 50    | 150 | Broadcast<br>seed |
| 7-  | 20    | 200 | Line              |
| 8-  | 20    | 200 | Broadcast<br>seed |
| 9-  | 20    | 150 | Line              |
| 10- | 20    | 150 | Broadcast<br>seed |

**Average yield per treatment**



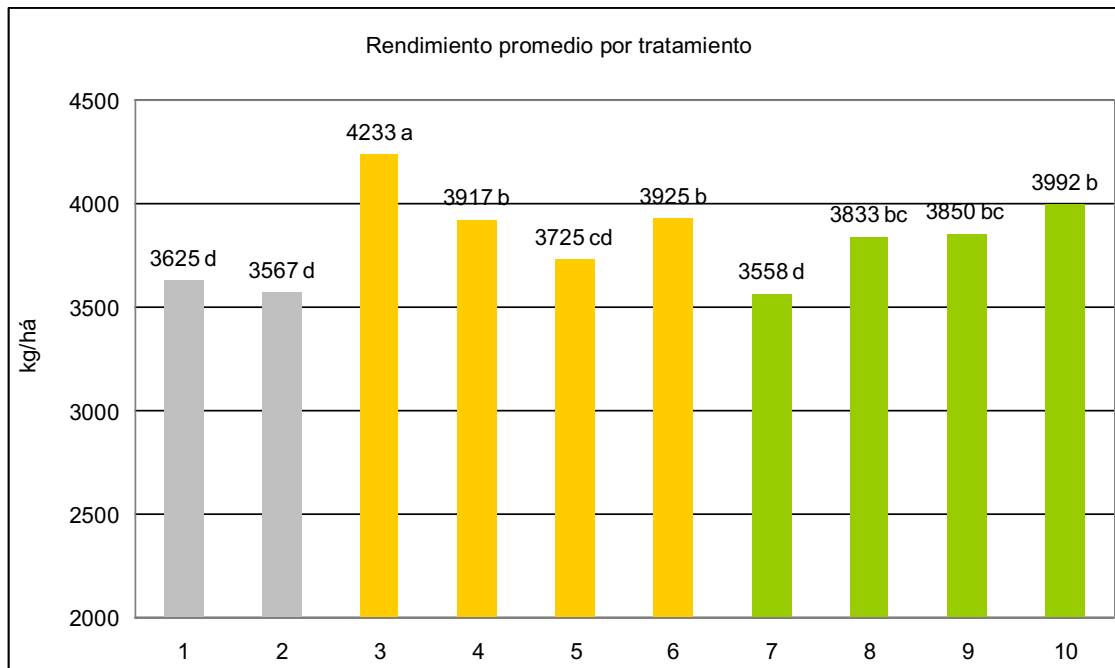

Chart No. 1 - Average yield (kg/ha) per treatment. With separation of averages.

Means with a common letter are not significantly different ( $p > 0.05$ )

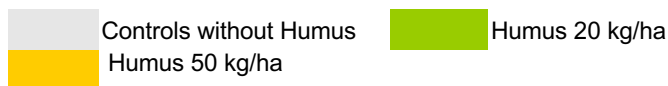

Treatment 3 (Humus 50 + NPK 200 located in the line) was positioned at the top of the yields, significantly surpassing the rest.

In a second step, a group of treatments with different combinations of MO Humus plus NPK fertilizer and both localization methods were positioned, which significantly outperformed the commercial controls.

| TRT | Humus | NPK | Location         |
|-----|-------|-----|------------------|
| 1-  | 0     | 200 | Line             |
| 2-  | 0     | 200 | Broadcast seeind |
| 3-  | 50    | 200 | Line             |
| 4-  | 50    | 200 | Broadcast seeind |
| 5-  | 50    | 150 | Line             |
| 6-  | 50    | 150 | Broadcast seeind |
| 7-  | 20    | 200 | Line             |
| 8-  | 20    | 200 | Broadcast seeind |
| 9-  | 20    | 150 | Line             |
| 10- | 20    | 150 | Broadcast seeind |

### Ordered decreasing average yield and productive response

| Treatments | Average Yield<br>(kg/ha) | Productive response<br>(%) (1) |
|------------|--------------------------|--------------------------------|
| 3-         | 4233                     | 117                            |
| 10-        | 3992                     | 110                            |
| 6-         | 3925                     | 108                            |
| 4-         | 3917                     | 108                            |
| 9-         | 3850                     | 106                            |
| 8-         | 3833                     | 106                            |
| 5-         | 3725                     | 103                            |
| 1-         | 3625                     | 100                            |
| 2-         | 3567                     | 98                             |
| 7-         | 3558                     | 98                             |

(1) Productive response on the commercial Control (treatment 1)\_ Base = 100%

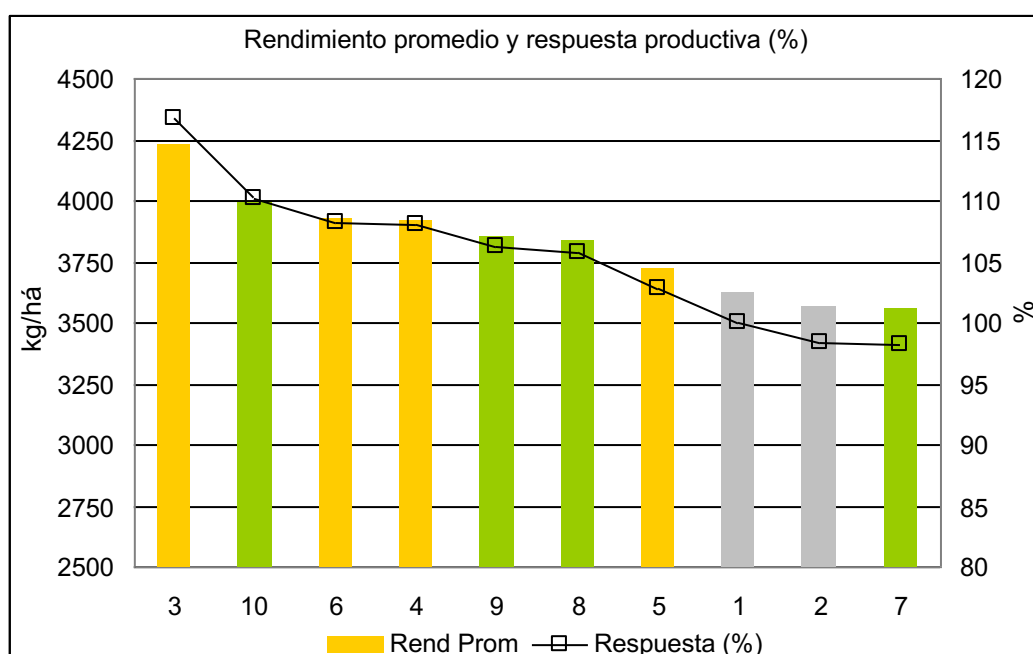

Graph No. 2 - Average yield ordered decreasing (kg/ha) and productive response (%)

Controls without Humus  
 50 kg/ha  
 Humus 20 kg/ha Humus

| TRT | Humus | NPK | Location          |
|-----|-------|-----|-------------------|
| 1-  | 0     | 200 | Line              |
| 2-  | 0     | 200 | Broadcast<br>seed |
| 3-  | 50    | 200 | Line              |
| 4-  | 50    | 200 | Broadcast<br>seed |
| 5-  | 50    | 150 | Line              |



|     |    |     |                     |
|-----|----|-----|---------------------|
| 6-  | 50 | 150 | Broadcast<br>seeind |
| 7-  | 20 | 200 | Line                |
| 8-  | 20 | 200 | Broadcast<br>seeind |
| 9-  | 20 | 150 | Line                |
| 10- | 20 | 150 | Broadcast<br>seeind |

**Average yields (kg/ha) grouped by:**

- 1- Dosage of MO Humus and NPK fertilizer**
- 2- Localization method**

| Dose (kg/ha) (1) | Line        | Broadcast<br>seeind | <i>Average</i> |
|------------------|-------------|---------------------|----------------|
| 0 + 200          | 3625        | 3567                | 3596           |
| 20 + 150         | 3850        | 3992                | 3921           |
| 50 + 150         | 3725        | 3925                | 3825           |
| 20 + 200         | 3558        | 3833                | 3696           |
| 50 + 200         | 4233        | 3917                | 4075           |
| <i>Average</i>   | <i>3798</i> | <i>3847</i>         |                |

(1): MO Humus + Fertilizer

Grouping yields by location method, the overall average for broadcast coverage showed a 1.3% increase compared to the average for treatments applied in the line.

The dose of 50 + 200 MO Humus + NPK fertilizer recorded the highest average yield, considering all the dose combinations evaluated.

Yields (kg/ha) depending on the response to doses of MO Humus + NPK fertilizer

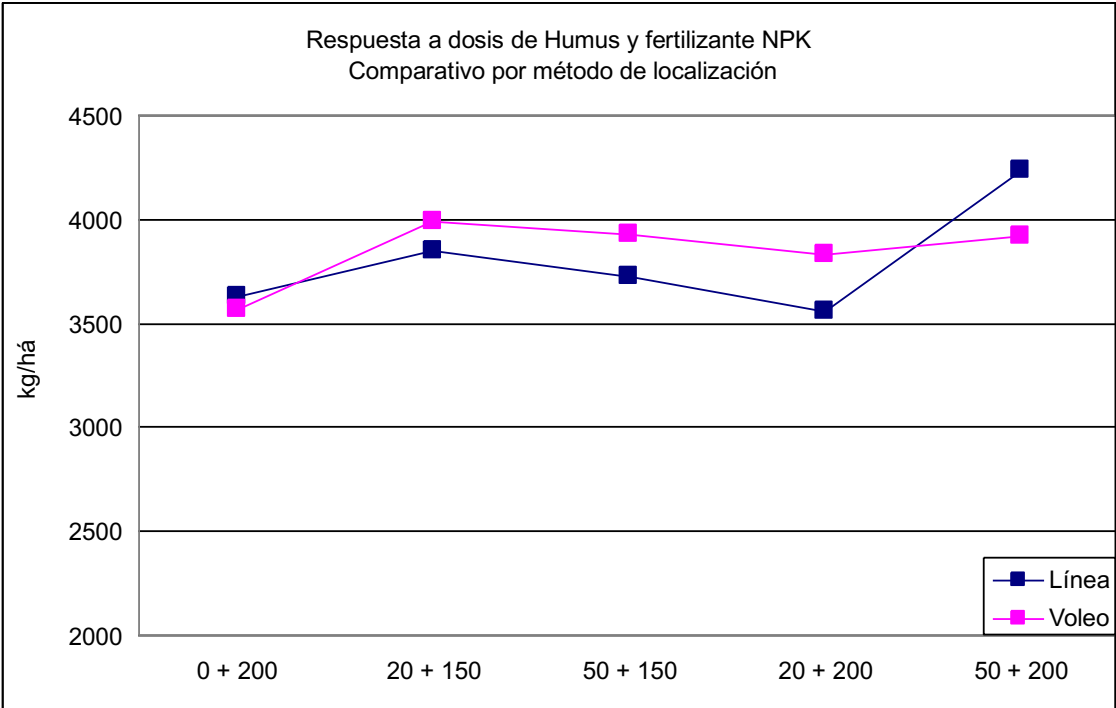

Chart 3 - Response to doses of OM humus + NPK fertilizer. Comparison of different localization methods.

Yields grouped by dose of MO Humus and NPK fertilizer

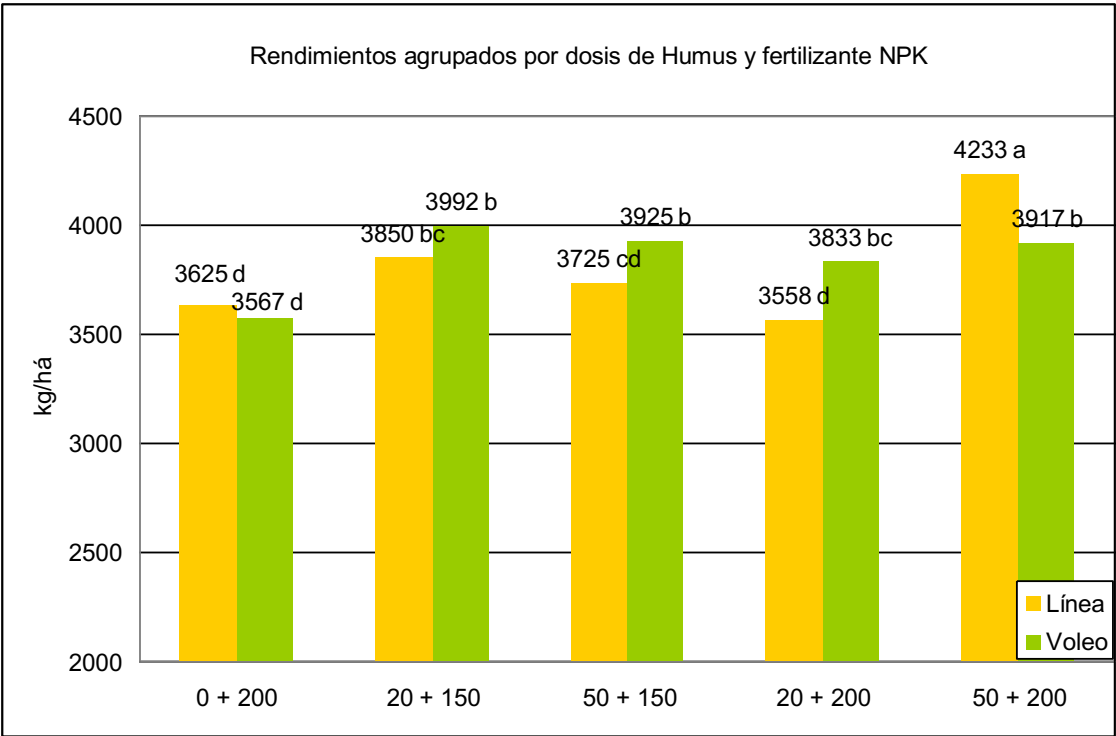

Chart 4 - Yields grouped by dose of humus and NPK fertilizer. With separation of averages.

Means with a common letter are not significantly different ( $p > 0.05$ )

- ❑ With the 50 + 150 and 20 + 200 doses of OM humus + NPK, the broadcast topdressing treatments significantly outperformed the line-based treatments. On the other hand, the 50 + 200 dose resulted in the opposite, with the line-based treatment significantly outperforming the other treatments.
- ❑ In the commercial Control and in the combination of MO Humus + NPK of 20 + 150, no statistically significant differences were found by the location method.

#### Yields grouped by location method

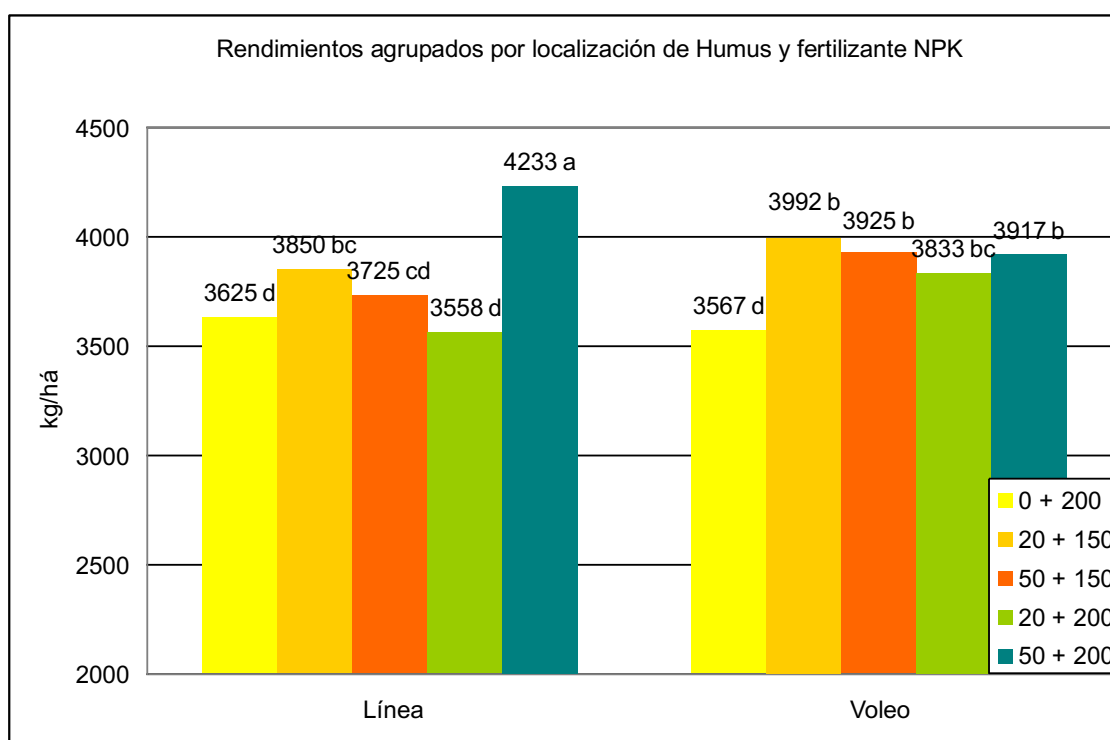

Chart 5 - Yields grouped by location method. With mean separation.

Means with a common letter are not significantly different ( $p > 0.05$ )

- ❑ When applied broadcast as a cover crop, all treatments with MO Humus + NPK fertilizer significantly outperformed the commercial control (NPK fertilizer only) and did not differ statistically from each other.
- ❑ With the application of the line, the treatment with OM Humus 50 + NPK 200 stood out, positioning itself at the top of the yields, significantly surpassing the others. In second place was the 20 + 150 treatment, which statistically outperformed the commercial control, while the remaining combinations were no different.
- ❑ In general terms, six combinations of MO Humus and NPK fertilizer achieved significant productive response over commercial controls (only NPK fertilizer), two of them were applied in line and the other four were broadcast in coverage.

Photo 10: In the foreground, the commercial control NPK 200 applied in-line, and in the background, treatment 10 (Humus 20 + NPK 150 broadcast on the surface). The latter significantly outperformed the control, achieving a 10% increase in yield over it.

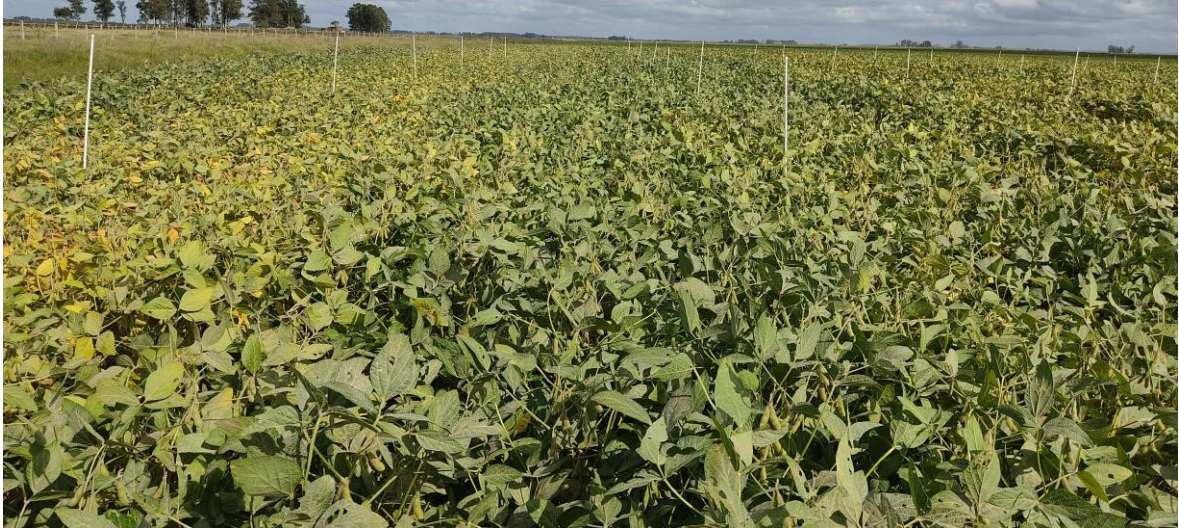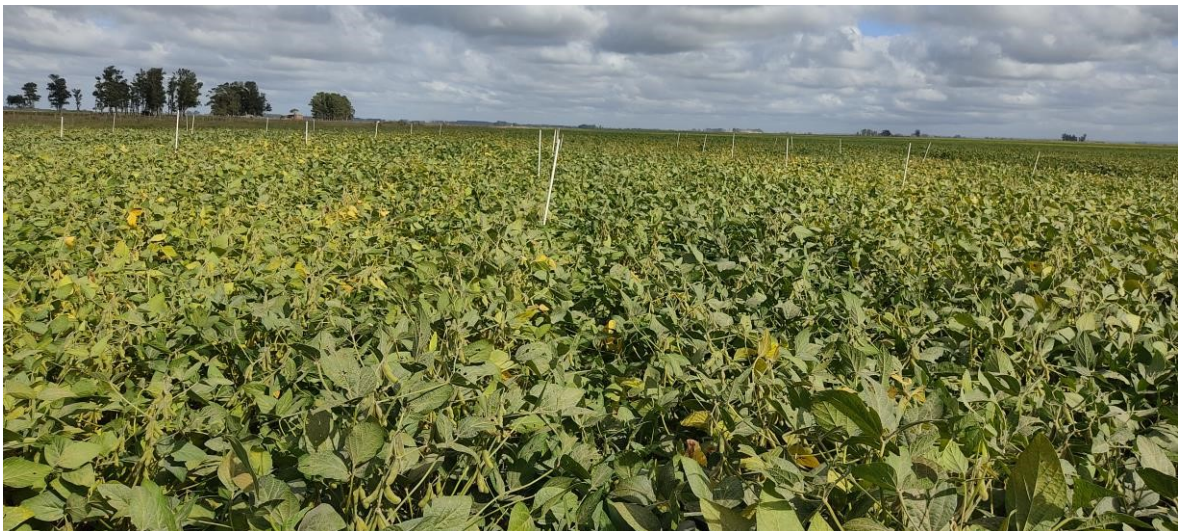

Photo 11: On the left, treatment 3 (Humus 50 + NPK 200 applied in-line), and on the right, treatment 4 (same dosage but broadcast on the surface). The former significantly outperformed the latter in the final yield obtained.



Photo 12: In the foreground, treatment 4 (Humus 50 + NPK 200) and in the background, treatment 6 (50 + 150), both broadcast on the surface. They did not differ statistically from each other in the final yield obtained.

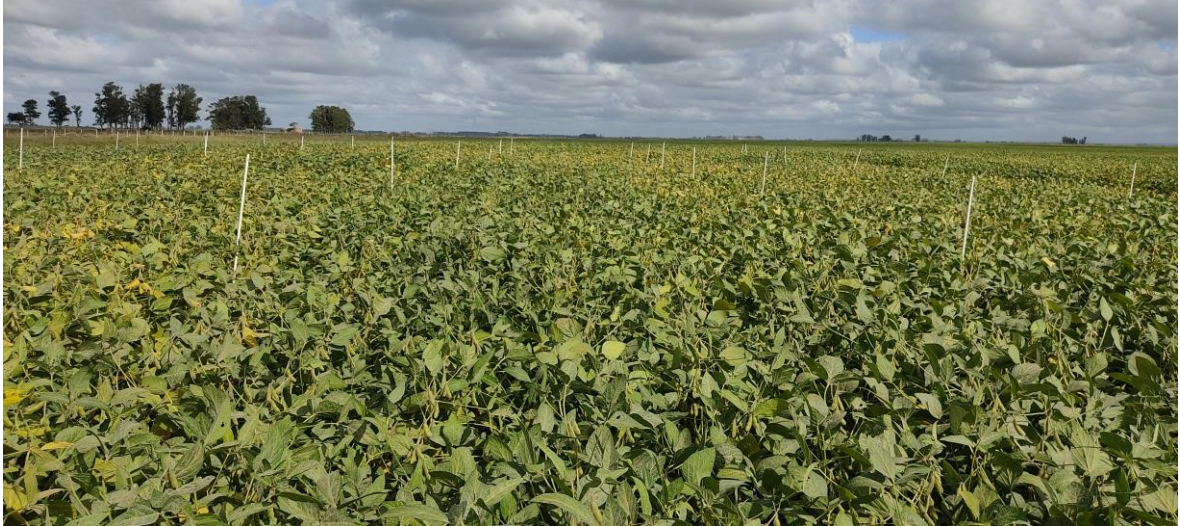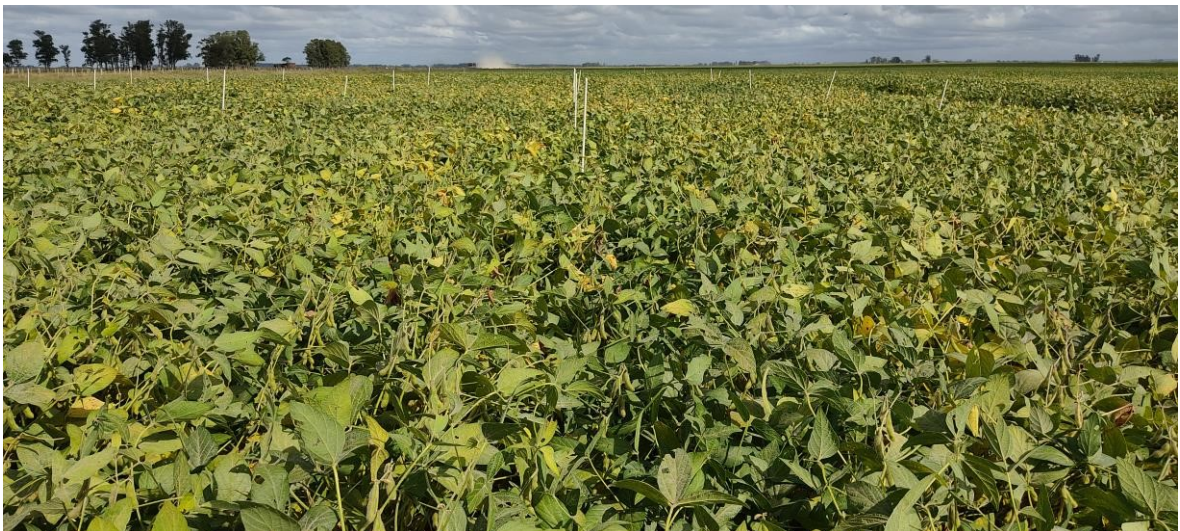

Photo 13: On the left, treatment 6 (Humus 50 + NPK 150 broadcast on the surface), and on the right, treatment 7 (20 + 200 applied in-line). The former significantly outperformed the latter.



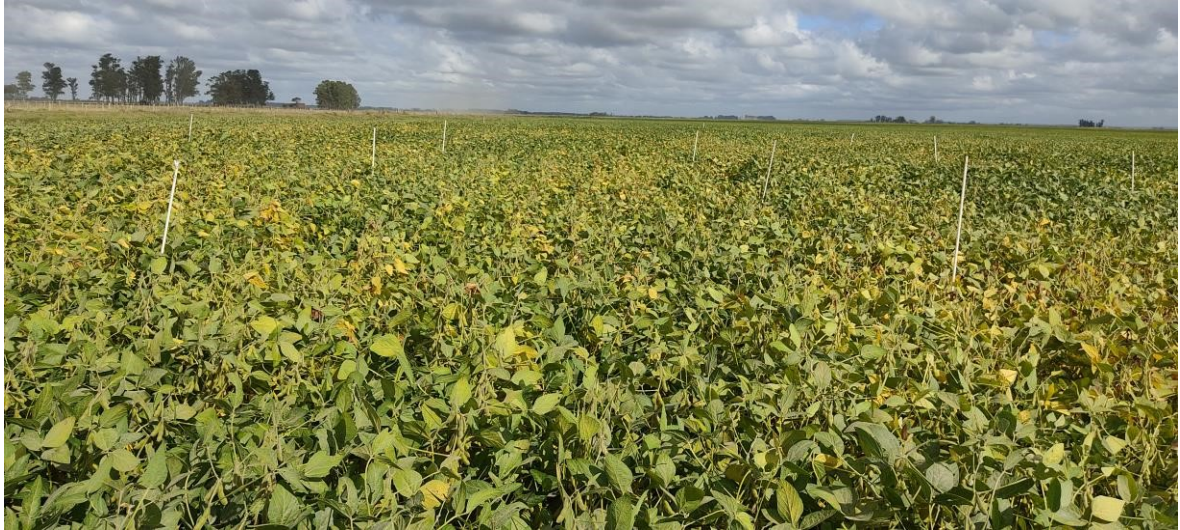

Photo 14: In the foreground, treatment 7 (Humus 20 + NPK 200 applied in the row), and in the background, the commercial control (NPK broadcast as top-dressing). They did not differ statistically from each other in the final yield obtained.

## **FINAL COMMENTS**

The essay is based on a little-known topic for soybean cultivation in our country: the use of the fertilizer additive MO Humus from the Paraguayan company Tiróleo.

Starting with the NPK fertilizer dosage recommended by a technical expert based on soil analysis, two doses of OM humus were tested, both in addition to and in place of the fertilizer, and compared with a commercial control (fertilizer alone). Furthermore, all treatments were applied in duplicate, incorporated into the row or broadcast as a cover crop, to compare the effectiveness of both localization methods.

The trial was installed in a commercial field of the DM Garra IPRO STS variety, which reached a population of 320,000 plants/ha and was located in the Third Section of the Treinta y Tres department, on Ochric Distric Planosols soils with a silty loam texture, belonging to the Rincón de Ramírez unit.

## **CONCLUSIONS**

### **Performance**

With an overall trial average of 3823 kg/ha, statistically significant differences were found at 5%, due to the treatments.

Treatment 3 (Humus 50 + NPK 200 located in the line) was positioned at the top of the yields, significantly surpassing the rest (see graph No. 1).

This superior performance treatment achieved a productive response of 17% over the commercial control (only NPK fertilizer located in the line) (see graph No. 2).

In a second performance tier, a group of treatments with different combinations of OM Humus plus NPK fertilizer and with both localization methods were positioned, which significantly outperformed the commercial controls.

Grouping yields by location method, the overall average for broadcast topdressing showed a 1.3% increase compared to the average for all treatments applied in the line. Furthermore, the 50 + 200 OM humus + NPK fertilizer dose recorded the highest average yield among all dose combinations tested.

Observing the different productive responses by grouping treatments by additive and fertilizer dose allows us to compare the effectiveness achieved based on the application method. The most eloquent results were recorded with the OM Humus + NPK doses of 50 + 150 and 20 + 200, where the broadcast topdressing treatments significantly outperformed the row-based spotting treatments. On the other hand, the opposite result was found with the 50 + 200 dose.

In the commercial Control and in the combination of MO Humus + NPK of 20 + 150, no statistically significant differences were found by the location method (see graph No. 4).

Grouping the results by the location method (see graph No. 5) allows us to highlight other relevant conclusions drawn from this essay.

When applied broadcast as a cover crop, all treatments with MO Humus + NPK fertilizer significantly outperformed the commercial control (NPK fertilizer only) and did not differ statistically from each other.

With the application of the line, the treatment with OM Humus 50 + NPK 200 stood out, positioning itself at the top of the yields, significantly surpassing the others. In second place was the 20 + 150 treatment, which statistically outperformed the commercial control, while the remaining combinations were no different.

In general terms, six combinations of MO Humus and NPK fertilizer achieved significant productive response over commercial controls (only NPK fertilizer), two of them were applied in line and the other four were broadcast in coverage. The responses were variable, but in three cases the highest production was achieved by adding MO Humus to the NPK fertilizer and in the remaining three by replacing part of the dose of NPK fertilizer with the bioactivator.

*The results with the fertilizer additive MO Humus are encouraging, as significant yield responses were found with its use in soybean crops. However, the most effective combination to maximize this response could not be determined, as several options were highlighted. However, the variable location method is providing certainty that both in-line application and broadcast coverage would not generate differences in the expected response.*

**ASINAGRO**  
**AGRONOMIC ADVICE AND RESEARCH**

**TEST WITH ADDITIVE FOR FERTILIZERS HUMUS - RICE**

*Seventh section – Thirty-Three - Uruguay*

**2024-2025 HARVEST**

*Agricultural Engineer Hernán Zorrilla*

*Agricultural Engineer Emiliano Ferreira*

## INTRODUCTION

The trial is based on a little-known topic for rice cultivation in our country: the use of the fertilizer additive MO Humus from the Paraguayan company Tiróleo . The bioactivation of fertilizers, with additives such as MO Humus, aims to optimize their assimilation in order to reduce consumption, maximizing nutrient utilization, and minimizing losses that affect the environment and the producers' economies.

Agricultural activities today face challenges in finding ways to ensure the preservation of natural resources for future generations, minimize environmental impacts, help mitigate climate change, and produce food of proven safety and quality.

In this context, there are various strategies and visions regarding the paths to be taken. In our case, we see a priority in advancing paths that promote gradual changes in inputs, management, and processes, reducing the environmental footprint and maintaining or improving the productivity and quality of the rice produced.

The incorporation of bioinputs , such as the MO Humus additive from Tyróleo , is a key tool for generating valid alternatives to a traditional sustainable and highly productive management system.

Responding to this challenge, an exact basal fertilization trial was installed in the seventh section of the department of Treinta y Tres for the second consecutive year, using the MO Humus additive from the company Tiróleo , on a farm with a long history of cultivation.

Starting with the NPK fertilizer dosage recommended by a technical expert based on soil analysis, two doses of OM humus were tested, both in addition to and in place of the fertilizer, and compared with a commercial control (fertilizer alone). Furthermore, all treatments were applied in duplicate, incorporated into the row or broadcast as a cover crop, to compare the effectiveness of both localization methods.

This report presents data on the test setup, materials and methods, results, statistical analysis of performance, and final comments. Illustrative photographs are also included.

## GOALS

- To evaluate the effectiveness of the fertilizer additive MO Humus in rice cultivation.
- Contrast between online application and random coverage.
- Adjust the application of MO Humus in relation to replacement or addition with NPK fertilizer.
- Quantify its impact on crop yield.

## MATERIALS AND METHODS

**Product evaluated:** MO Humus fertilizer additive

Bioactivating additive with the same physical characteristics as a granulated fertilizer, making it suitable for mixing prior to application.

It is obtained from plant materials, subjected to the batch fermentation process. microaerophilic under physicochemical and biological conditions that promote and enrich the natural microbiome of plant extracts.

Nutrient release depends on the existing microbiology in the soil, but the use of the MO Humus additive increases this dynamic because the product's natural microbiome favors the processes that make nutrients available to plants.



**Treatments:** (Dose kg/ha)

| TRT | Humus | NPK (1) | Location            | Relationship<br>Humus: NPK |
|-----|-------|---------|---------------------|----------------------------|
| 1-  | 0     | 150     | Line                | Control                    |
| 2-  | 0     | 150     | Broadcast<br>seeind | Control                    |
| 3-  | 50    | 150     | Line                | Additive                   |
| 4-  | 50    | 150     | Broadcast<br>seeind | Additive                   |
| 5-  | 50    | 100     | Line                | Replacement<br>(2)         |
| 6-  | 50    | 100     | Broadcast<br>seeind | Replacement<br>(2)         |
| 7-  | 20    | 150     | Line                | Additive                   |
| 8-  | 20    | 150     | Broadcast<br>seeind | Additive                   |
| 9-  | 20    | 100     | Line                | Replacement<br>(3)         |
| 10- | 20    | 100     | Broadcast<br>seeind | Replacement<br>(3)         |

(1) NPK base fertilizer: 0 – 20/20 – 30

(2) Complete 1:1 replacement with a 33% reduction in NPK dosage

(3) Partial replacement 0.4:1 with 33% reduction in NPK dosage

**Design**

Random blocks with three repetitions  
Plots of 20 m<sup>2</sup> (4 m wide by 5 m long).

**Distribution of treatments:**

|   |   |    |    |   |   |
|---|---|----|----|---|---|
|   |   | 6  | 5  | 7 |   |
|   |   | 3  | 8  | 4 |   |
| 9 | 2 | 1  | 10 | 9 | 7 |
| 6 | 8 | 10 | 1  | 3 | 5 |
| 4 | 2 | 10 | 9  | 8 | 7 |
| 1 | 2 | 3  | 4  | 5 | 6 |

**Test facility**

| Locality        | Producer        | Planting date | Cultivate |
|-----------------|-----------------|---------------|-----------|
| Seventh section | Gustavo Ferrari | October 20    | CL 19231  |

Representative location of the traditional rice-growing basin of Laguna Merín. The area comprised in the seventh section of the department of Treinta y Tres corresponds to the La Charqueada unit

of the Soil Recognition Chart of Uruguay, scale 1:1,000,000, and the dominant soil where the trial was carried out is a Planosol. Subeutric Ocher with a silty loam texture .

### Soil analysis -

Predecessor: legume meadow

Management: Spring glyphosate – pre-tillage (disk and leveling)

|                        |      |
|------------------------|------|
| pH (H <sub>2</sub> O)  | 5.4  |
| P – citric acid (ppm)  | 7    |
| P – Bray I (ppm)       | 3    |
| Zn – DTPA (ppm)        | 0.8  |
| Ca ( meq /100 gr soil) | 6.4  |
| Mg ( meq /100 gr soil) | 3.1  |
| K ( meq /100 gr soil)  | 0.25 |
| Na ( meq /100 gr soil) | 0.4  |
| Mg/K ratio             | 12.4 |

### Recommended Dose

The recommendation for fertilizing rice with phosphorus and potassium is determined by the information contained in INIA Technical Sheet No. 46, based on chemical analysis of the soil.

For phosphorus adjustment, soil analysis data was used (range between 5 - 7 ppm), in a medium soil (30 - 50% clay) and two fertilization strategies were considered: 1) taking the "sufficiency" criterion, which consists of adding nutrients up to a critical level, above which the probability of finding a yield response is low and 2) the replacement criterion, which involves replacing part of the quantities that the grain extracts from the system above the sufficiency level, with the aim that the nutrient content in the soil remains around the critical level.

For the potassium adjustment, the soil analysis data was considered (> 0.20 meq /100 gr soil) with ammonium acetate extraction, with a Mg / K ratio (< 15) and taking both fertilization strategies.

According to the tables, the fertilization recommendation would be:

By criterion of "sufficiency".

- P<sub>2</sub>O<sub>5</sub> = 14 units / ha
- K<sub>2</sub>O = 0 units / ha

By "replacement" criterion.

- P<sub>2</sub>O<sub>5</sub> = 45 units / ha
- K<sub>2</sub>O = 20 units / ha

The commercial control NPK (0 - 20/20 - 30) was adjusted to 150 kg/ ha (treatment 1), correcting the nutrients considering the replacement, since it is the management most adopted by the producer who owns the establishment.

### Description of the environment

The trial was installed in a rice crop, planted on a Planosol Subeutric Ochric with a silty loam texture , belonging to the La Charqueada unit.

The sowing date of the farm corresponds to the end of October with the INIA CL 19231 cultivar with high yield potential, intermediate-short cycle and resistant to *Pyricularia oryzae* . This is a promising material with good potential for area expansion due to its outstanding attributes, such as productivity, cycle, grain quality, and the possibility of use in fields with weed problems, due to its tolerance to imidazolinones .

**Crop management:**

Sowing:

Date: 20-10-24

Sowing conditions: Good sowing preparation

Soil with good humidity

Type of sowing: line – seeder: Stara – Model: Guapa Supra pneumatic Cultivar: CL 19231 /

Planting density: 130 kg/ ha

Basal fertilization:

Date: 10/29/2024; crop emerged

Dosage: according to treatments

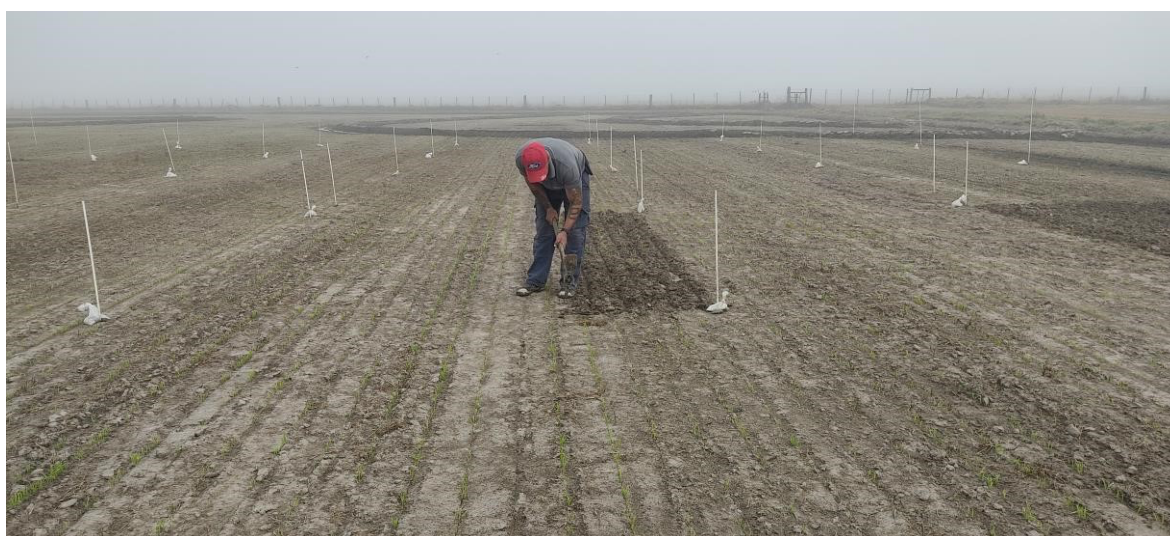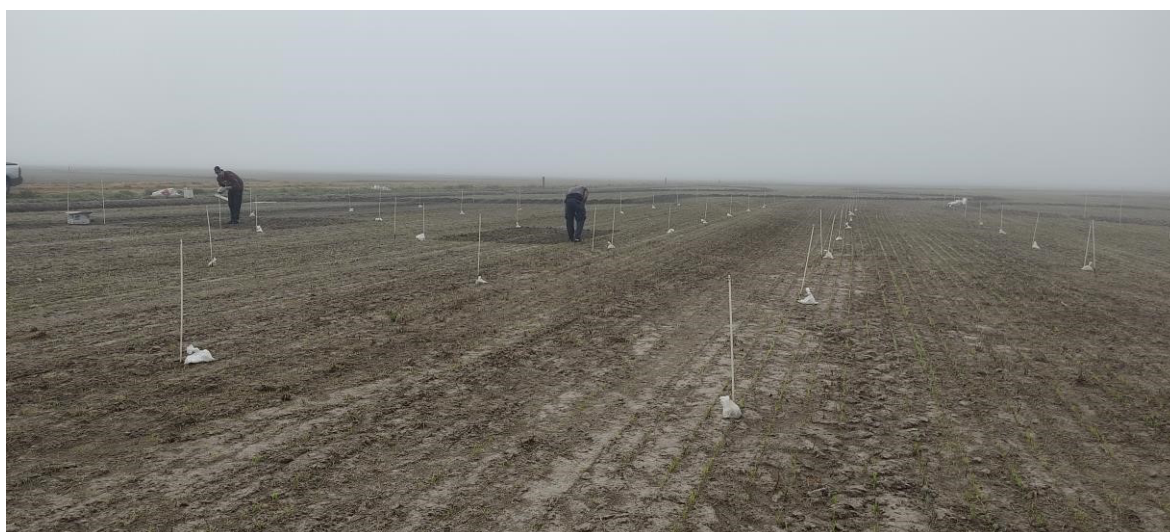

Photos 1 and 2 – State of the test at the time of installation, marking the lines for the manual fertilization in the furrow.

15 - 11 - 2024: first coverage with urea (46-0/0-0): 150 kg/ ha at the beginning of tillering

20 - 11 - 2024: start of permanent flooding  
12 - 12 - 2024: second coverage with urea (46-0/0-0): 50 kg/ha at primordium

Climatic characterization of the harvest determining the yield potential

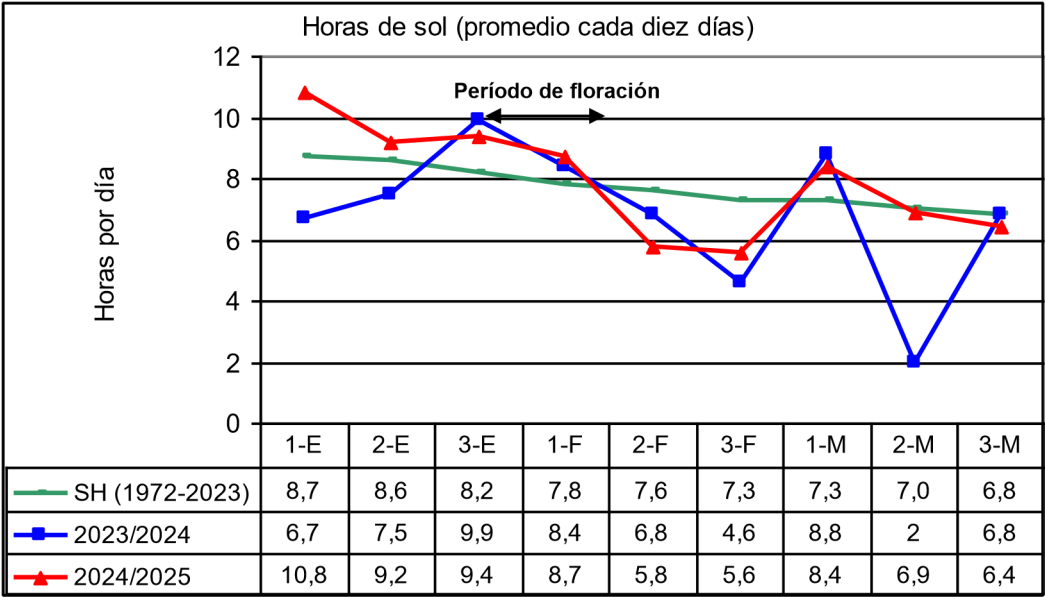

Chart I – Average sunshine hours per decade

Source: Agroclimatology Bulletin – Inia Treinta y Tres Laguna Pass Station

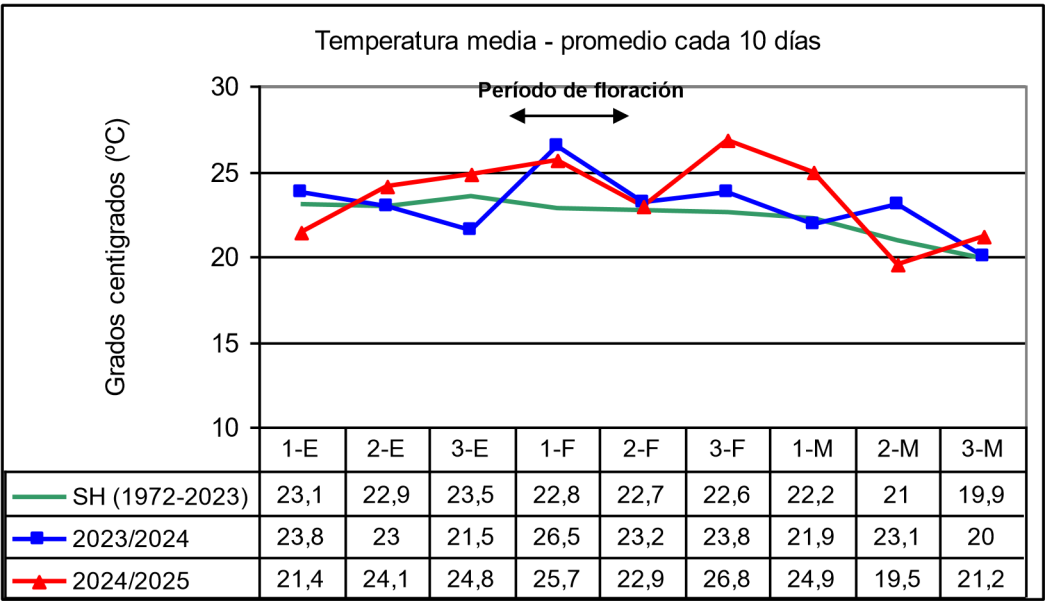

Graph II – Average temperature per decade

Source: Agroclimatology Bulletin – Inia Treinta y Tres Laguna Pass Station

This harvest showed a luminosity 2.8 % higher than the historical series and 1.5 % above the previous one, in the critical period defined by Stansel , J (1975), which covers the 21 days before and 21 days after flowering, where the hours of sunshine have the greatest impact on yields. On the other hand, the average temperature was higher than the historical series practically throughout the entire reproductive stage, which is the most sensitive time to determine grain sterility due to the incidence of low

temperatures. This factor is identified as one of the main causes that explain the instability of yields in the eastern part of our country.

For the October planting season farms, climatic factors had higher records than the historical series and the previous harvest, mainly in incident radiation, so exceptionally high yields could be expected, in response to the technological management used by the producer.

### **PERFORMANCES**

Kg/ ha corrected to 13% humidity

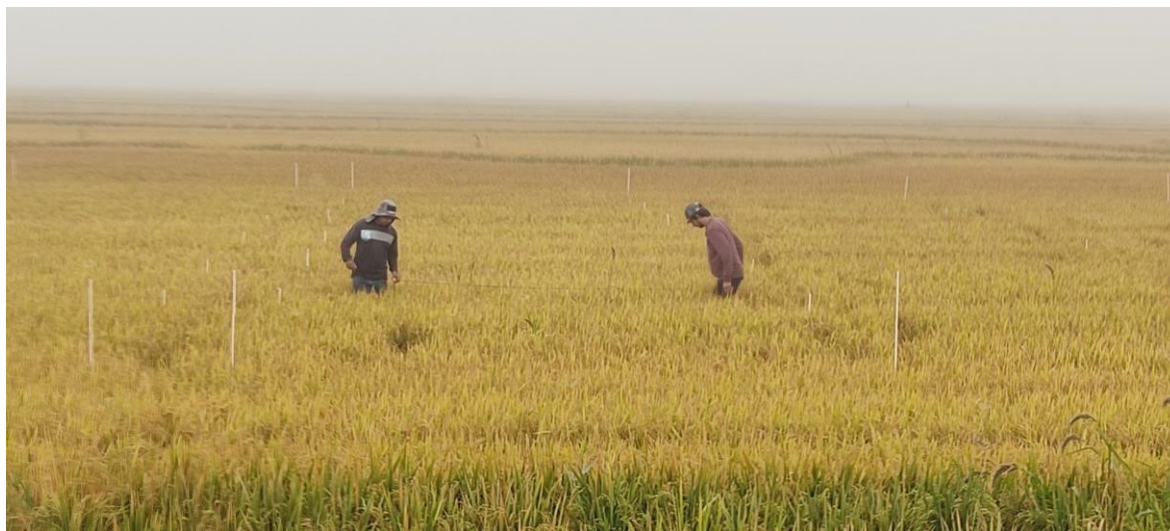

| Treatments | Yo    | II    | III   | Average |
|------------|-------|-------|-------|---------|
| 1-         | 11821 | 11690 | 12215 | 11908   |
| 2-         | 11952 | 12302 | 12872 | 12375   |
| 3-         | 12697 | 12828 | 12259 | 12594   |
| 4-         | 12609 | 12259 | 11777 | 12215   |
| 5-         | 13791 | 13572 | 13003 | 13455   |
| 6-         | 13703 | 13003 | 13922 | 13543   |
| 7-         | 13835 | 13309 | 13528 | 13558   |
| 8-         | 13703 | 13134 | 13485 | 13441   |
| 9-         | 11646 | 13178 | 12390 | 12405   |
| 10-        | 13003 | 12346 | 12697 | 12682   |

- Overall average of the test: 12818 kg/ ha (256 dry bags/ ha )

| TRT | Humus | NPK | Location          |
|-----|-------|-----|-------------------|
| 1-  | 0     | 150 | Line              |
| 2-  | 0     | 150 | Broadcast<br>seed |
| 3-  | 50    | 150 | Line              |
| 4-  | 50    | 150 | Broadcast<br>seed |
| 5-  | 50    | 100 | Line              |
| 6-  | 50    | 100 | Broadcast<br>seed |



|     |    |     |                   |
|-----|----|-----|-------------------|
| 7-  | 20 | 150 | Line              |
| 8-  | 20 | 150 | Broadcast<br>seed |
| 9-  | 20 | 100 | Line              |
| 10- | 20 | 100 | Broadcast<br>seed |

### STATISTICAL ANALYSIS

Test: Tukey, Alpha = 0.05

| FV         | gl | SC       | CM      | F      |
|------------|----|----------|---------|--------|
| Blocks     | 2  | 64915    | 32458   |        |
| Treatments | 9  | 10478484 | 1164276 | 5.94 * |
| Mistake    | 18 | 3528416  | 196023  |        |
| Total      | 29 | 14071816 |         |        |

CV: 3.45%

With a general average of the test of 12818 kg/ ha , statistically significant differences were found at 5%, due to the treatments.

| Treatments | Average Yield (kg/ ha ) |
|------------|-------------------------|
| 7-         | 13558 to                |
| 6-         | 13543 to                |
| 5-         | 13455 to                |
| 8-         | 13441 to                |
| 10-        | 12682 b                 |
| 3-         | 12594 b                 |
| 9-         | 12405 bc                |
| 2-         | 12375 bc                |
| 4-         | 12215 bc                |
| 1-         | 11908 c                 |

DMS = 537 kg/ ha

Means with a common letter are not significantly different (p > 0.05)

| TRT | Humus | NPK | Location          |
|-----|-------|-----|-------------------|
| 1-  | 0     | 150 | Line              |
| 2-  | 0     | 150 | Broadcast<br>seed |
| 3-  | 50    | 150 | Line              |
| 4-  | 50    | 150 | Broadcast<br>seed |
| 5-  | 50    | 100 | Line              |
| 6-  | 50    | 100 | Broadcast<br>seed |

|     |    |     |                   |
|-----|----|-----|-------------------|
| 7-  | 20 | 150 | Line              |
| 8-  | 20 | 150 | Broadcast<br>seed |
| 9-  | 20 | 100 | Line              |
| 10- | 20 | 100 | Broadcast<br>seed |

### Average yield per treatment

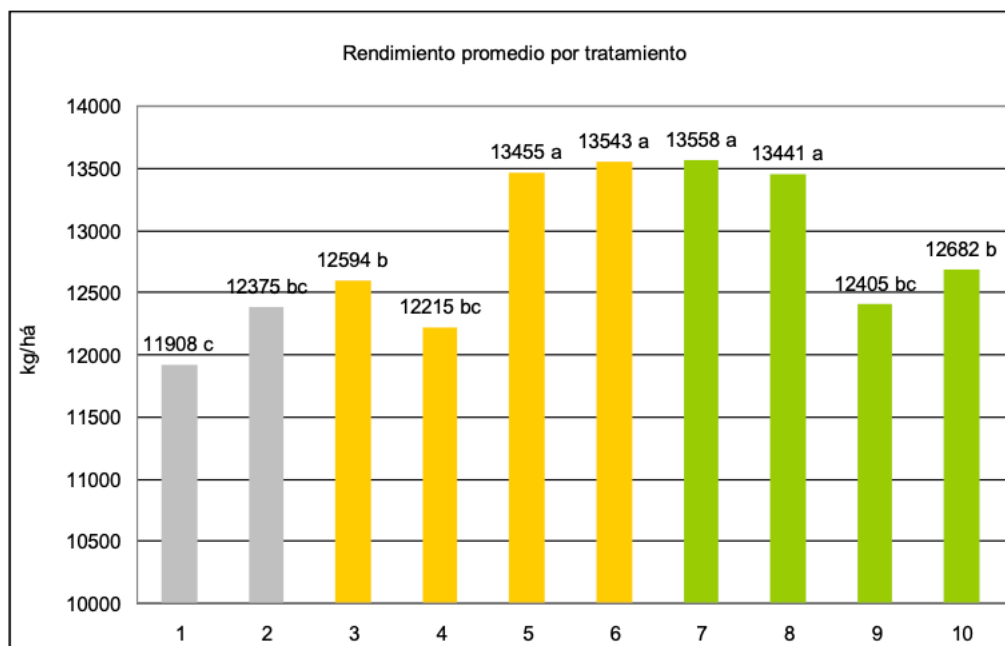

Gráfica N° 1 - Rendimiento promedio (kg/há) por tratamiento. Con separación de medias.

Means with a common letter are not significantly different ( $p > 0.05$ )

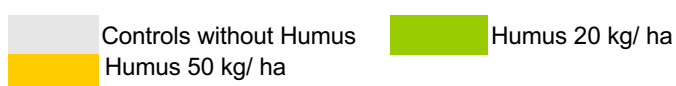

| TRT | Humus | NPK | Location          |
|-----|-------|-----|-------------------|
| 1-  | 0     | 150 | Line              |
| 2-  | 0     | 150 | Broadcast<br>seed |
| 3-  | 50    | 150 | Line              |
| 4-  | 50    | 150 | Broadcast<br>seed |
| 5-  | 50    | 100 | Line              |
| 6-  | 50    | 100 | Broadcast<br>seed |
| 7-  | 20    | 150 | Line              |
| 8-  | 20    | 150 | Broadcast<br>seed |
| 9-  | 20    | 100 | Line              |
| 10- | 20    | 100 | Broadcast<br>seed |

### Ordered decreasing average yield and productive response

| Treatments | Rend Average ( kg/ ha ) | Rend Prom ( bls / ha ) (1) | Productive response ( % ) (2) |
|------------|-------------------------|----------------------------|-------------------------------|
| 7-         | 13558                   | 271                        | 114                           |
| 6-         | 13543                   | 271                        | 114                           |
| 5-         | 13455                   | 269                        | 113                           |
| 8-         | 13441                   | 269                        | 113                           |
| 10-        | 12682                   | 254                        | 106                           |
| 3-         | 12594                   | 252                        | 106                           |
| 9-         | 12405                   | 248                        | 104                           |
| 2-         | 12375                   | 248                        | 104                           |
| 4-         | 12215                   | 244                        | 103                           |
| 1-         | 11908                   | 238                        | 100                           |

(1) Average yield: in dry bags of 50 kg/ ha

(2) Productive response on the commercial control (treatment 1)\_ Base = 100%

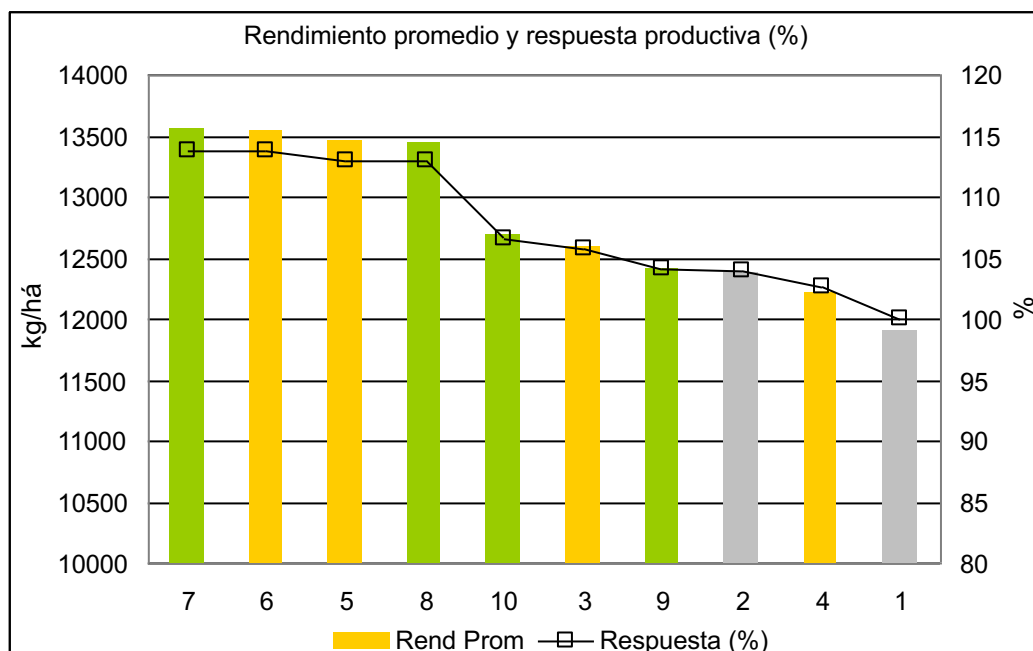

Graph No. 2 - Average yield ordered decreasing (kg/ ha ) and productive response (%)

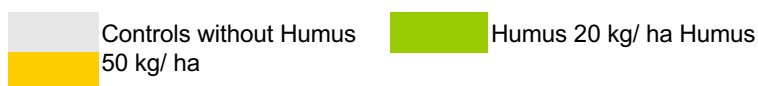

| TRT | Humus | NPK | Location         |
|-----|-------|-----|------------------|
| 1-  | 0     | 150 | Line             |
| 2-  | 0     | 150 | Broadcast seeind |
| 3-  | 50    | 150 | Line             |
| 4-  | 50    | 150 | Broadcast seeind |
| 5-  | 50    | 100 | Line             |
| 6-  | 50    | 100 | Broadcast seeind |
| 7-  | 20    | 150 | Line             |

|     |    |     |                   |
|-----|----|-----|-------------------|
| 8-  | 20 | 150 | Broadcast<br>seed |
| 9-  | 20 | 100 | Line              |
| 10- | 20 | 100 | Broadcast<br>seed |

Average yields (kg/ ha ) grouped by:

**1- Dose of MO Humus and NPK fertilizer 2- Location method**

| Dose (kg/ ha ) (1) | Line  | Broadcast<br>seed | Average |
|--------------------|-------|-------------------|---------|
| 0 + 150            | 11908 | 12375             | 12142   |
| 20 + 100           | 12405 | 12682             | 12543   |
| 50 + 100           | 13455 | 13543             | 13499   |
| 20 + 150           | 13558 | 13441             | 13499   |
| 50 + 150           | 12594 | 12215             | 12405   |
| Average            | 12784 | 12851             |         |

(1): Humus + Fertilizer

Grouping the yields according to the location method, no differences were found between the two in the overall average.

The doses of 50 + 100 and 20 + 150, of Humus + NPK fertilizer, recorded the highest average yield, considering all the dose combinations evaluated.

**Yields (kg/ha) depending on the response to doses of Humus + NPK fertilizer**

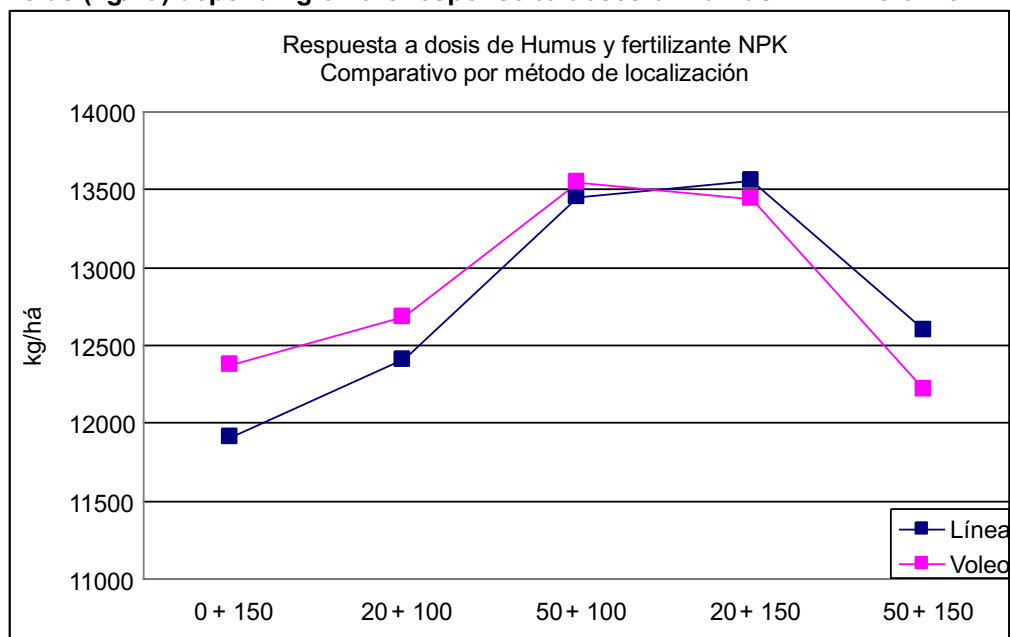

Chart 3 - Response to doses of humus + NPK fertilizer. Comparison of different localization methods.

### Yields grouped by dose of MO Humus and NPK fertilizer

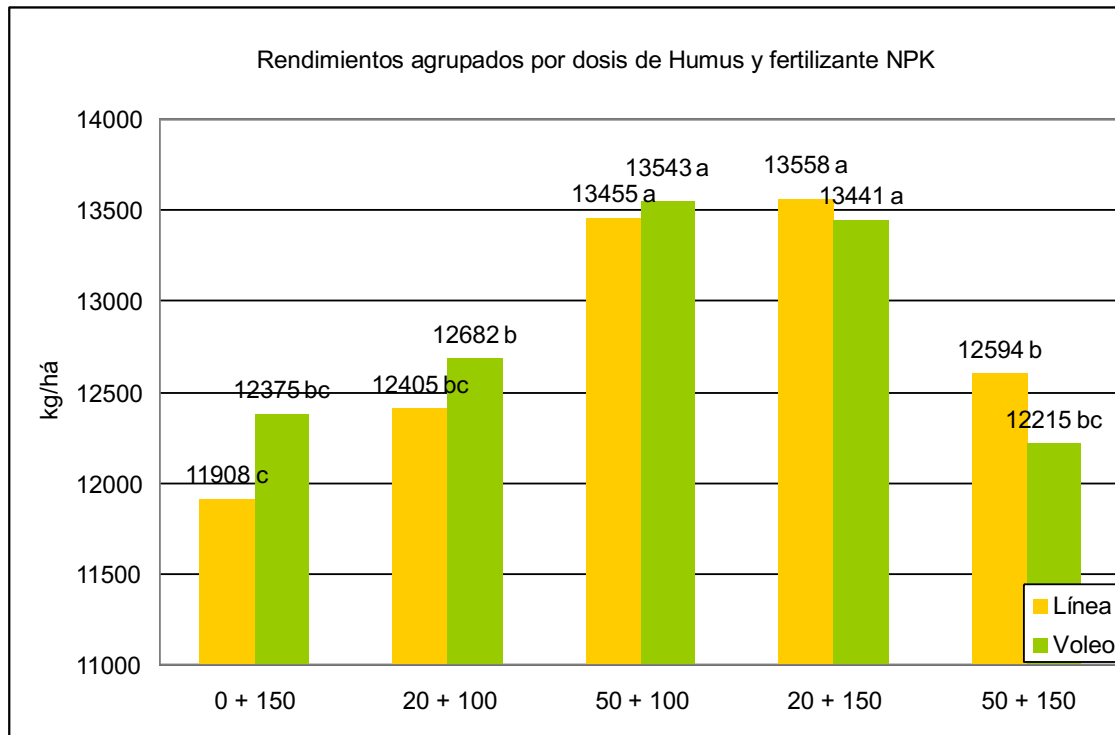

Chart 4 - Yields grouped by dose of humus and NPK fertilizer. With separation of averages.

Means with a common letter are not significantly different ( $p > 0.05$ )

- ❑ In none of the dose combinations of MO Humus and NPK fertilizer were statistically significant differences found by the location method.
- ❑ With the highest dose of MO Humus and NPK, a trend of higher performance was observed for the treatment applied in the line compared to broadcasting, on the contrary, with the lowest dose of both and with fertilization only with NPK, the trend was favorable to broadcast application in coverage.



### Yields grouped by location method

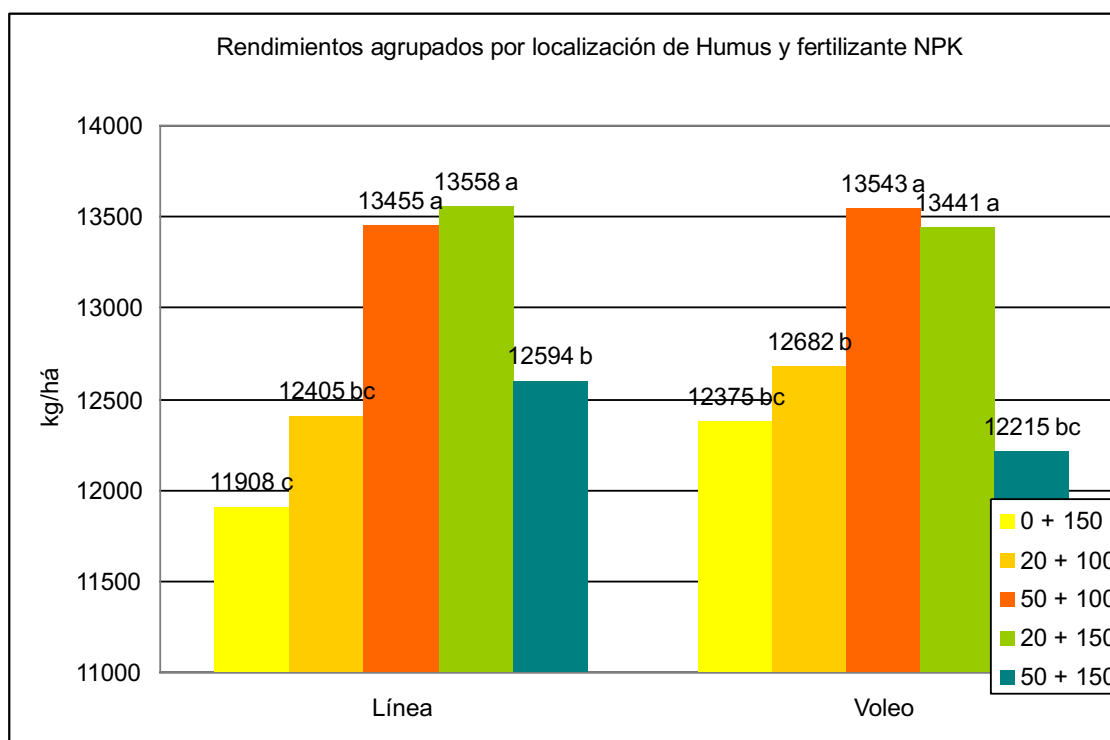

Chart 5 - Yields grouped by location method. With mean separation.

Means with a common letter are not significantly different ( $p > 0.05$ )

- ❑ By applying MO Humus and NPK fertilizer in the line, all treatments with the bioactivator significantly outperformed the commercial control (only NPK fertilizer), with the exception of the combination with the lowest dose of both, from which it did not differ statistically.
- ❑ With this application method, the combinations of 50 + 100 and 20 + 150 of MO Humus and NPK fertilizer respectively stood out, which were positioned in a first step of performance.
- ❑ When applying OM humus and NPK fertilizer broadcast as a top dressing, only the 50 + 100 and 20 + 150 combinations significantly outperformed the commercial control (NPK fertilizer only). The remaining combinations did not differ statistically from the control.
- ❑ In general terms, two of the combinations of MO Humus and NPK fertilizer achieved significant productive response over the best commercial control (only NPK fertilizer broadcast), with no differences due to the location method.
- ❑ The responses were variable, in one case the addition of MO Humus replacing 1:1 the dose of NPK fertilizer caused a significant increase in yield and in the other the response was achieved by adding the lowest dose of the bioactivator to the dose of the NPK control.
- ❑ In summary, the addition of MO Humus achieved the best performance at a higher dose as a substitute for NPK and at a lower dose as a fertilizer additive.

Photo 3: The commercial controls can be seen, with NPK 150 applied in the row on the left and broadcast on the right. They did not differ statistically from each other, but the broadcast treatment tended to show a higher yield than the one applied in the row.

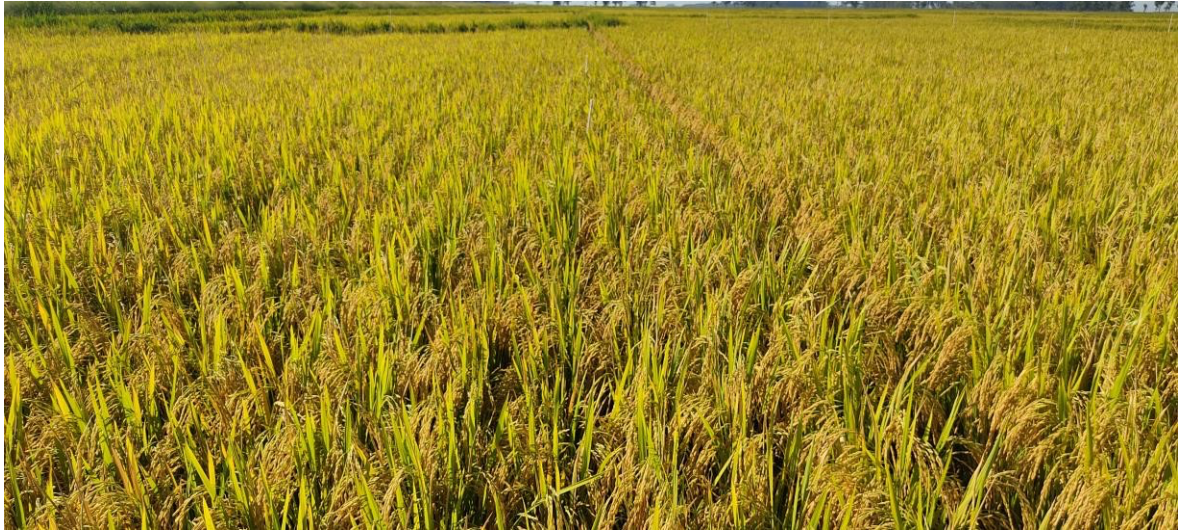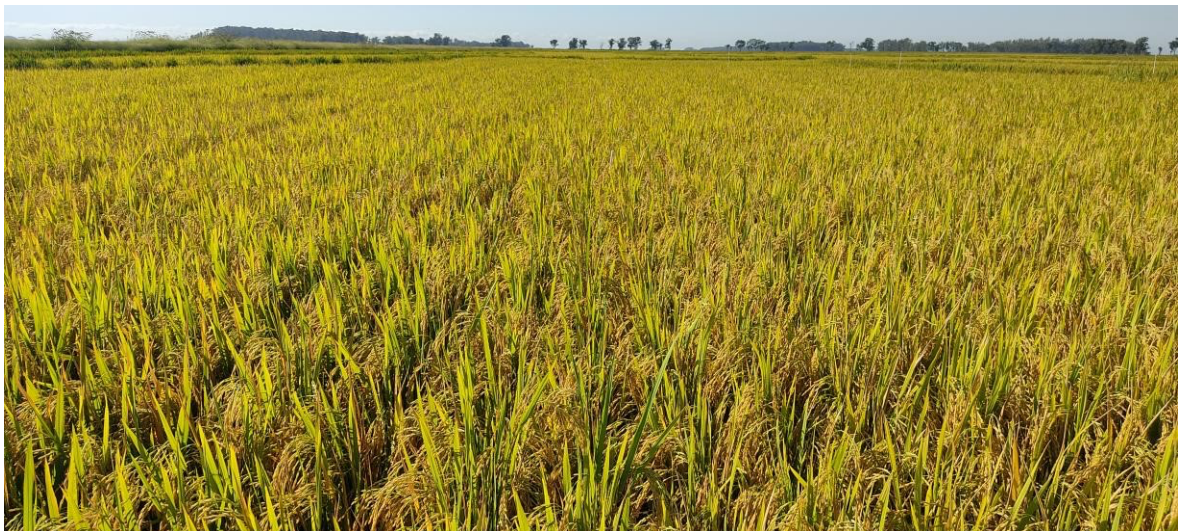

Photo 4: Treatments with Humus 50 + NPK 150, applied in the row on the left and broadcast on the right. They did not differ statistically from each other, but the treatment applied in the row tended to show a higher yield than the one broadcast.



Photo 5: Treatments with Humus 50 + NPK 100, applied in the row on the left and broadcast on the right. They did not differ statistically from each other but ranked among the highest-yielding treatments in the trial.

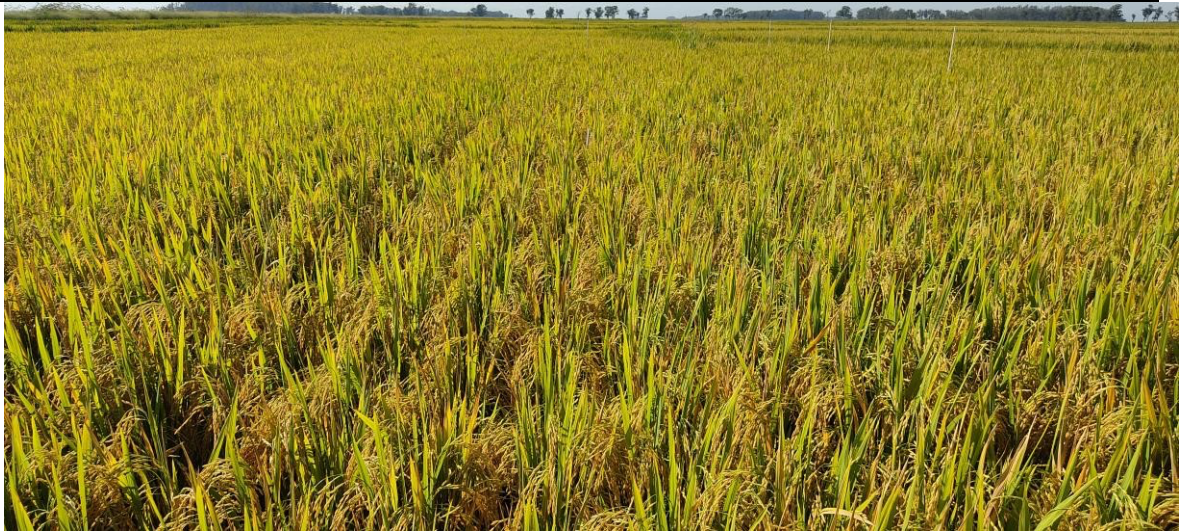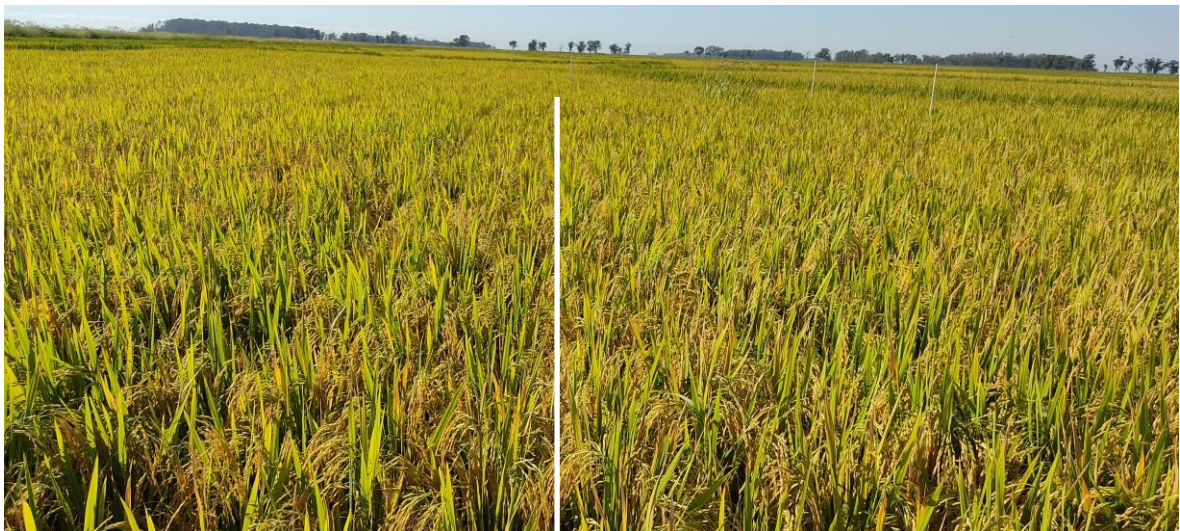

6 Photo 6: Treatments with Humus 20 + NPK 150, broadcast on the left and applied in the row on the right. They did not differ statistically from each other but ranked among the highest-yielding treatments in the trial.



Photo 7: Treatments with Humus 20 + NPK 100, broadcast on the left and applied in the row on the right. They did not differ statistically from each other, but the broadcast treatment tended to show a higher yield than the one applied in the row.

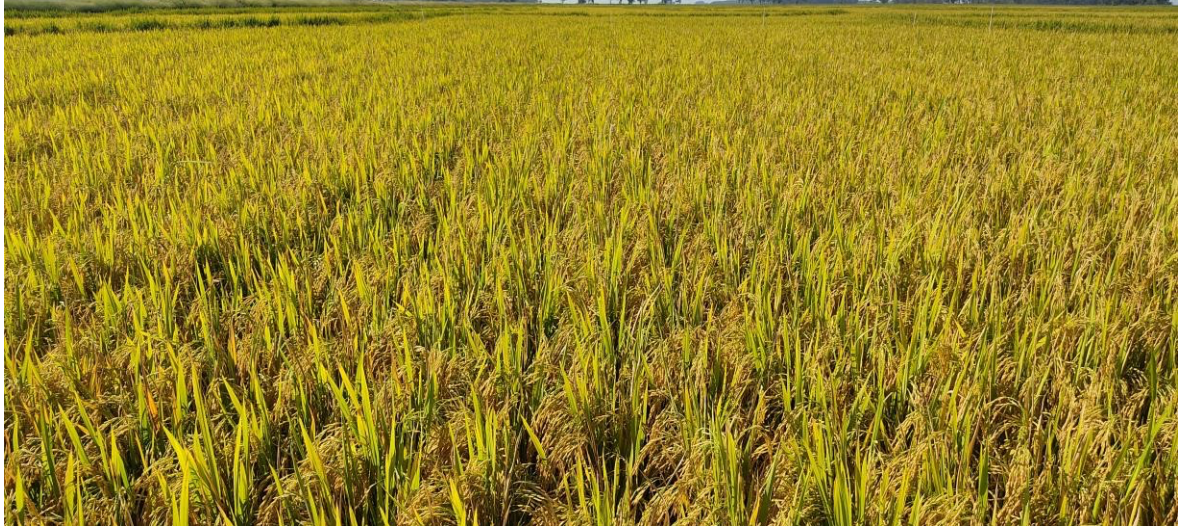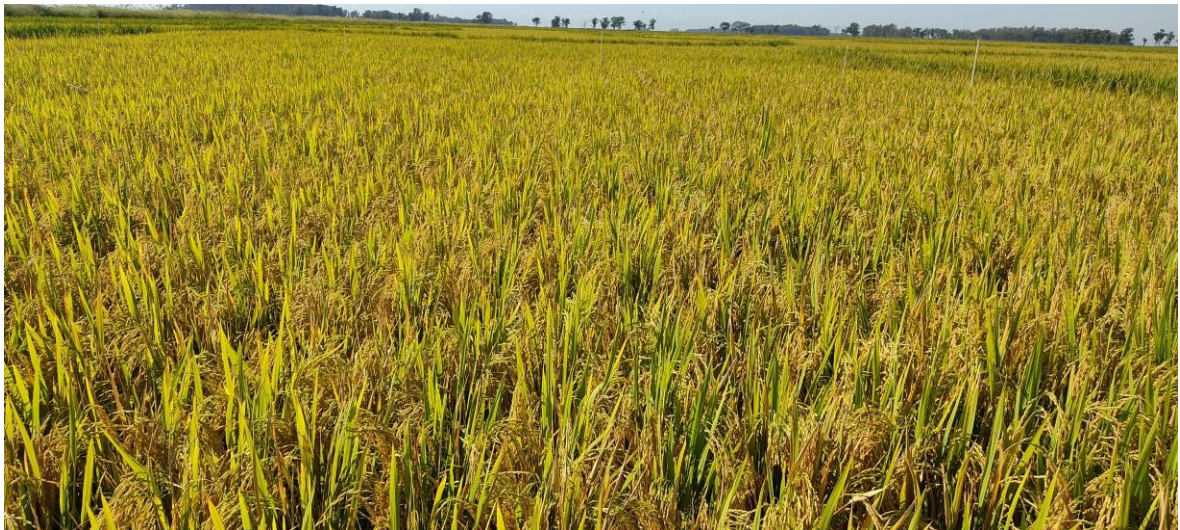

Photo 8: On the left, the control NPK 150 applied in the row, and on the right, treatment 9 (Humus 20 + NPK 100 applied in the row). They did not differ statistically from each other, but the Humus + NPK treatment showed a 4% higher yield compared to the control.

## **FINAL COMMENTS**

The essay is based on a little-known topic for rice cultivation in our country: the use of the fertilizer additive MO Humus from the Paraguayan company Tiróleo .

Starting with the NPK fertilizer dosage recommended by a technical expert based on soil analysis, two doses of OM humus were tested, both in addition to and in place of the fertilizer, and compared with a commercial control (fertilizer alone). Furthermore, all treatments were applied in duplicate, incorporated into the row or broadcast as a cover crop, to compare the effectiveness of both localization methods.

The trial was installed in a commercial field of the INIA CL 19231 variety, a new material with high expansion potential, in the third section of the Treinta y Tres department, on Planosol soils. Subeutrics Ochrics with a silty loam texture , belonging to the La Charqueada unit.

## **CONCLUSIONS**

### **Performance**

With a general average of the test of 12818 kg/ ha , statistically significant differences were found at 5%, due to the treatments.

Treatments with the combinations of MO Humus + NPK of 50 + 100 and 20 + 150, regardless of the location method, were positioned at the top of the yields, significantly surpassing the rest and not differing statistically from each other (see graph No. 1).

These four higher-performing treatments achieved significant productive response between 13 and 14% over the commercial control (only NPK 150 fertilizer online) (see graph No. 2).

When grouping yields by location method, no differences were found between the two methods. On the other hand, the 50 + 100 and 20 + 150 doses of OM humus + NPK fertilizer recorded the highest average yields, considering all the dose combinations evaluated.

Observing the different productive responses by grouping treatments by the dose of the additive and the fertilizer allows us to compare the effectiveness achieved based on the location method and from here arises one of the most important conclusions of the test: in none of the combinations of doses of MO Humus and NPK fertilizer were statistically significant differences found by the location method (see graph No. 4).

The most eloquent trends were observed with the highest dose of MO Humus and NPK where the treatment applied in the line stood out over the broadcast treatment and on the contrary with the lowest dose of both and with fertilization only with NPK the trend was favorable to the broadcast application in coverage.

Grouping the results by the location method (see graph No. 5) allows us to highlight the main conclusions drawn from this test:

- I) By applying MO Humus and NPK fertilizer in the line, all treatments with the bioactivator significantly outperformed the commercial control (only NPK fertilizer), with the exception of the combination with the lowest dose of both, from which it did not differ statistically.
- II) When applying OM humus and NPK fertilizer broadcast on the mulch, only the 50 + 100 and 20 + 150 combinations significantly outperformed the commercial control (NPK fertilizer only). The remaining combinations did not differ statistically from the control.

In summary:



- ❑ Two of the combinations of MO Humus and NPK fertilizer achieved significant productive response over the best commercial control (only NPK fertilizer broadcast), with no differences due to the location method.
- ❑ The type of response was variable, in one case the addition of MO Humus replacing 1:1 the dose of NPK fertilizer caused a significant increase in yield and in the other the response was achieved by adding the lowest dose of the bioactivator to the dose of the NPK control.
- ❑ The addition of MO Humus achieved the best performance at a higher dose, being a substitute for NPK, and at a lower dose, being a fertilizer additive.

**SUPPLEMENTAL MATERIAL #5****SM5**

| pathway                   | 13         | 14         | 4          | 5          | 6          |
|---------------------------|------------|------------|------------|------------|------------|
| PWY-3781                  | 147816.26  | 89228.887  | 108146.193 | 131609.691 | 84475.2878 |
| PWY-5101                  | 81267.1096 | 49228.8628 | 54131.3733 | 64681.0301 | 30363.7755 |
| ILEUSYN-PWY               | 78744.8733 | 47703.5285 | 50824.9266 | 65032.3199 | 29417.4454 |
| VALSYN-PWY                | 78744.8733 | 47703.5285 | 50824.9266 | 65032.3199 | 29417.4454 |
| PWY-7663                  | 80545.1055 | 47236.5197 | 48041.3129 | 63568.5044 | 20376.5504 |
| PWY-5973                  | 79161.7998 | 47184.1586 | 48265.7793 | 60638.6945 | 21750.0688 |
| PWY-7111                  | 77713.474  | 45378.7018 | 50781.0802 | 64388.5686 | 34111.6097 |
| BRANCHED-CHAIN-AA-SYN-PWY | 70329.9256 | 42273.712  | 49055.7334 | 52906.1907 | 26600.9043 |
| FASYN-ELONG-PWY           | 69130.3606 | 38948.4063 | 42017.7684 | 61456.1084 | 20376.5504 |
| NONOXIPENT-PWY            | 64031.4887 | 38619.0731 | 45412.1757 | 50839.587  | 26035.9345 |
| TCA                       | 62402.7803 | 37308.0334 | 45007.8115 | 49463.1298 | 25869.25   |
| PWY-5103                  | 62150.4849 | 37272.1936 | 43938.5988 | 46086.5236 | 23470.0835 |
| PWY-3001                  | 60639.1054 | 36801.1805 | 41588.5579 | 48663.1579 | 23689.5484 |
| PWYG-321                  | 58291.7522 | 36764.1589 | 28125.0032 | 61817.6323 | 3815.11717 |
| PWY-5667                  | 61700.1486 | 36743.7145 | 45255.6138 | 37918.6807 | 22087.7291 |
| PWY0-1319                 | 61700.1486 | 36743.7145 | 45255.6138 | 37918.6807 | 22087.7291 |
| PWY-6969                  | 61135.7783 | 35970.6834 | 45226.2258 | 49370.4442 | 27451.8284 |
| PWY-7208                  | 59080.1621 | 35547.7248 | 40943.1719 | 42519.1602 | 23539.6705 |
| PWY-7664                  | 55822.2526 | 35300.5149 | 26875.379  | 57857.1358 | 3655.98895 |
| PWY-7229                  | 59354.1967 | 34950.9998 | 43894.0937 | 38896.5205 | 22326.9253 |
| THRESYN-PWY               | 57197.5741 | 34720.9303 | 38450.2788 | 47901.8931 | 23183.7144 |
| PWY-5989                  | 54173.5414 | 34204.6756 | 25596.6535 | 59850.6573 | 3277.24065 |
| PWY-6282                  | 53505.0885 | 34182.8796 | 25145.442  | 58586.6201 | 3228.85802 |
| PWY-7219                  | 58185.9767 | 34007.8186 | 44742.5487 | 36093.0074 | 20865.7927 |
| REDCITCYC                 | 53687.3552 | 33852.0178 | 20849.1062 | 51826.6297 | 25972.4566 |
| PWY-7220                  | 56056.5626 | 33675.13   | 40326.9027 | 40035.4593 | 23332.5105 |
| PWY-7222                  | 56056.5626 | 33675.13   | 40326.9027 | 40035.4593 | 23332.5105 |
| PWY-6126                  | 57066.2715 | 33625.1229 | 42496.9968 | 37601.3482 | 21651.5809 |
| DTDPRHAMSYN-PWY           | 53639.8653 | 33289.8468 | 34997.8588 | 35731.0057 | 15678.7307 |
| PWY-2942                  | 56213.2933 | 33189.6777 | 37897.9202 | 42578.3698 | 23518.4457 |
| PWY0-862                  | 51927.1322 | 32979.731  | 24574.0826 | 53835.2005 | 3178.57891 |
| PWY-5686                  | 55887.3754 | 32943.1778 | 41628.9328 | 37126.4408 | 20023.8752 |
| PWY0-162                  | 55788.1091 | 32903.3422 | 41999.9239 | 37221.6908 | 20430.9198 |
| PHOSLIPSYN-PWY            | 57437.9429 | 32616.1855 | 44037.3037 | 37974.5471 | 22177.7984 |
| PWY-5659                  | 54300.9275 | 32058.7196 | 41532.0438 | 39283.3505 | 25708.2883 |
| PWY-7228                  | 53438.7408 | 31918.789  | 39408.0765 | 39788.2783 | 23778.6958 |
| ANAGLYCOLYSIS-PWY         | 53421.707  | 31777.2948 | 39816.313  | 39845.2285 | 24298.3268 |
| PWY-5097                  | 53611.5313 | 31691.8775 | 35535.1056 | 41138.2148 | 23399.1545 |
| PWY-6121                  | 53522.0629 | 31567.5744 | 38297.5601 | 36491.8066 | 20944.8787 |
| PWY-841                   | 53244.7472 | 31430.0833 | 39075.9971 | 36495.9416 | 21048.747  |
| PWY-6122                  | 53678.2112 | 31369.4705 | 38669.1178 | 37639.7815 | 20768.0723 |
| PWY-6277                  | 53678.2112 | 31369.4705 | 38669.1178 | 37639.7815 | 20768.0723 |
| PWY-6125                  | 52295.6109 | 31149.1554 | 38828.9358 | 38312.8602 | 22809.1107 |
| CALVIN-PWY                | 51515.1763 | 31121.3276 | 37678.4114 | 36065.4266 | 21601.7545 |
| PWY4FS-8                  | 54999.6352 | 30979.6141 | 41769.0455 | 36615.9805 | 21183.4988 |
| PWY4FS-7                  | 54999.6352 | 30979.6141 | 41769.0455 | 36615.9805 | 21183.4988 |
| FAO-PWY                   | 50727.3713 | 30944.8062 | 29142.4229 | 41756.5804 | 27066.488  |
| FASYN-INITIAL-PWY         | 47139.6633 | 30696.394  | 22353.9554 | 47432.1568 | 2810.65195 |
| PWY-7094                  | 51671.5575 | 30667.9966 | 30881.053  | 40233.9949 | 25153.2629 |
| PENTOSE-P-PWY             | 49062.1551 | 30164.9458 | 33209.636  | 45568.3038 | 22638.4176 |

|                      |            |            |            |            |            |
|----------------------|------------|------------|------------|------------|------------|
| TRPSYN-PWY           | 51056.1981 | 30139.485  | 38670.5596 | 34943.6247 | 20800.9486 |
| COMPLETE-ARO-PWY     | 51777.9114 | 29790.0252 | 40092.2616 | 34432.9546 | 19899.9861 |
| PWY-7221             | 49826.7114 | 29542.2482 | 37814.4215 | 37777.9003 | 22483.6322 |
| P108-PWY             | 51147.1568 | 29362.8771 | 37877.0862 | 39061.6351 | 16569.784  |
| PWY-5188             | 48879.9152 | 28851.9644 | 36141.1236 | 35563.5515 | 20946.6084 |
| PWY-7211             | 47904.3287 | 28800.8908 | 28791.8246 | 33762.2792 | 17098.9151 |
| SER-GLYSYN-PWY       | 53749.4364 | 28687.6477 | 33713.5105 | 34379.2631 | 24462.8373 |
| COA-PWY              | 49229.3471 | 28649.6626 | 37242.6563 | 32671.322  | 19945.1915 |
| GLYCOLYSIS           | 46992.6641 | 28483.7459 | 36599.1268 | 39843.0415 | 22431.0368 |
| PWY-6163             | 48151.6708 | 28293.806  | 36982.323  | 32511.3735 | 17664.4568 |
| POLYISOPRENSYN-PWY   | 47942.9074 | 28145.3911 | 36608.5264 | 32911.0889 | 20879.1221 |
| TRNA-CHARGING-PWY    | 47123.536  | 28012.5748 | 32556.6925 | 30842.5693 | 17943.794  |
| RIBOSYN2-PWY         | 47833.0413 | 28011.5448 | 34984.171  | 31923.5241 | 17700.0754 |
| GLUCONEO-PWY         | 45264.0428 | 27986.2765 | 31400.1721 | 39212.4447 | 19624.5286 |
| ARO-PWY              | 48697.7984 | 27979.2413 | 37749.1203 | 33222.8011 | 18503.5855 |
| PWY0-1586            | 38623.3439 | 27826.3466 | 22588.4321 | 69906.1471 | 43341.2296 |
| SULFATE-CYS-PWY      | 47055.8768 | 27765.9446 | 24812.9222 | 29775.1867 | 17943.6195 |
| PWY-5189             | 46165.8597 | 27747.7946 | 33974.2036 | 36081.6684 | 20643.1664 |
| PWY-6897             | 44049.6033 | 27666.9639 | 30935.9023 | 34165.0389 | 15586.9742 |
| PWY-6387             | 46148.1715 | 27590.6044 | 36480.7577 | 34824.3754 | 19962.977  |
| PEPTIDOGLYCANSYN-PWY | 46266.0207 | 27571.502  | 36333.5013 | 34142.9417 | 19419.1956 |
| HISTSYN-PWY          | 45052.0806 | 27544.4962 | 33321.826  | 32960.9448 | 18956.4663 |
| PWY-6123             | 46808.9064 | 27396.0322 | 34689.8044 | 31118.9184 | 17377.4628 |
| PWY-5345             | 45774.07   | 27349.4285 | 25225.4745 | 25535.6604 | 15558.3652 |
| PWY-7197             | 46031.1972 | 27348.2795 | 36156.8713 | 32132.7487 | 19401.9313 |
| HEMESYN2-PWY         | 43227.7862 | 27231.3453 | 31701.673  | 34161.9552 | 19042.4782 |
| 1CMET2-PWY           | 43695.0172 | 26920.2779 | 26636.4688 | 27813.1521 | 12291.8006 |
| P105-PWY             | 46070.9305 | 26648.7958 | 33834.6015 | 38733.5314 | 20356.7479 |
| PWY-7184             | 45138.0513 | 26611.8705 | 29949.2088 | 31220.0862 | 15226.4439 |
| PWY-6385             | 43824.549  | 26490.2883 | 32712.703  | 34140.8888 | 20220.6192 |
| PWY-7539             | 42247.2666 | 26351.1222 | 28805.5286 | 30812.4251 | 18498.319  |
| PWY-6386             | 43320.2634 | 26347.2146 | 32479.176  | 35177.9544 | 20129.9079 |
| PANTO-PWY            | 44228.2964 | 26324.8492 | 31984.7014 | 33349.6347 | 20497.8911 |
| PWY-6147             | 41693.5245 | 25973.0447 | 28626.9636 | 29847.5185 | 17297.0547 |
| GLUTORN-PWY          | 45431.8671 | 25838.4698 | 33804.772  | 29694.8257 | 19356.9577 |
| PWY-7323             | 46151.7201 | 25677.6208 | 34555.907  | 35785.5332 | 6976.0269  |
| SO4ASSIM-PWY         | 42151.6142 | 25656.0678 | 19569.4824 | 39879.6458 | 19544.7892 |
| PWY-5484             | 41167.9401 | 25536.1903 | 32615.0349 | 37786.9644 | 20494.2852 |
| PANTOSYN-PWY         | 41596.657  | 25511.8162 | 29960.5788 | 32580.4979 | 19685.8252 |
| PWY-7234             | 42122.011  | 25379.0815 | 27072.636  | 25249.5692 | 16390.2816 |
| DAPLYSINESYN-PWY     | 43380.7804 | 25255.1835 | 28752.3975 | 32456.9092 | 18721.3804 |
| PWY0-1261            | 39243.3706 | 25247.2535 | 23697.7105 | 37989.6944 | 24753.9964 |
| FOLSYN-PWY           | 40556.721  | 25083.5187 | 26748.7184 | 27709.8413 | 14852.3766 |
| PWY-5918             | 39469.8782 | 24885.5653 | 26581.9454 | 33138.1838 | 18271.3066 |
| PWY-5913             | 39615.868  | 24875.8735 | 25702.5344 | 34980.3092 | 18992.064  |
| ARGSYN-PWY           | 41533.1536 | 24819.7273 | 32506.3471 | 27355.8487 | 19308.5621 |
| PWY-6700             | 44267.9797 | 24818.9798 | 29410.789  | 19237.5604 | 11977.4852 |
| PWY-7400             | 41478.9347 | 24813.0844 | 32444.5494 | 27400.3145 | 19207.8372 |
| PWY-5695             | 49713.6328 | 24615.1115 | 29601.7805 | 51030.6722 | 21258.1708 |
| PWY-5154             | 40852.0919 | 24570.9423 | 27554.8592 | 23792.4461 | 11392.6595 |
| PWY-5121             | 41046.1175 | 24306.5669 | 25622.2132 | 35398.9818 | 21098.6162 |
| PYRIDNUCSYN-PWY      | 42753.8819 | 24272.2644 | 31440.5198 | 29935.6108 | 15079.2658 |

|                             |            |            |            |            |            |
|-----------------------------|------------|------------|------------|------------|------------|
| P23-PWY                     | 46631.4271 | 24217.162  | 39245.5127 | 34243.3584 | 20427.1068 |
| PWY0-166                    | 41070.5825 | 23972.673  | 29163.8958 | 29547.8465 | 14844.436  |
| NONMEVIP-PWY                | 39953.7104 | 23808.3259 | 23815.0767 | 32803.6999 | 19169.2704 |
| PWY-7560                    | 39953.7104 | 23808.3259 | 23815.0767 | 32803.6999 | 19169.2704 |
| GLYCOLYSIS-E-D              | 39912.2773 | 23528.5575 | 25600.5364 | 35742.1615 | 17864.2828 |
| THISYN-PWY                  | 35931.3993 | 23499.7996 | 17537.9655 | 31370.4371 | 7098.33839 |
| OANTIGEN-PWY                | 41767.9013 | 23335.2535 | 33479.6037 | 25779.0257 | 17258.8187 |
| ARGSYNBSUB-PWY              | 43399.5791 | 23301.4304 | 34640.9771 | 28438.6107 | 21139.9415 |
| HSERMETANA-PWY              | 40647.4875 | 23242.2917 | 25123.4606 | 30527.0089 | 11455.8025 |
| PWY-6612                    | 36902.817  | 23106.4538 | 23556.4129 | 25826.7508 | 12894.4485 |
| NAGLIPASYN-PWY              | 39512.2887 | 22961.282  | 24374.6137 | 14644.8091 | 1078.85914 |
| COLANSYN-PWY                | 40659.1182 | 22622.2432 | 24309.2242 | 30811.6784 | 4902.8059  |
| GLYCOLYSIS-TCA-GLYOX-BYPASS | 34001.3316 | 22458.0667 | 25843.5336 | 33819.8602 | 17199.6093 |
| PWY-6608                    | 38120.9148 | 21939.7858 | 24183.3039 | 47922.1345 | 8342.7227  |
| PWY-6467                    | 38578.33   | 21887.35   | 24649.34   | 13716      | 968.75     |
| P4-PWY                      | 37684.8506 | 21820.825  | 25013.8372 | 32497.8376 | 16477.809  |
| PWY0-781                    | 36954.6745 | 21704.1166 | 24615.1092 | 23864.7242 | 16136.9636 |
| PWY-1269                    | 38249.1759 | 21629.9082 | 24872.8656 | 13722.4969 | 1044.35135 |
| ANAEROFRUCAT-PWY            | 38157.9027 | 21468.3524 | 28671.309  | 32492.0926 | 18124.7518 |
| UDPNAGSYN-PWY               | 39831.0448 | 21403.1555 | 38656.9964 | 24338.8306 | 20592.2351 |
| SALVADEHYPOX-PWY            | 39214.7114 | 21288.3632 | 23990.311  | 49615.7504 | 9710.73924 |
| HEME-BIOSYNTHESIS-II        | 31315.5996 | 21015.7663 | 19248.4886 | 30317.2221 | 15691.4494 |
| PWY-7254                    | 22868.7813 | 20987.8242 | 3606.92741 | 29538.6366 | 13925.2119 |
| PWY-5971                    | 38284.3215 | 20965.9562 | 17025.9696 | 4457.85584 | 4582.76098 |
| PWY-7200                    | 35333.1417 | 20940.9526 | 21827.7495 | 30386.1207 | 16772.5421 |
| GLYCOGENSYNTH-PWY           | 34509.0162 | 20915.753  | 26483.0392 | 25784.1919 | 17191.6454 |
| PWY-7392                    | 32367.321  | 20854.5994 | 20198.2657 | 32312.6626 | 19784.1193 |
| PWY-5347                    | 35172.7259 | 20116.7706 | 22608.774  | 38199.4056 | 16061.2833 |
| PWY-7196                    | 36661.106  | 20115.4713 | 25843.5885 | 23327.4541 | 18369.9679 |
| PWY-6609                    | 32144.0708 | 20073.819  | 22186.3555 | 39794.1717 | 23551.5153 |
| P42-PWY                     | 37643.1251 | 19654.7255 | 37012.3585 | 26502.9477 | 22878.0262 |
| PWY-6703                    | 36712.8752 | 19507.3223 | 29094.7874 | 9172.91741 | 9707.69728 |
| HISDEG-PWY                  | 30045.4975 | 18931.0339 | 14589.5789 | 30700.023  | 11860.4409 |
| FERMENTATION-PWY            | 26748.6485 | 18862.7261 | 15052.1874 | 12747.8447 | 15855.275  |
| MET-SAM-PWY                 | 32903.2428 | 18840.7116 | 21134.5649 | 34441.4083 | 15941.5481 |
| TCA-GLYOX-BYPASS            | 26637.3241 | 18536.6711 | 19973.7379 | 29378.6148 | 15026.4317 |
| BIOTIN-BIOSYNTHESIS-PWY     | 28219.9574 | 18048.3387 | 20384.889  | 14935.2618 | 4117.24515 |
| LEU-DEG2-PWY                | 30292.2083 | 17785.8265 | 10749.0673 | 16531.025  | 1965.05429 |
| PWY-6519                    | 27457.586  | 17713.4384 | 21001.9448 | 13338.7004 | 3498.81487 |
| PWY-5855                    | 28266.3914 | 17423.4984 | 21039.6008 | 13714.721  | 3414.13738 |
| PWY-5856                    | 28266.3914 | 17423.4984 | 21039.6008 | 13714.721  | 3414.13738 |
| PWY-5857                    | 28266.3914 | 17423.4984 | 21039.6008 | 13714.721  | 3414.13738 |
| PWY-6708                    | 28266.3914 | 17423.4984 | 21039.6008 | 13714.721  | 3414.13738 |
| PWY-7199                    | 28872.4671 | 17230.889  | 15273.1621 | 28877.4427 | 15066.6751 |
| PWY-6353                    | 32269.8792 | 17195.6061 | 19838.7166 | 45800.6523 | 11733.4012 |
| UBISYN-PWY                  | 27731.4303 | 17050.2936 | 20778.5244 | 12642.0778 | 2638.46268 |
| GLYCOCAT-PWY                | 30990.3459 | 16935.0288 | 23251.8467 | 11368.5263 | 11620.4574 |
| PWY-6628                    | 27548.923  | 16321.1762 | 16841.018  | 4375.57073 | 4422.91767 |
| PWY-6630                    | 27321.6722 | 16210.8175 | 16832.215  | 4375.25017 | 4421.7925  |
| PWY-6737                    | 29432.5465 | 16105.6102 | 16439.8022 | 11782.7839 | 11368.4054 |
| PWY-6317                    | 26284.0885 | 15881.9874 | 14919.9834 | 36820.8591 | 20305.9775 |
| PWY-7242                    | 23238.7638 | 15863.5691 | 5867.06892 | 31459.0506 | 7738.15653 |

|                               |            |            |            |            |            |
|-------------------------------|------------|------------|------------|------------|------------|
| PWY-5104                      | 33866.9696 | 15744.3236 | 33116.9782 | 22940.895  | 19873.0448 |
| PYRIDNUCSAL-PWY               | 26542.0619 | 15213.6212 | 21766.059  | 22092.4164 | 11493.6946 |
| PWY-4984                      | 22220.2658 | 14509.3589 | 12441.576  | 26371.5781 | 13585.402  |
| PWY-6892                      | 19132.4355 | 14043.5253 | 6482.85108 | 22063.7776 | 2230.27462 |
| PWY-5920                      | 23079.3834 | 14036.3279 | 17720.4377 | 23930.5174 | 3812.57175 |
| PWY-5505                      | 22026.1155 | 13874.4973 | 12871.4769 | 12716.7222 | 7679.16923 |
| GALACTUROCAT-PWY              | 18720.6758 | 13850.379  | 3788.82978 | 29549.0504 | 7008.68366 |
| GLYOXYLATE-BYPASS             | 23572.7336 | 13226.7231 | 16797.3586 | 24895.413  | 15870.5059 |
| HOMOSER-METSYN-PWY            | 23019.1736 | 12545.1318 | 14854.1642 | 31477.5531 | 13113.0608 |
| PWY0-1241                     | 23289.4652 | 12353.1103 | 13588.0864 | 12593.2773 | 208.558178 |
| PWY0-1415                     | 20222.5395 | 12312.0775 | 15660.1106 | 21717.5686 | 2999.98037 |
| PWY-7431                      | 19926.187  | 12311.0912 | 3820.59762 | 33502.5881 | 4309.20084 |
| PWY-6507                      | 15688.2087 | 12284.4369 | 1785.44317 | 19485.8455 | 7251.73482 |
| P164-PWY                      | 25894.458  | 12242.6683 | 16317.5971 | 0          | 136.203346 |
| PWY0-1061                     | 14995.429  | 11870.8261 | 6641.15584 | 12556.6789 | 14515.5104 |
| ARG+POLYAMINE-SYN             | 18402.533  | 11324.8987 | 13083.1124 | 19143.2901 | 14912.8809 |
| PWY-6263                      | 18413.5657 | 11240.7344 | 15103.3886 | 23600.9563 | 5385.96723 |
| PWY-5838                      | 19037.6795 | 11099.4419 | 10614.4436 | 7934.09098 | 2923.15557 |
| PWY-6901                      | 18018.686  | 10935.0542 | 12331.6622 | 15569.8082 | 10692.4922 |
| PWY-7328                      | 16676.6072 | 10923.9032 | 3696.16549 | 2788.86608 | 1304.25092 |
| PWY0-1479                     | 18450.9601 | 10781.0904 | 10976.1367 | 2709.06786 | 534.598449 |
| DENOVOPURINE2-PWY             | 21070.1572 | 10624.3982 | 10920.5142 | 12287.9874 | 16179.1217 |
| PWY-181                       | 18045.6276 | 10583.1236 | 12128.2299 | 3417.27886 | 3198.14123 |
| PWY-5897                      | 17943.5688 | 10484.2174 | 9820.2592  | 7674.94052 | 2981.18436 |
| PWY-5898                      | 17943.5688 | 10484.2174 | 9820.2592  | 7674.94052 | 2981.18436 |
| PWY-5899                      | 17943.5688 | 10484.2174 | 9820.2592  | 7674.94052 | 2981.18436 |
| PWY-6478                      | 17632.6217 | 10318.8761 | 10944.7902 | 12866.4162 | 15.6689135 |
| COBALSYN-PWY                  | 15741.8965 | 10108.2276 | 9851.52776 | 25529.4424 | 18905.8565 |
| PWY-6151                      | 17862.9654 | 10078.2455 | 4914.09202 | 10033.6305 | 9300.98719 |
| PWY-5840                      | 16868.6128 | 10026.8475 | 10310.3905 | 7993.88412 | 3224.96424 |
| PRPP-PWY                      | 19367.2933 | 9827.61393 | 10260.3927 | 11558.001  | 15750.0742 |
| PWY-6269                      | 13797.2431 | 9407.84265 | 8725.3817  | 21330.3691 | 10004.5568 |
| PWY-5509                      | 13709.3925 | 9347.0757  | 8649.76791 | 21323.7937 | 10062.348  |
| PWY-7371                      | 14975.9462 | 9266.05805 | 8214.5135  | 24813.6055 | 13290.1424 |
| PWY-7187                      | 17024.9563 | 8661.13275 | 9051.02911 | 10313.7552 | 10783.807  |
| ASPASN-PWY                    | 8274.86068 | 8511.09541 | 3629.03956 | 4141.80712 | 5925.80625 |
| PWY-5861                      | 14544.3662 | 8491.9274  | 7803.86234 | 5781.7628  | 2064.57553 |
| ALL-CHORISMATE-PWY            | 14280.5297 | 8420.87013 | 5268.68402 | 2877.47235 | 1767.19456 |
| P124-PWY                      | 16934.3097 | 8307.39209 | 7296.42022 | 36190.5519 | 14455.4913 |
| PWY-5022                      | 15457.8672 | 8304.6313  | 14236.9212 | 20993.335  | 19969.8155 |
| PWY-6545                      | 15191.1889 | 8303.59205 | 22657.3345 | 25508.3572 | 17027.6599 |
| NADSYN-PWY                    | 10571.6829 | 8028.30488 | 2881.43721 | 617.717761 | 1799.82155 |
| PWY-7374                      | 9041.32396 | 7661.21849 | 3188.42705 | 24310.7271 | 12476.852  |
| POLYAMSYN-PWY                 | 11912.6169 | 7622.47492 | 8225.39402 | 14816.4691 | 12917.1593 |
| POLYAMINSYN3-PWY              | 11929.6198 | 7594.84542 | 5962.28168 | 6221.5676  | 1450.49927 |
| GALACT-GLUCUROCAT-PWY         | 12109.8554 | 7402.5651  | 1279.28701 | 18338.1174 | 1829.32802 |
| PROTocatechuate-ortho-cleavag | 12245.3037 | 7348.41665 | 6178.26105 | 14984.7864 | 4295.87353 |
| PWY0-1296                     | 13779.1046 | 7174.31781 | 7776.78802 | 12884.7185 | 16453.8444 |
| PWY-5845                      | 13288.3128 | 7003.17326 | 3333.1788  | 1543.61799 | 1090.95633 |
| PWY-5850                      | 13288.3128 | 7003.17326 | 3333.1788  | 1543.61799 | 1090.95633 |
| PWY-5896                      | 13288.3128 | 7003.17326 | 3333.1788  | 1543.61799 | 1090.95633 |
| PWY-1861                      | 2515.68486 | 6932.68031 | 3605.54311 | 6167.72236 | 13403.9256 |



|                     |            |            |            |            |            |
|---------------------|------------|------------|------------|------------|------------|
| PWY490-3            | 10603.9965 | 6762.81783 | 568.251268 | 10777.5081 | 1029.50437 |
| PWY-5100            | 16917.6705 | 6631.94477 | 10960.4819 | 14675.2789 | 14386.2878 |
| TYRFUMCAT-PWY       | 10630.4208 | 6629.72718 | 4675.35869 | 1206.92072 | 1275.49653 |
| PWY-7332            | 11251.0488 | 6626.23196 | 3321.51476 | 7315.79315 | 4248.30461 |
| PWY-5863            | 11012.3717 | 6613.90566 | 5220.81129 | 6427.33323 | 1746.20113 |
| PWY-5028            | 9791.91727 | 6526.59911 | 2813.58262 | 1130.27927 | 1539.64266 |
| PWY0-1297           | 12647.1245 | 6425.94652 | 8226.68878 | 15932.5893 | 18744.447  |
| PYRIDOXYN-PWY       | 8265.92226 | 6399.89756 | 9378.32976 | 397.697298 | 363.988487 |
| GLUCUROCAT-PWY      | 12183.6751 | 6397.1027  | 1883.3375  | 15732.1902 | 2835.54023 |
| PPGPPMET-PWY        | 9985.95368 | 6360.80269 | 4959.66506 | 1650.05083 | 630.183095 |
| PWY-5837            | 10003.2238 | 6015.42347 | 4679.47896 | 5724.36018 | 1539.07951 |
| PWY0-1298           | 11496.8005 | 5777.37605 | 7618.67372 | 12304.8874 | 13986.4365 |
| PWY-5651            | 7280.24364 | 5719.33398 | 1864.06319 | 389.132745 | 1181.94566 |
| SUCSYN-PWY          | 4773.13478 | 5379.99943 | 996.223525 | 0          | 73.0112127 |
| NAD-BIOSYNTHESIS-II | 8555.50013 | 5377.55064 | 1336.10834 | 19168.116  | 301.089104 |
| P161-PWY            | 8863.15436 | 5328.95957 | 7949.00431 | 13111.1416 | 22197.4068 |
| RUMP-PWY            | 1890.20619 | 5259.46961 | 2709.99391 | 4692.24979 | 10638.3941 |
| PWY-5860            | 9723.3534  | 5081.15663 | 2289.13798 | 1046.41579 | 742.855162 |
| PWY-5862            | 9723.3534  | 5081.15663 | 2289.13798 | 1046.41579 | 742.855162 |
| P122-PWY            | 8914.76931 | 5021.13894 | 5887.83319 | 11061.326  | 6232.46921 |
| PWY0-845            | 8012.39633 | 4964.45565 | 6124.52955 | 864.476028 | 798.672589 |
| PWY-5747            | 6277.04895 | 4937.66519 | 3209.03914 | 2195.2527  | 390.903346 |
| PWY0-42             | 5729.96141 | 4776.64472 | 2000.64299 | 2571.7336  | 472.632693 |
| GLUCOSE1PMETAB-PWY  | 4693.40733 | 4775.463   | 544.773221 | 428.822348 | 599.179098 |
| PWY-621             | 4522.07477 | 4482.81981 | 1179.10028 | 2394.50457 | 6024.87673 |
| PWY-5384            | 4522.07477 | 4482.81981 | 539.98487  | 797.054189 | 1562.07753 |
| RHAMCAT-PWY         | 8292.34983 | 4453.04224 | 3048.90955 | 19162.0249 | 7728.32365 |
| PWY-6749            | 6533.07072 | 4420.25243 | 2436.1123  | 16378.9616 | 179.298397 |
| PWY-7376            | 7701.79687 | 4297.65017 | 4005.01959 | 9704.84902 | 2906.97016 |
| PWY0-1533           | 8291.3177  | 4121.86079 | 3985.15199 | 1646.9172  | 551.046209 |
| PWY-5419            | 6344.32048 | 4046.917   | 1537.83719 | 1856.58576 | 810.204    |
| ARGORNPST-PWY       | 7613.98134 | 3940.23919 | 4367.18977 | 3408.3444  | 1576.03758 |
| ENTBACSYN-PWY       | 6034.49974 | 3913.63687 | 4909.2665  | 4637.2103  | 4801.74257 |
| PWY-7237            | 5121.08    | 3822.2     | 5193.66    | 22388.89   | 23677.78   |
| PWY-5304            | 3804.96    | 3816.65    | 2880.61    | 27965.05   | 15571.61   |
| PWY-5676            | 8161.43739 | 3481.95728 | 4162.86901 | 1497.41949 | 2819.3639  |
| P125-PWY            | 2678.21048 | 3352.96137 | 437.638613 | 3242.33527 | 3401.32149 |
| PWY-7007            | 5080.29622 | 3326.74618 | 1855.75214 | 6973.56605 | 1221.88589 |
| PWY-5180            | 5741.52417 | 3317.84482 | 2896.89723 | 5526.64468 | 8396.83234 |
| PWY-5182            | 5741.52417 | 3317.84482 | 2896.89723 | 5526.64468 | 8396.83234 |
| DENITRIFICATION-PWY | 4740.80932 | 3309.97459 | 1033.72291 | 438.875882 | 558.010544 |
| PWY-5655            | 4763.11207 | 3284.99721 | 1275.31713 | 442.798094 | 868.700921 |
| PWY-7315            | 5727.20022 | 3240.21942 | 339.511575 | 0          | 179.103964 |
| PWY-5741            | 6641.92666 | 3192.89577 | 2285.636   | 0          | 63.8825822 |
| PWY-1622            | 4650.71673 | 3191.64795 | 3767.27772 | 0          | 155.081205 |
| PWY-5420            | 5027.36701 | 3152.89783 | 1823.57743 | 2623.47455 | 1332.49415 |
| PWY0-321            | 4816.88558 | 3137.65913 | 1719.97799 | 806.730162 | 276.259929 |
| PWY-6396            | 2877.34859 | 3061.95405 | 779.380657 | 1754.1375  | 342.266589 |
| PWY-5647            | 3748.44472 | 2993.06814 | 769.892612 | 267.45872  | 470.230777 |
| PWY-6383            | 3938.61591 | 2870.96362 | 3659.40903 | 22969.503  | 10170.1109 |
| PWY-5415            | 4641.20017 | 2847.35905 | 2597.46079 | 4928.18422 | 7058.02479 |
| PWY-5654            | 3620.99376 | 2801.06377 | 803.826004 | 356.213731 | 454.819048 |

|                             |            |            |            |            |            |
|-----------------------------|------------|------------|------------|------------|------------|
| PWY-6588                    | 4548.53532 | 2774.37925 | 484.820102 | 1465.76005 | 4451.66347 |
| PWY-6876                    | 4548.53532 | 2774.37925 | 484.820102 | 1465.76005 | 593.348195 |
| PWY-5910                    | 2878.316   | 2737.75684 | 1134.084   | 33.0339514 | 419.349797 |
| P441-PWY                    | 3413.75966 | 2679.18918 | 2281.76253 | 1627.82161 | 2490.96103 |
| PWY-6071                    | 4294.65021 | 2608.80754 | 1367.54801 | 871.621322 | 307.109862 |
| CODH-PWY                    | 4924.31418 | 2533.78424 | 8302.38988 | 107.394488 | 1006.59966 |
| P281-PWY                    | 3599.2084  | 2484.7429  | 1505.14493 | 1890.24345 | 464.326036 |
| HEXITOLDEGSUPER-PWY         | 3465.84671 | 2473.32032 | 6754.54359 | 9516.10074 | 8675.74562 |
| PWY-7456                    | 4824.21713 | 2403.60649 | 400.847338 | 190.958661 | 376.278956 |
| PWY-3801                    | 67.3941727 | 2398.62378 | 267.733923 | 0          | 0          |
| P562-PWY                    | 3921.83435 | 2388.61615 | 3273.51135 | 8988.79626 | 12637.6113 |
| PWY-6895                    | 3535.59742 | 2356.35361 | 2958.4341  | 18167.8502 | 13500.7353 |
| PWY-7255                    | 4003.97032 | 2332.67062 | 2337.88076 | 8184.1234  | 7126.08167 |
| PWY-7347                    | 1818.88393 | 2248.23816 | 421.822305 | 0          | 22.3552373 |
| KDO-NAGLIPASYN-PWY          | 418.37392  | 2225.02089 | 1107.27529 | 0          | 0          |
| TEICHOICACID-PWY            | 2729.38521 | 2186.63874 | 1275.26902 | 5339.71699 | 1195.30192 |
| PWY-5941                    | 5119.04876 | 2147.56916 | 738.704596 | 0          | 0          |
| PWY-5181                    | 3379.53764 | 2118.9447  | 1478.02765 | 770.315347 | 317.635533 |
| PWY-5705                    | 3202.3612  | 2026.80185 | 792.223055 | 15189.5516 | 376.882992 |
| PWY-922                     | 2053.90233 | 1977.40955 | 801.783586 | 23.1287153 | 294.757641 |
| P101-PWY                    | 3091.02719 | 1959.6576  | 494.022015 | 18307.602  | 13087.1462 |
| P381-PWY                    | 3000.18493 | 1937.98787 | 333.438543 | 814.806756 | 1322.24619 |
| PWY-7616                    | 2549.76767 | 1933.08434 | 1107.52661 | 7145.80389 | 8740.83044 |
| PWY-6505                    | 3132.90505 | 1900.35555 | 1085.22083 | 442.798094 | 654.294449 |
| P221-PWY                    | 5093.74942 | 1875.56855 | 261.3447   | 3406.31917 | 258.320608 |
| ORNDEG-PWY                  | 3047.13195 | 1825.98503 | 0          | 0          | 0          |
| PWY-6562                    | 2224.71335 | 1811.68342 | 746.991081 | 62.9452946 | 940.007483 |
| PWY-5392                    | 3209.69361 | 1804.95504 | 229.702195 | 3337.12839 | 0          |
| PWY-7090                    | 3558.66475 | 1790.41388 | 898.554454 | 0          | 195.062687 |
| PWY1G-0                     | 3012.33299 | 1767.79841 | 3659.0342  | 14761.6867 | 7674.40294 |
| CATECHOL-ORTHO-CLEAVAGE-PWY | 2106.94439 | 1747.74189 | 1917.11083 | 1723.48058 | 275.624389 |
| PWY-6182                    | 2270.83174 | 1721.14215 | 1783.55782 | 1804.35827 | 252.449543 |
| PWY-7377                    | 2719.81399 | 1719.66674 | 1641.64636 | 6.99643956 | 494.928889 |
| PWY-5417                    | 2079.52552 | 1627.1786  | 1760.93791 | 1625.6773  | 217.773909 |
| PWY-5431                    | 2079.52552 | 1627.1786  | 1760.93791 | 1625.6773  | 217.773909 |
| PWY-5507                    | 2210.70913 | 1449.23968 | 336.261683 | 0          | 600.199124 |
| PWY-6185                    | 2052.69071 | 1439.39076 | 991.240614 | 462.802463 | 162.780493 |
| PWY-6728                    | 2290.18243 | 1392.90541 | 1260.91001 | 189.149413 | 137.769348 |
| PWY-5430                    | 1985.95174 | 1388.31996 | 660.489433 | 744.505107 | 131.667901 |
| CRNFORCAT-PWY               | 1283.665   | 1385.98405 | 155.09829  | 0          | 0          |
| KETOGLUCONMET-PWY           | 1500.47852 | 1333.00192 | 357.043741 | 691.131078 | 68.4571788 |
| PWY-6590                    | 3526.16481 | 1323.17962 | 2097.33107 | 661.656135 | 1884.58601 |
| PWY-5178                    | 1635.40059 | 1288.75687 | 593.235069 | 2356.89072 | 130.723965 |
| GLCMANNANAUT-PWY            | 1321.86807 | 1283.0824  | 951.064173 | 521.514536 | 818.385627 |
| PWY-6339                    | 2497.86435 | 1253.85784 | 0          | 0          | 0          |
| PWY0-1277                   | 2230.9773  | 1194.96867 | 1082.84691 | 3644.37075 | 136.118905 |
| PWY-6167                    | 1738.87661 | 1150.17222 | 1348.66518 | 0          | 71.3133181 |
| P461-PWY                    | 940.84038  | 1106.85753 | 1835.73629 | 5105.98173 | 9786.99749 |
| PWY-5183                    | 1518.24764 | 1090.4103  | 225.624941 | 321.391748 | 76.3938969 |
| GLUCARDEG-PWY               | 2384.34678 | 1081.86059 | 1671.49859 | 204.267734 | 135.872765 |
| PWY-6174                    | 1502.83032 | 1075.10723 | 258.283757 | 0          | 73.2004177 |
| CENTFERM-PWY                | 2865.48121 | 1073.99501 | 1704.28404 | 518.396846 | 1504.59227 |

|                                |            |            |            |            |            |
|--------------------------------|------------|------------|------------|------------|------------|
| AST-PWY                        | 1973.80379 | 1044.6727  | 250.253811 | 68.8888889 | 76.7046417 |
| GALACTARDEG-PWY                | 2275.374   | 983.924738 | 1254.21007 | 173.920261 | 88.2645457 |
| GLUCARGALACTSUPER-PWY          | 2275.374   | 983.924738 | 1254.21007 | 173.920261 | 88.2645457 |
| PWY-6210                       | 1664.23468 | 979.903549 | 586.089818 | 202.49265  | 258.216294 |
| PWY-2941                       | 874.54512  | 950.913586 | 1064.45866 | 10445.1021 | 14848.0885 |
| PWY-1882                       | 1360.628   | 932.104932 | 0          | 0          | 0          |
| PWY-7003                       | 1004.80583 | 911.257956 | 523.177013 | 2572.95441 | 6827.79901 |
| METHYLGALLATE-DEGRADATION-PWY  | 2267.50828 | 904.782234 | 473.695542 | 1351.72268 | 1246.53458 |
| PWY-5531                       | 984.983819 | 903.660127 | 276.977485 | 0          | 0          |
| PWY-7159                       | 984.983819 | 903.660127 | 276.977485 | 0          | 0          |
| P163-PWY                       | 2105.89164 | 896.374589 | 2814.31531 | 11160.7703 | 2621.79289 |
| P184-PWY                       | 2122.97114 | 873.12001  | 223.431283 | 527.082106 | 434.429486 |
| PWY-6944                       | 1394.46467 | 866.226424 | 76.2287701 | 17.854013  | 0          |
| PWY-3661                       | 750.409598 | 831.685768 | 42.4604792 | 2647.62325 | 0          |
| PWY-7098                       | 1480.07821 | 831.03552  | 207.138966 | 346.268597 | 380.239153 |
| PWY-6338                       | 1353.48512 | 757.034428 | 186.230794 | 323.050788 | 351.828587 |
| PWY-7097                       | 1353.48512 | 757.034428 | 186.230794 | 323.050788 | 351.828587 |
| 3-HYDROXYPHENYLACETATE-DEGRAD/ | 1761.59419 | 755.380205 | 357.059428 | 1032.27775 | 352.756199 |
| FUCCAT-PWY                     | 1008.42148 | 749.911913 | 703.270183 | 1360.33082 | 3857.73237 |
| PWY-6957                       | 1227.18648 | 742.023149 | 0          | 0          | 0          |
| PWY-5529                       | 247.919732 | 740.251112 | 0          | 0          | 0          |
| GALLATE-DEGRADATION-I-PWY      | 1858.45731 | 736.976176 | 381.954027 | 1090.7137  | 1006.52687 |
| PWY-7295                       | 2468.2413  | 731.121771 | 1851.74629 | 0          | 0          |
| METHANOGENESIS-PWY             | 1062.24259 | 698.02085  | 1445.3296  | 0          | 110.580106 |
| PWY-6654                       | 1042.15516 | 697.846617 | 989.306334 | 0          | 54.9015837 |
| GALLATE-DEGRADATION-II-PWY     | 995.574421 | 668.239524 | 381.954027 | 1090.7137  | 1006.52687 |
| PWY-7391                       | 1021.23862 | 586.99881  | 260.241819 | 16.3810775 | 174.307443 |
| PWY-5656                       | 851.394416 | 585.539955 | 607.538648 | 0          | 0          |
| P261-PWY                       | 1031.09392 | 517.246406 | 829.723009 | 17.9928251 | 884.497348 |
| PWY-6891                       | 753.408403 | 504.958177 | 641.337836 | 6205.44283 | 8746.20725 |
| DHGLUCONATE-PYR-CAT-PWY        | 348.217132 | 494.40446  | 75.5923788 | 101.889178 | 81.8843675 |
| PWY-6641                       | 1057.08295 | 488.200557 | 214.574542 | 7.45067179 | 0          |
| PWY-5198                       | 923.114594 | 469.4506   | 971.640889 | 0          | 41.8660947 |
| CHLOROPHYLL-SYN                | 139.381971 | 467.552905 | 0          | 0          | 0          |
| HCAMHPDEG-PWY                  | 915.055684 | 446.363788 | 407.097618 | 1712.74407 | 34.3999683 |
| PWY-6690                       | 915.055684 | 446.363788 | 407.097618 | 1712.74407 | 34.3999683 |
| PWY-2221                       | 1501.42978 | 439.207326 | 0          | 0          | 0          |
| ARGDEG-PWY                     | 1.39832796 | 405.589605 | 0          | 0          | 0          |
| ORNARGDEG-PWY                  | 1.39832796 | 405.589605 | 0          | 0          | 0          |
| PWY-6349                       | 628.056685 | 397.341748 | 632.480724 | 0          | 54.2706887 |
| PWY-6572                       | 507.141489 | 393.696257 | 51.9922631 | 0          | 34.5706133 |
| PWY-722                        | 610.071574 | 384.31737  | 84.42161   | 481.999095 | 98.0769504 |
| PWY-7210                       | 54.9523643 | 377.619182 | 3112.71008 | 0          | 136.856296 |
| P621-PWY                       | 874.060342 | 375.177683 | 0          | 0          | 0          |
| PWY-6350                       | 596.592907 | 363.211515 | 613.017375 | 0          | 45.4263616 |
| PWY-1501                       | 760.055445 | 345.705723 | 0          | 0          | 0          |
| METHGLYUT-PWY                  | 0.7489722  | 344.168271 | 0          | 0          | 0          |
| PWY-7373                       | 361.340653 | 334.681283 | 0          | 0          | 379.686414 |
| PWY-6992                       | 376.39664  | 326.746135 | 819.570193 | 941.243338 | 0          |
| PWY-6731                       | 87.4082604 | 306.141555 | 306.758288 | 54.5019813 | 219.06118  |
| PWY-6471                       | 3172.34925 | 284.067096 | 0          | 14140.4298 | 0          |
| PWY-7527                       | 275.45003  | 276.152619 | 626.862069 | 5759.38268 | 8850.3199  |

|                     |            |            |            |            |            |
|---------------------|------------|------------|------------|------------|------------|
| PWY-7644            | 268.912559 | 271.824513 | 41.9825073 | 0          | 0          |
| LIPASYN-PWY         | 223.139644 | 270.496933 | 59.8874909 | 0          | 0          |
| PWY-7198            | 38.4770303 | 265.267838 | 2207.43141 | 0          | 95.8358661 |
| PWY-6470            | 1748.15673 | 236.86358  | 0          | 11032.9909 | 0          |
| PWY-6107            | 663.698272 | 208.830515 | 0          | 164.774105 | 0          |
| VALDEG-PWY          | 632.627186 | 202.851464 | 0          | 0          | 0          |
| PWY-5677            | 802.764845 | 197.242553 | 0          | 0          | 0          |
| PWY-4361            | 166.321085 | 167.502744 | 383.260209 | 3900.23823 | 7165.0923  |
| METH-ACETATE-PWY    | 579.212183 | 164.216155 | 917.222523 | 2.66649057 | 593.710675 |
| PWY-3941            | 472.533324 | 160.737266 | 0          | 0          | 0          |
| ECASYN-PWY          | 1.71408255 | 152.251129 | 0          | 0          | 0          |
| PWY-7013            | 65.9740155 | 133.802801 | 0          | 1172.54396 | 0          |
| PWY0-1338           | 191.883728 | 126.049063 | 45.1289983 | 56.4179104 | 42.7536232 |
| GOLPDLCAT-PWY       | 93.6452047 | 113.893969 | 100.190387 | 1086.04154 | 606.815415 |
| PWY-5532            | 8.9837595  | 113.490329 | 236.965367 | 0          | 0          |
| PWY-7385            | 0          | 105.000993 | 0          | 0          | 0          |
| PWY-7046            | 220.930254 | 101.67188  | 87.8385487 | 0          | 0          |
| PWY-6919            | 201.315077 | 96.1076052 | 0          | 16.8510638 | 528.553761 |
| THREOCAT-PWY        | 1.94552289 | 90.9856684 | 0          | 0          | 0          |
| PWY-7286            | 5.9828608  | 74.4902835 | 212.366622 | 0          | 17.6291093 |
| PWY-6397            | 240.598463 | 67.3888825 | 0          | 1194.30218 | 0          |
| PWY-7398            | 173.294521 | 61.8456078 | 120.690411 | 24.3968949 | 0          |
| PWY-7528            | 0          | 52.8703889 | 0          | 0          | 0          |
| P241-PWY            | 78.7774887 | 48.4522725 | 1059.21615 | 0          | 135.674815 |
| AEROBACTINSYN-PWY   | 79.1189791 | 39.0933062 | 0          | 0          | 0          |
| PWY-6915            | 27.9454851 | 36.6340321 | 0          | 10         | 467.126412 |
| PWY-6165            | 23.7245335 | 36.351724  | 305.834053 | 0          | 0          |
| PWY-5005            | 53.3510147 | 35.9635496 | 0          | 2301.76336 | 0          |
| PWY-5499            | 0          | 33.5       | 0          | 0          | 0          |
| PWY-7084            | 0          | 32.3064554 | 0          | 0          | 0          |
| PWY-1422            | 29.5820184 | 29.5608759 | 0          | 0          | 0          |
| PWY-7413            | 0          | 27.9893136 | 0          | 13.9974587 | 125.560286 |
| PWY-5088            | 352.213792 | 23.814845  | 0          | 0          | 0          |
| PWY-5679            | 114.29     | 23         | 0          | 0          | 0          |
| PWY-6148            | 14.3581189 | 22.9150967 | 346.097258 | 0          | 24.8391803 |
| PWY-3081            | 0          | 22.3046885 | 302.056169 | 0          | 0          |
| PWY-7415            | 0          | 20.1463415 | 0          | 7.8358209  | 63         |
| PWY-5634            | 96.1923483 | 19.6645588 | 0          | 0          | 0          |
| P341-PWY            | 172.166641 | 11.6474063 | 646.833294 | 0          | 0          |
| PWY-6830            | 9.69809557 | 7.5480866  | 0          | 0          | 0          |
| PWY-6404            | 795.775109 | 0          | 0          | 385.662498 | 0          |
| FUC-RHAMCAT-PWY     | 293.20643  | 0          | 293.092646 | 0          | 77.8887335 |
| PWY0-41             | 161.449061 | 0          | 0          | 547.644398 | 0          |
| PWY-6948            | 158.361915 | 0          | 0          | 0          | 0          |
| PWY-622             | 106.98556  | 0          | 101.082487 | 0          | 0          |
| GLYCOL-GLYOXDEG-PWY | 86.3892206 | 0          | 47.9059479 | 0          | 19.8346739 |
| PWY-1361            | 48.7793178 | 0          | 320.250157 | 246.308669 | 0          |
| PWY5F9-12           | 46.9561495 | 0          | 0          | 0          | 0          |
| PWY-7316            | 45.9826051 | 0          | 0          | 15.9966808 | 0          |
| LACTOSECAT-PWY      | 39.5552005 | 0          | 0          | 0          | 0          |
| LPSSYN-PWY          | 4.46616398 | 0          | 0          | 0          | 0          |
| PWY-6629            | 3.59976338 | 0          | 0          | 0          | 0          |



|          |            |   |            |            |   |
|----------|------------|---|------------|------------|---|
| PWY-6713 | 0.74866277 | 0 | 0          | 0          | 0 |
| PWY-7446 | 0.59801359 | 0 | 0          | 0          | 0 |
| PWY-5266 | 0          | 0 | 2281.10918 | 5526.64468 | 0 |
| PWY-5273 | 0          | 0 | 2281.10918 | 5526.64468 | 0 |
| PWY-6141 | 0          | 0 | 107.541264 | 0          | 0 |
| PWY-6486 | 0          | 0 | 0          | 248.216128 | 0 |
| PWY-5519 | 0          | 0 | 0          | 169.534035 | 0 |
| PWY-6942 | 0          | 0 | 0          | 15.6500561 | 0 |

# SUPPLEMENTAL MATERIAL #6

SM6

| baseMean  | log2FoldChange | lfcSE       | stat        | pvalue      | padj        | Direction | Pathway             |
|-----------|----------------|-------------|-------------|-------------|-------------|-----------|---------------------|
| 18329.262 | -1.38655405    | 0.169718827 | -8.16971268 | 3.09125E-16 | 6.24432E-14 | humus     | PWY-6545            |
| 33805.771 | -0.25471655    | 0.042043465 | -6.05840995 | 1.37474E-09 | 7.93419E-08 | humus     | GLYCOLYSIS          |
| 42269.55  | -0.19840984    | 0.033344155 | -5.95036341 | 2.67548E-09 | 1.35112E-07 | humus     | PWY-6969            |
| 44.469812 | -22.4415531    | 4.408653788 | -5.09034145 | 3.57419E-07 | 1.3127E-05  | humus     | PWY-6486            |
| 30641.907 | -0.30488892    | 0.060170403 | -5.06709128 | 4.03941E-07 | 1.35993E-05 | humus     | PWY-5484            |
| 30.483339 | -21.9338038    | 4.40922412  | -4.97452686 | 6.54072E-07 | 2.03265E-05 | humus     | PWY-5519            |
| 21.251448 | -21.2846844    | 4.410011217 | -4.82644678 | 1.38991E-06 | 3.90753E-05 | humus     | PWY-6141            |
| 26884.286 | -0.29037173    | 0.069515485 | -4.17707975 | 2.95276E-05 | 0.000551701 | humus     | ANAEROFRUCAT-PWY    |
| 1439.9056 | -13.943519     | 3.349388439 | -4.16300445 | 3.14087E-05 | 0.000551701 | humus     | PWY-5266            |
| 1439.9056 | -13.943519     | 3.349388439 | -4.16300445 | 3.14087E-05 | 0.000551701 | humus     | PWY-5273            |
| 31873.123 | -0.21914387    | 0.054834402 | -3.99646695 | 6.42949E-05 | 0.001039005 | humus     | P105-PWY            |
| 6848.7303 | -2.00846156    | 0.518262224 | -3.8753771  | 0.00010646  | 0.001485999 | humus     | HEXITOLDEGSUPER-PWY |
| 3177.0789 | -5.18385784    | 1.332245204 | -3.89106887 | 9.98036E-05 | 0.001485999 | humus     | PWY-4361            |
| 30477.427 | -0.20040647    | 0.051719126 | -3.87490053 | 0.000106668 | 0.001485999 | humus     | PWY-6386            |
| 4147.036  | -4.840422      | 1.257101893 | -3.85046115 | 0.000117896 | 0.001587661 | humus     | PWY-7527            |
| 31766.09  | -0.16311948    | 0.049417141 | -3.30086835 | 0.000963861 | 0.010816662 | humus     | PWY-5189            |
| 14260.973 | -2.53155502    | 0.785654929 | -3.22222253 | 0.001272003 | 0.011978825 | humus     | PWY-7237            |
| 6643.1125 | -2.35823581    | 0.729678837 | -3.23188188 | 0.001229779 | 0.011978825 | humus     | PWY1G-0             |
| 7257.874  | -3.8737751     | 1.208876976 | -3.20444112 | 0.00135325  | 0.012425292 | humus     | PWY-2941            |
| 4305.9771 | -3.74039945    | 1.2292207   | -3.04290307 | 0.002343078 | 0.020578336 | humus     | PWY-6891            |
| 3874.8041 | -2.30148749    | 0.767279947 | -2.99954078 | 0.002703869 | 0.022757566 | humus     | P163-PWY            |
| 16860.174 | -1.21667815    | 0.412610561 | -2.94873245 | 0.003190801 | 0.025781671 | humus     | PWY-5022            |
| 110566.91 | -0.34610696    | 0.118434394 | -2.92235177 | 0.003473989 | 0.027519445 | humus     | PWY-3781            |
| 9216.1672 | -2.52379895    | 0.87608108  | -2.8807824  | 0.003966894 | 0.030819716 | humus     | PWY-6895            |
| 4837.789  | -3.06232678    | 1.068571971 | -2.86581238 | 0.004159407 | 0.031705667 | humus     | P461-PWY            |
| 9286.8142 | -2.28238953    | 0.802967389 | -2.84244362 | 0.004476915 | 0.033493956 | humus     | PWY-6383            |
| 42173.793 | -0.12805199    | 0.045315134 | -2.82581062 | 0.004716114 | 0.034642    | humus     | TCA                 |
| 30462.599 | -0.17988288    | 0.065061065 | -2.76483145 | 0.005695221 | 0.041086955 | humus     | PWY-6385            |
| 781.24239 | 13.19766174    | 1.511899142 | 8.72919454  | 2.56493E-18 | 1.03623E-15 | root      | ORNDEG-PWY          |
| 588.4357  | 12.78880276    | 1.585766045 | 8.064747507 | 7.33874E-16 | 9.88283E-14 | root      | PWY-6339            |
| 373.88331 | 12.13444868    | 1.714219886 | 7.078700219 | 1.45513E-12 | 1.46968E-10 | root      | PWY-1882            |
| 316.0314  | 11.89194972    | 1.768513188 | 6.72426409  | 1.76482E-11 | 1.42598E-09 | root      | PWY-6957            |
| 286.21957 | 11.74911395    | 1.912216457 | 6.144238486 | 8.0348E-10  | 5.4101E-08  | root      | PWY-2221            |
| 192.22808 | 11.17476551    | 1.998989282 | 5.590207816 | 2.26798E-08 | 1.01807E-06 | root      | P621-PWY            |
| 171.41979 | 11.00946904    | 2.043766443 | 5.386852825 | 7.17021E-08 | 2.89676E-06 | root      | PWY-1501            |
| 145.01312 | 10.76822136    | 2.235047528 | 4.817893681 | 1.45082E-06 | 3.90753E-05 | root      | PWY-5677            |
| 190.2472  | 11.15954659    | 2.326690809 | 4.796316962 | 1.61609E-06 | 4.08064E-05 | root      | PWY-5529            |
| 6129.2748 | 2.020519721    | 0.430996128 | 4.68802291  | 2.75857E-06 | 6.19146E-05 | root      | PWY-7328            |
| 124.53058 | 10.54850891    | 2.246836603 | 4.694826894 | 2.66833E-06 | 6.19146E-05 | root      | VALDEG-PWY          |
| 2579.8371 | 1.482981885    | 0.326738433 | 4.53874333  | 5.65905E-06 | 0.000120329 | root      | PWY-5419            |
| 95.047919 | 10.15873643    | 2.367715707 | 4.29052204  | 1.78254E-05 | 0.000360072 | root      | PWY-3941            |
| 118.03377 | 10.47080059    | 2.55060783  | 4.10521777  | 4.03934E-05 | 0.000679956 | root      | CHLOROPHYLL-SYN     |
| 2003.8401 | 2.680293295    | 0.678568207 | 3.949924663 | 7.81758E-05 | 0.001214732 | root      | GLUCOSE1PMETAB-PWY  |
| 1368.7953 | 2.847939691    | 0.750959096 | 3.792403217 | 0.000149196 | 0.001944366 | root      | PWY-7456            |
| 563.34538 | 3.042205767    | 0.851622565 | 3.572246546 | 0.000353932 | 0.004468391 | root      | AST-PWY             |
| 554.73221 | 2.335426911    | 0.656698759 | 3.55631388  | 0.000376095 | 0.004604311 | root      | PWY-5183            |
| 3214.3842 | 1.989694932    | 0.602414317 | 3.302867936 | 0.000957014 | 0.010816662 | root      | PWY-5860            |
| 3214.3842 | 1.989694932    | 0.602414317 | 3.302867936 | 0.000957014 | 0.010816662 | root      | PWY-5862            |
| 1780.8101 | 2.086757515    | 0.641689126 | 3.251975807 | 0.001146058 | 0.011978825 | root      | DENITRIFICATION-PWY |
| 1434.5297 | 2.105011749    | 0.648842005 | 3.244259362 | 0.001177565 | 0.011978825 | root      | PWY-5654            |
| 4491.1467 | 1.896425356    | 0.58866786  | 3.221554099 | 0.001274974 | 0.011978825 | root      | PWY-5845            |
| 4491.1467 | 1.896425356    | 0.58866786  | 3.221554099 | 0.001274974 | 0.011978825 | root      | PWY-5850            |
| 4491.1467 | 1.896425356    | 0.58866786  | 3.221554099 | 0.001274974 | 0.011978825 | root      | PWY-5896            |
| 26353.477 | 0.264538509    | 0.083574897 | 3.165286694 | 0.001549302 | 0.01390929  | root      | PWY-5345            |
| 50.212045 | 9.238364936    | 3.052594003 | 3.02639818  | 0.002474862 | 0.021273278 | root      | PWY-5088            |

|           |             |             |             |             |             |      |          |
|-----------|-------------|-------------|-------------|-------------|-------------|------|----------|
| 1474.1741 | 2.251596969 | 0.753713543 | 2.987337814 | 0.002814186 | 0.023202674 | root | PWY-5647 |
|-----------|-------------|-------------|-------------|-------------|-------------|------|----------|

## SUPPLEMENTAL MATERIAL #7

| sample_name      | organism   | chem_administration            | collection_date | env_broad_scale                                                                 | samp_store_dur  | samp_store_loc                   |
|------------------|------------|--------------------------------|-----------------|---------------------------------------------------------------------------------|-----------------|----------------------------------|
| 1_               | metagenome | NONE                           | 24-Oct          | High productivity farm field soil                                               | 3 Days at -80 C | FACEN-UNA, San Lorenzo, Paraguay |
| 1A               | metagenome | NONE                           | 24-Oct          | Low productivity farm field soil                                                | 3 Days at -80 C | FACEN-UNA, San Lorenzo, Paraguay |
| 1B               | metagenome | NONE                           | 24-Oct          | Low productivity farm field soil                                                | 3 Days at -80 C | FACEN-UNA, San Lorenzo, Paraguay |
| 1D               | metagenome | NONE                           | 24-Oct          | Low productivity farm field soil                                                | 3 Days at -80 C | FACEN-UNA, San Lorenzo, Paraguay |
| 1E               | metagenome | NONE                           | 24-Oct          | Low productivity farm field soil                                                | 3 Days at -80 C | FACEN-UNA, San Lorenzo, Paraguay |
| 1F               | metagenome | NONE                           | 24-Oct          | Low productivity farm field soil                                                | 3 Days at -80 C | FACEN-UNA, San Lorenzo, Paraguay |
| 2_               | metagenome | NONE                           | 24-Oct          | High productivity farm field soil                                               | 3 Days at -80 C | FACEN-UNA, San Lorenzo, Paraguay |
| 3_               | metagenome | NONE                           | 24-Oct          | High productivity farm field soil                                               | 3 Days at -80 C | FACEN-UNA, San Lorenzo, Paraguay |
| 3A               | metagenome | microbiome fertilizer additive | 24-Oct          | High productivity farm field soil treated with fertilizer additive              | 3 Days at -80 C | FACEN-UNA, San Lorenzo, Paraguay |
| 3B               | metagenome | microbiome fertilizer additive | 24-Oct          | High productivity farm field soil treated with fertilizer additive              | 3 Days at -80 C | FACEN-UNA, San Lorenzo, Paraguay |
| 3C               | metagenome | microbiome fertilizer additive | 24-Oct          | High productivity farm field soil treated with fertilizer additive              | 3 Days at -80 C | FACEN-UNA, San Lorenzo, Paraguay |
| 3D               | metagenome | microbiome fertilizer additive | 24-Oct          | High productivity farm field soil treated with fertilizer additive              | 3 Days at -80 C | FACEN-UNA, San Lorenzo, Paraguay |
| 4_               | metagenome | NONE                           | 24-Oct          | High productivity farm field soil                                               | 3 Days at -80 C | FACEN-UNA, San Lorenzo, Paraguay |
| 5A               | metagenome | NONE                           | 24-Oct          | High productivity farm field soil                                               | 3 Days at -80 C | FACEN-UNA, San Lorenzo, Paraguay |
| 5B               | metagenome | microbiome fertilizer additive | 24-Oct          | High productivity farm field soil treated with fertilizer additive              | 3 Days at -80 C | FACEN-UNA, San Lorenzo, Paraguay |
| FO01GONT         | metagenome | NONE                           | 22-Feb          | Remanent forest soil                                                            | 3 Days at -80 C | FACEN-UNA, San Lorenzo, Paraguay |
| FORESTaITAPUA2AB | metagenome | NONE                           | 22-Feb          | Remanent forest soil                                                            | 3 Days at -80 C | FACEN-UNA, San Lorenzo, Paraguay |
| KAI01ITAPUAPRODU | metagenome | NONE                           | 23-Sep          | High productivity farm field soil                                               | 3 Days at -80 C | FACEN-UNA, San Lorenzo, Paraguay |
| KAI02PINOSPRODUC | metagenome | NONE                           | 23-Sep          | High productivity farm field soil                                               | 3 Days at -80 C | FACEN-UNA, San Lorenzo, Paraguay |
| KAI03CENTRPRODUC | metagenome | NONE                           | 23-Sep          | High productivity farm field soil                                               | 3 Days at -80 C | FACEN-UNA, San Lorenzo, Paraguay |
| KAI04LICO-PRODUC | metagenome | NONE                           | 23-Sep          | High productivity farm field soil                                               | 3 Days at -80 C | FACEN-UNA, San Lorenzo, Paraguay |
| Productiveaaa1SB | metagenome | NONE                           | 23-Sep          | High productivity farm field soil                                               | 3 Days at -80 C | FACEN-UNA, San Lorenzo, Paraguay |
| SantaRosa-unprod | metagenome | NONE                           | 24-Oct          | High productivity farm field soil                                               | 3 Days at -80 C | FACEN-UNA, San Lorenzo, Paraguay |
| TREATEDFIELDI1   | metagenome | microbiome fertilizer additive | 22-Feb          | High productivity farm field soil treated with fertilizer additive              | 3 Days at -80 C | FACEN-UNA, San Lorenzo, Paraguay |
| TREATEDFIELDI2   | metagenome | microbiome fertilizer additive | 22-Feb          | High productivity farm field soil treated with fertilizer additive              | 3 Days at -80 C | FACEN-UNA, San Lorenzo, Paraguay |
| UNTREATEDFIELDI1 | metagenome | NONE                           | 22-Feb          | High productivity farm field soil                                               | 3 Days at -80 C | FACEN-UNA, San Lorenzo, Paraguay |
| UNTREATEDFIELDI2 | metagenome | NONE                           | 22-Feb          | High productivity farm field soil                                               | 3 Days at -80 C | FACEN-UNA, San Lorenzo, Paraguay |
| 4_humus          | metagenome | NONE                           | 21-Feb          | Fertilizer additive obtained from solid-state fermentation box at surface level | 3 Days at -80 C | FACEN-UNA, San Lorenzo, Paraguay |
| 5_humus          | metagenome | NONE                           | 21-Feb          | Fertilizer additive obtained from solid-state fermentation box at mid level     | 3 Days at -80 C | FACEN-UNA, San Lorenzo, Paraguay |
| 6_humus          | metagenome | NONE                           | 21-Feb          | Fertilizer additive obtained from solid-state fermentation box at bottom level  | 3 Days at -80 C | FACEN-UNA, San Lorenzo, Paraguay |
| 13_root          | metagenome | NONE                           | 21-Feb          | Root microbiome from well grown succulent plant                                 | 3 Days at -80 C | FACEN-UNA, San Lorenzo, Paraguay |
| 14_root          | metagenome | NONE                           | 21-Feb          | Root microbiome from well grown succulent plant                                 | 3 Days at -80 C | FACEN-UNA, San Lorenzo, Paraguay |



| sample_name      | env_local_scale                  | env_medium                     | geo_loc_name     | host             | lat_lon             |
|------------------|----------------------------------|--------------------------------|------------------|------------------|---------------------|
| 1_               | Farm soil                        | Soil                           | Paraguay: Itapua | Soil             | 26.1278 S 55.0442 W |
| 1A               | Farm soil                        | Soil                           | Paraguay: Itapua | Soil             | 26.1278 S 55.0442 W |
| 1B               | Farm soil                        | Soil                           | Paraguay: Itapua | Soil             | 26.1278 S 55.0442 W |
| 1D               | Farm soil                        | Soil                           | Paraguay: Itapua | Soil             | 26.1278 S 55.0442 W |
| 1E               | Farm soil                        | Soil                           | Paraguay: Itapua | Soil             | 26.1278 S 55.0442 W |
| 1F               | Farm soil                        | Soil                           | Paraguay: Itapua | Soil             | 26.1278 S 55.0442 W |
| 2_               | Farm soil                        | Soil                           | Paraguay: Itapua | Soil             | 26.1278 S 55.0442 W |
| 3_               | Farm soil                        | Soil                           | Paraguay: Itapua | Soil             | 26.1278 S 55.0442 W |
| 3A               | Farm soil                        | Soil                           | Paraguay: Itapua | Soil             | 26.1278 S 55.0442 W |
| 3B               | Farm soil                        | Soil                           | Paraguay: Itapua | Soil             | 26.1278 S 55.0442 W |
| 3C               | Farm soil                        | Soil                           | Paraguay: Itapua | Soil             | 26.1278 S 55.0442 W |
| 3D               | Farm soil                        | Soil                           | Paraguay: Itapua | Soil             | 26.1278 S 55.0442 W |
| 4_               | Farm soil                        | Soil                           | Paraguay: Itapua | Soil             | 26.1278 S 55.0442 W |
| 5A               | Farm soil                        | Soil                           | Paraguay: Itapua | Soil             | 26.1278 S 55.0442 W |
| 5B               | Farm soil                        | Soil                           | Paraguay: Itapua | Soil             | 26.1278 S 55.0442 W |
| FO01GONT         | Forest soil                      | Soil                           | Paraguay: Itapua | Soil             | 26.3708 S 54.9581 W |
| FORESTaITAPUA2AB | Forest soil                      | Soil                           | Paraguay: Itapua | Soil             | 26.3708 S 54.9581 W |
| KAI01ITAPUAPRODU | Farm soil                        | Soil                           | Paraguay: Itapua | Soil             | 26.2900 S 55.0264 W |
| KAI02PINOSPRODUC | Farm soil                        | Soil                           | Paraguay: Itapua | Soil             | 26.2900 S 55.0264 W |
| KAI03CENTRPRODUC | Farm soil                        | Soil                           | Paraguay: Itapua | Soil             | 26.2900 S 55.0264 W |
| KAI04LICO-PRODUC | Farm soil                        | Soil                           | Paraguay: Itapua | Soil             | 26.2900 S 55.0264 W |
| Productiveaaa1SB | Farm soil                        | Soil                           | Paraguay: Itapua | Soil             | 26.2269 S 55.1883 W |
| SantaRosa-unprod | Farm soil                        | Soil                           | Paraguay: Itapua | Soil             | 26.7933 S 56.7869 W |
| TREATEDFIELDITA1 | Farm soil                        | Soil                           | Paraguay: Itapua | Soil             | 26.3686 S 54.9800 W |
| TREATEDFIELDITA2 | Farm soil                        | Soil                           | Paraguay: Itapua | Soil             | 26.3686 S 54.9800 W |
| UNTREATEDFIELDI1 | Farm soil                        | Soil                           | Paraguay: Itapua | Soil             | 26.3670 S 54.9703 W |
| UNTREATEDFIELDI2 | Farm soil                        | Soil                           | Paraguay: Itapua | Soil             | 26.3670 S 54.9703 W |
| 4_humus          | Solid-state fermentation biomass | Solid-state fermentation bioma | Paraguay: Itapua | Fermentation box | 26.3733 S 54.9706 W |
| 5_humus          | Solid-state fermentation biomass | Solid-state fermentation bioma | Paraguay: Itapua | Fermentation box | 26.3733 S 54.9706 W |
| 6_humus          | Solid-state fermentation biomass | Solid-state fermentation bioma | Paraguay: Itapua | Fermentation box | 26.3733 S 54.9706 W |
| 13_root          | Exogenous root samples           | Soil                           | Paraguay: Itapua | Soil             | 26.3733 S 54.9706 W |
| 14_root          | Exogenous root samples           | Soil                           | Paraguay: Itapua | Soil             | 26.3733 S 54.9706 W |

| sample_name      | sieving                                                                                                                             | soil_type | soil_type_meth |
|------------------|-------------------------------------------------------------------------------------------------------------------------------------|-----------|----------------|
| 1_               | Pooled samples of around 50 g over an area within 20 m from each sampling point. Samples taken within 20 cm from the surface layer. | ultisol   | Literature     |
| 1A               | Pooled samples of around 50 g over an area within 20 m from each sampling point. Samples taken within 20 cm from the surface layer. | ultisol   | Literature     |
| 1B               | Pooled samples of around 50 g over an area within 20 m from each sampling point. Samples taken within 20 cm from the surface layer. | ultisol   | Literature     |
| 1D               | Pooled samples of around 50 g over an area within 20 m from each sampling point. Samples taken within 20 cm from the surface layer. | ultisol   | Literature     |
| 1E               | Pooled samples of around 50 g over an area within 20 m from each sampling point. Samples taken within 20 cm from the surface layer. | ultisol   | Literature     |
| 1F               | Pooled samples of around 50 g over an area within 20 m from each sampling point. Samples taken within 20 cm from the surface layer. | ultisol   | Literature     |
| 2_               | Pooled samples of around 50 g over an area within 20 m from each sampling point. Samples taken within 20 cm from the surface layer. | ultisol   | Literature     |
| 3_               | Pooled samples of around 50 g over an area within 20 m from each sampling point. Samples taken within 20 cm from the surface layer. | ultisol   | Literature     |
| 3A               | Pooled samples of around 50 g over an area within 20 m from each sampling point. Samples taken within 20 cm from the surface layer. | ultisol   | Literature     |
| 3B               | Pooled samples of around 50 g over an area within 20 m from each sampling point. Samples taken within 20 cm from the surface layer. | ultisol   | Literature     |
| 3C               | Pooled samples of around 50 g over an area within 20 m from each sampling point. Samples taken within 20 cm from the surface layer. | ultisol   | Literature     |
| 3D               | Pooled samples of around 50 g over an area within 20 m from each sampling point. Samples taken within 20 cm from the surface layer. | ultisol   | Literature     |
| 4_               | Pooled samples of around 50 g over an area within 20 m from each sampling point. Samples taken within 20 cm from the surface layer. | ultisol   | Literature     |
| 5A               | Pooled samples of around 50 g over an area within 20 m from each sampling point. Samples taken within 20 cm from the surface layer. | ultisol   | Literature     |
| 5B               | Pooled samples of around 50 g over an area within 20 m from each sampling point. Samples taken within 20 cm from the surface layer. | ultisol   | Literature     |
| FO01GONT         | Pooled samples of around 50 g over an area within 20 m from each sampling point. Samples taken within 20 cm from the surface layer. | ultisol   | Literature     |
| FORESTaITAPUA2AB | Pooled samples of around 50 g over an area within 20 m from each sampling point. Samples taken within 20 cm from the surface layer. | ultisol   | Literature     |
| KAI01ITAPUAPRODU | Pooled samples of around 50 g over an area within 20 m from each sampling point. Samples taken within 20 cm from the surface layer. | ultisol   | Literature     |
| KAI02PINOSPRODUC | Pooled samples of around 50 g over an area within 20 m from each sampling point. Samples taken within 20 cm from the surface layer. | ultisol   | Literature     |
| KAI03CENTRPRODUC | Pooled samples of around 50 g over an area within 20 m from each sampling point. Samples taken within 20 cm from the surface layer. | ultisol   | Literature     |
| KAI04LICO-PRODUC | Pooled samples of around 50 g over an area within 20 m from each sampling point. Samples taken within 20 cm from the surface layer. | ultisol   | Literature     |
| Productiveaaa1SB | Pooled samples of around 50 g over an area within 20 m from each sampling point. Samples taken within 20 cm from the surface layer. | ultisol   | Literature     |
| SantaRosa-unprod | Pooled samples of around 50 g over an area within 20 m from each sampling point. Samples taken within 20 cm from the surface layer. | ultisol   | Literature     |
| TREATEDFIELDITA1 | Pooled samples of around 50 g over an area within 20 m from each sampling point. Samples taken within 20 cm from the surface layer. | ultisol   | Literature     |
| TREATEDFIELDITA2 | Pooled samples of around 50 g over an area within 20 m from each sampling point. Samples taken within 20 cm from the surface layer. | ultisol   | Literature     |
| UNTREATEDFIELDI1 | Pooled samples of around 50 g over an area within 20 m from each sampling point. Samples taken within 20 cm from the surface layer. | ultisol   | Literature     |
| UNTREATEDFIELDI2 | Pooled samples of around 50 g over an area within 20 m from each sampling point. Samples taken within 20 cm from the surface layer. | ultisol   | Literature     |
| 4_humus          | Surface fermentation box, 50 g                                                                                                      | NA        | NA             |
| 5_humus          | Mid level fermentation box, 50 g                                                                                                    | NA        | NA             |
| 6_humus          | Bottom layer fermentation box, 50                                                                                                   | NA        | NA             |
| 13_root          | Samples taken from outside of the root                                                                                              | NA        | NA             |
| 14_root          | Samples taken from outside of the root                                                                                              | NA        | NA             |

[illegible]
